# Supplementary material for: Epithelial magnesium transport by TRPM6 is essential for prenatal development and adult survival
Source: eLife journal article supplement (doi:10.7554/elife.20914), 2016-12-19

Figure 4-figure supplement 3

A

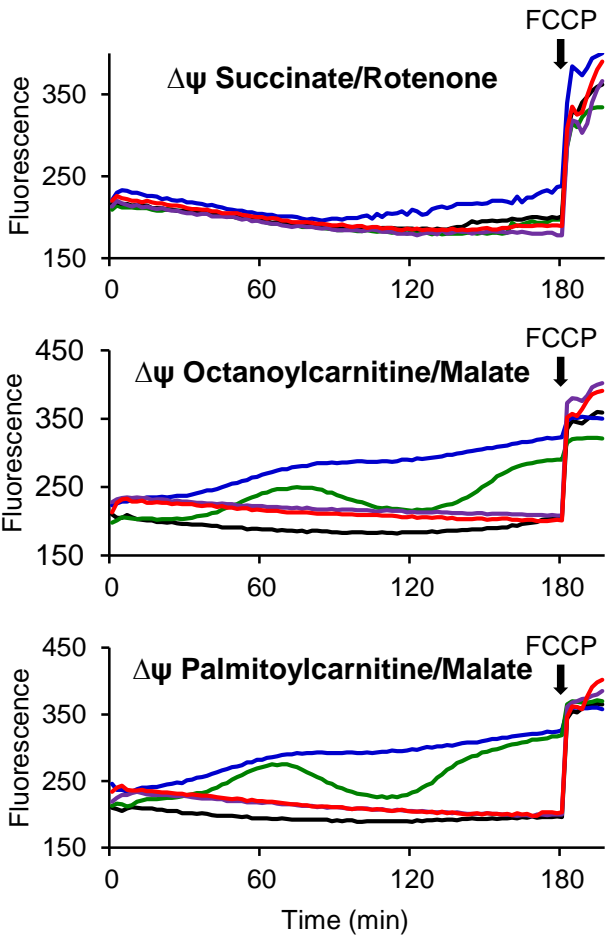

Depolarization start and end (min)

| Mg <sup>2+</sup> :        | +3 mM EDTA |                          |                 |                  |                  |
|---------------------------|------------|--------------------------|-----------------|------------------|------------------|
|                           | -          | -                        | +1 mM           | +3 mM            | +5 mM            |
| Legend                    |            |                          |                 |                  |                  |
| N (n)                     | 4 (6)      | 4 (6)                    | 4 (6)           | 4 (6)            | 4 (6)            |
| Succinate/Rotenone        |            |                          |                 |                  |                  |
| Start                     | 130 ± 19   | ≥ 180 <sup>a</sup><br>** | 158 ± 20<br>*#  | ≥ 180<br>**†     | ≥ 180<br>**†     |
| End                       | ≥ 180      | ≥ 180 <sup>a</sup>       | ≥ 180           | ≥ 180            | ≥ 180            |
| Octanoylcarnitine/Malate  |            |                          |                 |                  |                  |
| Start                     | 168 ± 14   | 19 ± 11<br>***           | 31 ± 11<br>***# | ≥ 180<br>####††† | ≥ 180<br>####††† |
| End                       | ≥ 180      | 175 ± 6                  | 178 ± 3         | ≥ 180            | ≥ 180            |
| Palmitoylcarnitine/Malate |            |                          |                 |                  |                  |
| Start                     | 157 ± 28   | 20 ± 7<br>***            | 38 ± 13<br>***  | ≥ 180<br>####††† | ≥ 180<br>####††† |
| End                       | ≥ 180      | 149 ± 42                 | ≥ 180           | ≥ 180            | ≥ 180            |

<sup>a</sup> N=3, n=5.

B

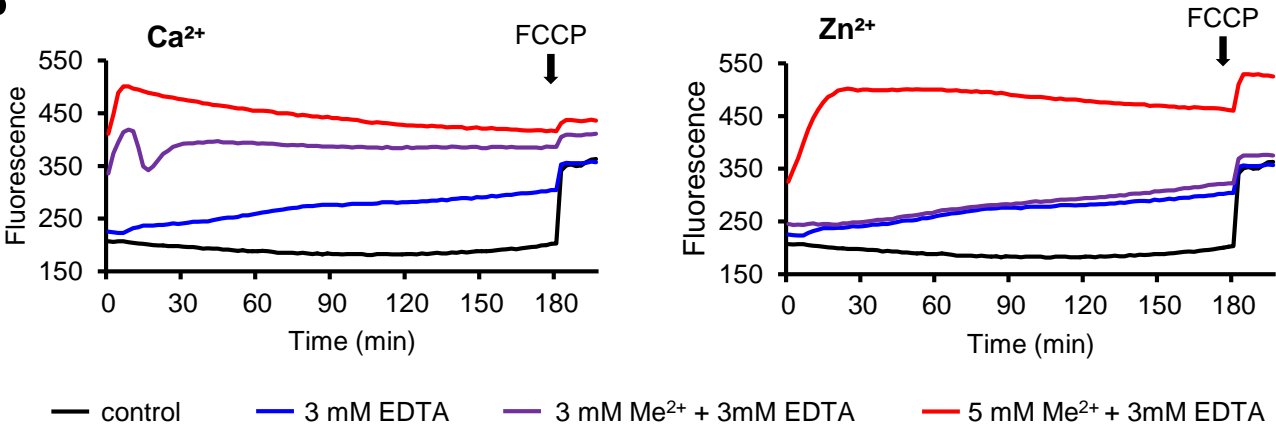

Supplement: supp [file elife_poa_e20914_Figure_Supplement.pdf › elife_poa_e20914_Figure_Supplement.pdf]
