# Supplementary material for: Epithelial magnesium transport by TRPM6 is essential for prenatal development and adult survival
Source: eLife. 2016 Dec 19;5:e20914. doi: 10.7554/eLife.20914 (PMC5218537; doi:10.7554/eLife.20914)
Supplement: Supplementary file 1. — Dataset is available in the Dryad Digital Repository (Chubanov and Gudermann, 2016). (1) Genome-wide analysis of hepatic transcriptome in control vs Trpm6-deficient mice. (2) Up- and down-regulated transcripts in the liver of Trpm6-deficient mice with the false discovery rate (FDR) p≤0.1. DOI: http://dx.doi.org/10.7554/eLife.20914.022 [file elife-20914-supp1.xls]

## Sheet: All genes
Genome-wide analysis of hepatic transcriptome in Trpm6 deficient mice
Affymetrix ID	Gene	p-value (limma)	p-value (FDR)	Control mean (log2)	KO mean (log2)	Fold change (log2)
10551218	Cyp2b9	2.32e-09	8.27e-05	5.1	13.8	8.71
10359593	Fmo3	8.07e-05	0.0795	5.6	11.3	5.73
10465726	Slc22a26	2.8e-08	0.000498	5.5	10.2	4.75
10551209	Cyp2b13	0.000261	0.132	4.1	8.6	4.48
10362464	Sult3a1	0.000367	0.163	3.2	6.7	3.48
10551197	Cyp2b10	0.000482	0.18	5.9	9.2	3.29
10511779	Atp6v0d2	2.91e-05	0.0623	6.5	9.6	3.13
10465734	Slc22a27	2.09e-06	0.0124	4.6	7.6	3.01
10561162	Cyp2a22	0.00297	0.377	5.1	8	2.88
10515187	Cyp4a14	0.00445	0.415	10.3	13.2	2.88
10431697	Abcd2	9.88e-05	0.0879	7	9.7	2.72
10382532	Slc16a5	0.000642	0.202	7.1	9.7	2.51
10574023	Mt2	0.0657	0.77	10.3	12.7	2.4
10522368	Nipal1	0.00194	0.322	6.9	9.3	2.35
10463037	Cyp2c39	0.000197	0.119	7.2	9.5	2.3
10531111	Sult1e1	0.0305	0.672	3.7	5.9	2.25
10397158	Acot3	0.000599	0.192	6.6	8.8	2.19
10574027	Mt1	0.0283	0.665	9.8	11.9	2.16
10562166	Hamp2	4.85e-05	0.0697	9	11.1	2.11
10570741	Defb1	0.000193	0.119	5.8	7.9	2.06
10551207	NA	0.000681	0.205	4.9	6.9	2
10512886	Acnat2	0.000916	0.232	9.2	11.2	1.96
10481627	Lcn2	0.00365	0.389	8.4	10.3	1.93
10467372	Cyp2c38	0.000242	0.132	9.2	11.2	1.93
10490559	Chrna4	0.0337	0.684	8.3	10.2	1.9
10598603	Sytl5	0.000978	0.24	6.2	8	1.87
10369993	Gstt3	4.14e-05	0.0697	9.6	11.5	1.87
10606928	Serpina7	0.000661	0.203	9.6	11.4	1.77
10345675	Npas2	0.0847	0.794	8	9.8	1.76
10521892	Slc34a2	0.0133	0.585	6.8	8.6	1.75
10548996	Slco1a4	0.000243	0.132	9.4	11.1	1.72
10462281	Vldlr	0.000109	0.0903	6.1	7.8	1.71
10603573	Sytl5	0.000477	0.18	6.3	8	1.68
10423030	Prlr	7.8e-05	0.0795	9.7	11.4	1.67
10463355	Scd2	0.0243	0.649	7.4	9	1.67
10505445	Orm3	0.00233	0.351	6.2	7.9	1.67
10413492	Lrtm1	0.0026	0.365	7.9	9.5	1.62
10359861	Mgst3	1.01e-05	0.04	7.7	9.3	1.6
10344501	NA	0.0238	0.647	3.3	4.9	1.58
10367059	BC089597	2.98e-07	0.00353	10.2	11.7	1.54
10505451	Orm2	0.0484	0.724	9.2	10.7	1.54
10543017	Pdk4	0.00519	0.429	8.6	10.1	1.52
10362091	NA	0.00479	0.429	8.5	10	1.52
10350733	Rgs16	0.0473	0.721	9.2	10.7	1.51
10429588	9030619P08Rik	0.00682	0.473	8.7	10.2	1.5
10506301	Lepr	0.0139	0.59	6.4	7.9	1.5
10340624	NA	0.0075	0.488	3.4	4.9	1.47
10423049	Prlr	0.00401	0.393	8.3	9.7	1.46
10445308	Cyp39a1	0.000108	0.0903	10.2	11.6	1.46
10338153	NA	0.114	0.82	3.2	4.6	1.46
10340638	NA	0.0108	0.554	3.1	4.6	1.45
10360053	Pcp4l1	0.00123	0.263	7.7	9.2	1.45
10507171	Cyp4a31	0.0376	0.689	10.2	11.7	1.44
10608648	NA	0.0039	0.393	8.5	9.9	1.42
10468239	Cyp17a1	0.0262	0.657	10.5	11.9	1.41
10467124	Acta2	0.0173	0.62	7.7	9.1	1.39
10464594	BC021614	0.00154	0.287	8.7	10.1	1.38
10372988	Slc16a7	1.44e-05	0.0428	9.9	11.3	1.38
10581538	Nqo1	0.000927	0.232	6.7	8.1	1.37
10608661	NA	0.00394	0.393	8.2	9.5	1.37
10340392	NA	0.0249	0.65	3.3	4.7	1.37
10359582	Fmo2	0.00153	0.287	8.2	9.6	1.35
10343997	NA	0.0382	0.69	3.2	4.5	1.31
10593473	1810046K07Rik	0.00529	0.429	8.1	9.4	1.3
10344110	NA	0.0191	0.632	3.4	4.7	1.3
10339904	NA	0.0181	0.623	4.9	6.2	1.29
10608634	NA	0.00404	0.394	8.3	9.6	1.28
10344197	NA	0.0993	0.811	3.4	4.6	1.28
10340350	NA	0.014	0.59	3	4.3	1.27
10344136	NA	0.0812	0.792	3.2	4.5	1.26
10362472	Rsph4a	0.0037	0.389	4.7	6	1.26
10339305	NA	0.0136	0.587	3.5	4.8	1.26
10338362	NA	0.00167	0.294	2.5	3.8	1.23
10344108	NA	0.00156	0.287	3	4.3	1.23
10511416	Tox	0.00671	0.468	7.4	8.6	1.23
10477920	Myl9	0.0202	0.641	7.1	8.3	1.22
10519527	Abcb1a	0.00073	0.211	6.5	7.7	1.22
10342835	NA	0.00737	0.487	4.3	5.5	1.21
10342271	NA	0.156	0.84	3.4	4.6	1.21
10494351	Mtmr11	0.001	0.243	6	7.2	1.19
10397153	Acot4	0.0011	0.258	9	10.1	1.19
10339596	NA	0.0849	0.794	4	5.2	1.19
10340739	NA	0.0132	0.585	4.6	5.8	1.19
10341160	NA	0.0358	0.685	5	6.1	1.19
10339054	NA	0.0377	0.689	2.9	4.1	1.19
10342013	NA	0.0834	0.793	4.5	5.7	1.18
10366043	Dusp6	0.00555	0.435	8.9	10.1	1.18
10585097	Gm5617	0.0177	0.62	9.6	10.7	1.18
10507163	NA	0.0126	0.579	11.5	12.7	1.17
10535331	Mmd2	7.11e-05	0.0788	8.2	9.3	1.16
10339396	NA	0.12	0.824	2.9	4.1	1.16
10587639	Nt5e	0.00581	0.437	8.2	9.3	1.14
10587323	NA	0.00583	0.437	9.9	11	1.14
10339336	NA	0.000467	0.18	4.7	5.8	1.14
10340240	NA	0.0133	0.585	5.7	6.8	1.13
10406519	Hapln1	0.0781	0.787	6	7.1	1.13
10472501	Cers6	0.0129	0.583	8.3	9.4	1.12
10341785	NA	0.00444	0.415	4.6	5.7	1.12
10595148	NA	0.00475	0.428	9	10.1	1.12
10339767	NA	0.0343	0.685	3.5	4.6	1.12
10341019	NA	0.0457	0.712	4.2	5.3	1.12
10507177	NA	0.0249	0.65	11.6	12.7	1.11
10587331	NA	0.00516	0.429	9.6	10.7	1.11
10338082	NA	0.0518	0.737	4.5	5.6	1.1
10342699	NA	0.0741	0.782	3.4	4.5	1.1
10342998	NA	0.000116	0.092	2.6	3.7	1.09
10339614	NA	0.0798	0.789	2.9	4	1.09
10342824	NA	0.0483	0.724	4.1	5.2	1.09
10343645	NA	0.0132	0.585	3.9	5	1.09
10437516	Ppl	0.00799	0.5	7.7	8.8	1.09
10343406	NA	0.0209	0.641	4.3	5.4	1.09
10443463	Cdkn1a	0.312	0.881	9.3	10.4	1.09
10338148	NA	0.0768	0.786	4.7	5.8	1.08
10341208	NA	0.00834	0.504	2.6	3.6	1.08
10339278	NA	0.0165	0.62	3.6	4.7	1.08
10550956	Ethe1	0.00372	0.389	10.1	11.1	1.07
10408647	Eci3	0.0102	0.541	5.1	6.1	1.07
10343579	NA	0.00285	0.372	3.9	5	1.07
10342440	NA	0.0345	0.685	4.7	5.8	1.07
10381416	Rnd2	0.00339	0.385	8.8	9.8	1.07
10338101	NA	0.101	0.813	5.3	6.4	1.07
10367045	Rdh16	6.27e-05	0.0743	9.7	10.7	1.07
10374223	Igfbp1	0.252	0.866	10.5	11.6	1.07
10587339	NA	0.00494	0.429	8.9	10	1.06
10557300	Aqp8	0.0259	0.655	11	12.1	1.06
10472538	Dhrs9	0.0203	0.641	8	9	1.06
10400941	Dhrs7	0.000157	0.116	9	10.1	1.05
10594519	Slc51b	0.0217	0.641	7	8	1.05
10338959	NA	0.144	0.837	5.1	6.1	1.04
10341917	NA	0.00399	0.393	3.3	4.3	1.03
10572271	Tm6sf2	0.00625	0.453	11.4	12.4	1.03
10507479	Tmem53	0.000715	0.208	9.3	10.3	1.02
10341030	NA	0.00395	0.393	2	3	1.02
10343652	NA	0.137	0.835	3.7	4.7	1.02
10463005	Cyp2c55	0.0308	0.672	6.9	7.9	1.02
10467766	Loxl4	0.0398	0.696	6.5	7.5	1.02
10338661	NA	0.0751	0.783	3.5	4.5	1.01
10344570	NA	0.0677	0.77	5.7	6.7	1.01
10563768	NA	0.00506	0.429	5	6	1.01
10344198	NA	0.0252	0.65	3.3	4.3	1
10342476	NA	0.0501	0.726	4.7	5.7	1
10372208	Acss3	0.0274	0.662	8.3	9.3	1
10343378	NA	0.0127	0.583	3	4	0.99
10342377	NA	0.0289	0.669	4	5	0.99
10344428	NA	0.00121	0.261	3.3	4.3	0.99
10408610	Tubb2a	0.136	0.835	9.5	10.5	0.99
10429140	Ndrg1	0.024	0.647	8.8	9.8	0.99
10343869	NA	0.0926	0.807	4.5	5.5	0.99
10344096	NA	0.125	0.83	4.4	5.4	0.98
10342742	NA	0.135	0.835	3.6	4.6	0.98
10341896	NA	0.15	0.84	2.5	3.4	0.98
10344456	NA	0.189	0.851	5.6	6.5	0.98
10344256	NA	0.156	0.84	2.6	3.6	0.97
10501218	Gstm3	0.0295	0.672	11.3	12.3	0.97
10351380	Ildr2	0.00907	0.522	8.3	9.2	0.97
10341910	NA	0.059	0.756	4.2	5.2	0.97
10343949	NA	0.00406	0.394	4.1	5.1	0.97
10342570	NA	0.176	0.849	4.9	5.8	0.96
10340520	NA	0.0323	0.676	4.9	5.9	0.96
10343077	NA	0.0538	0.748	3.2	4.2	0.96
10339172	NA	0.0946	0.808	5.7	6.7	0.96
10339837	NA	0.0585	0.756	3.6	4.5	0.95
10344272	NA	0.00167	0.294	3.1	4	0.95
10343574	NA	0.0143	0.593	4.3	5.3	0.95
10529979	Ppargc1a	0.0111	0.562	8.8	9.8	0.94
10342292	NA	0.0789	0.789	3.7	4.6	0.94
10408557	Serpinb1a	0.0101	0.54	6.7	7.7	0.94
10467768	Loxl4	0.0223	0.645	7	8	0.94
10344418	NA	0.342	0.891	4.2	5.1	0.93
10338451	NA	0.0014	0.273	2.6	3.5	0.93
10408251	Slc17a4	0.0087	0.516	9.8	10.7	0.93
10341391	NA	0.00484	0.429	2.5	3.4	0.93
10339687	NA	0.178	0.851	5.7	6.6	0.93
10343305	NA	0.164	0.846	5.1	6.1	0.93
10340690	NA	0.011	0.557	4.9	5.8	0.92
10343385	NA	0.0591	0.756	2.6	3.5	0.92
10580510	Sall1	0.00105	0.252	8	8.9	0.91
10343382	NA	0.219	0.856	3.4	4.3	0.91
10564507	Arrdc4	0.00628	0.454	8	8.9	0.91
10344000	NA	0.0498	0.726	4.5	5.4	0.91
10339082	NA	0.0211	0.641	4.1	5	0.9
10342252	NA	0.0985	0.81	3.7	4.6	0.9
10340179	NA	0.273	0.872	3.6	4.5	0.9
10341004	NA	0.231	0.858	2.2	3.1	0.9
10367041	Rdh9	0.000451	0.178	9.4	10.3	0.9
10340591	NA	0.00371	0.389	3.9	4.8	0.9
10340385	NA	0.227	0.857	3.8	4.7	0.89
10373334	Hsd17b6	0.0459	0.712	10.9	11.8	0.89
10342848	NA	0.146	0.838	4.4	5.3	0.89
10545045	Fam13a	0.00907	0.522	8.6	9.5	0.89
10340812	NA	0.109	0.82	4.4	5.3	0.89
10554269	Abhd2	0.000686	0.205	9.6	10.5	0.89
10342583	NA	0.109	0.82	4.4	5.3	0.88
10529977	Ppargc1a	0.0385	0.692	7.5	8.4	0.88
10341406	NA	0.173	0.848	3.4	4.3	0.88
10343506	NA	5.95e-05	0.0735	6.5	7.3	0.87
10343900	NA	0.0501	0.726	6.1	6.9	0.87
10397145	Acot2	0.0104	0.545	8.7	9.5	0.87
10340662	NA	0.115	0.82	4.7	5.6	0.87
10351533	Nr1i3	0.00477	0.429	9.9	10.8	0.86
10573578	NA	0.0268	0.658	10.6	11.5	0.86
10340931	NA	0.0594	0.757	3.4	4.3	0.86
10344491	NA	0.106	0.818	3.4	4.3	0.86
10338405	NA	0.0053	0.429	2.2	3.1	0.86
10603649	NA	0.00439	0.415	9.2	10.1	0.86
10343279	NA	0.0135	0.586	4.6	5.4	0.86
10339230	NA	0.187	0.851	4.5	5.4	0.86
10344481	NA	0.312	0.881	4.5	5.3	0.86
10340133	NA	0.0278	0.665	3.5	4.4	0.85
10342634	NA	0.155	0.84	4.1	4.9	0.85
10341310	NA	0.00776	0.492	2.9	3.8	0.85
10344320	NA	0.0465	0.718	3.9	4.7	0.85
10341058	NA	0.0977	0.81	2.8	3.7	0.85
10338590	NA	0.0133	0.585	4.9	5.7	0.85
10341046	NA	0.133	0.834	2.2	3.1	0.85
10344163	NA	0.028	0.665	4.7	5.5	0.85
10389261	Gm11437	0.0285	0.665	9.1	10	0.85
10456400	Tubb6	0.0411	0.699	8	8.8	0.85
10339074	NA	0.035	0.685	2.7	3.5	0.85
10343297	NA	0.0119	0.577	4	4.8	0.84
10341275	NA	0.196	0.851	4.6	5.4	0.84
10343338	NA	0.0172	0.62	3.8	4.7	0.84
10338185	NA	0.0221	0.643	2.9	3.7	0.84
10338071	NA	0.00231	0.35	2.6	3.5	0.83
10467420	Pdlim1	0.00726	0.484	10.3	11.1	0.83
10342326	NA	0.0672	0.77	4.6	5.4	0.83
10339922	NA	0.165	0.847	2.6	3.4	0.82
10342124	NA	0.104	0.816	4	4.8	0.82
10389775	Pctp	0.000874	0.231	10.7	11.5	0.82
10344397	NA	0.00397	0.393	3.6	4.5	0.82
10343431	NA	0.0682	0.77	7.1	7.9	0.81
10340718	NA	0.122	0.828	3.1	3.9	0.81
10520950	NA	0.00337	0.385	10	10.9	0.81
10340334	NA	0.0373	0.688	3.1	3.9	0.81
10341844	NA	0.0679	0.77	6.2	7.1	0.81
10338699	NA	0.000904	0.232	2.2	3	0.81
10341986	NA	0.0141	0.592	6.5	7.3	0.81
10403911	Gpx6	0.0217	0.641	6.8	7.7	0.81
10338192	NA	0.204	0.851	3.9	4.8	0.81
10340309	NA	0.2	0.851	5.3	6.2	0.81
10432918	Krt8	0.0154	0.609	12.2	13	0.81
10339213	NA	0.166	0.847	3.8	4.6	0.81
10342798	NA	0.044	0.709	4.4	5.2	0.8
10344432	NA	0.115	0.82	4.3	5.1	0.8
10342748	NA	0.372	0.896	3.6	4.4	0.8
10339900	NA	0.015	0.604	3	3.8	0.8
10343599	NA	0.0872	0.799	5.8	6.6	0.8
10353036	Tcf24	0.0129	0.583	6.6	7.4	0.8
10340652	NA	0.0676	0.77	5.7	6.5	0.8
10338078	NA	0.125	0.83	5	5.8	0.8
10339549	NA	0.031	0.672	4.7	5.5	0.8
10341498	NA	0.00145	0.278	3.8	4.6	0.8
10338252	NA	0.0123	0.577	3.2	4	0.8
10339945	NA	0.000916	0.232	7.5	8.3	0.8
10343868	NA	0.0434	0.708	5	5.8	0.8
10338889	NA	0.0668	0.77	5	5.7	0.79
10343525	NA	0.396	0.903	4.2	5	0.79
10339581	NA	0.031	0.672	5	5.8	0.79
10343511	NA	0.0251	0.65	3.6	4.4	0.79
10343700	NA	0.0966	0.81	4.2	4.9	0.79
10341662	NA	0.238	0.86	3	3.8	0.79
10338497	NA	0.224	0.856	5.1	5.9	0.78
10341726	NA	0.0684	0.77	3.4	4.2	0.78
10341308	NA	0.122	0.828	3.8	4.6	0.78
10340229	NA	0.129	0.831	5.5	6.3	0.78
10342293	NA	0.133	0.834	3.9	4.7	0.78
10342236	NA	0.148	0.838	3.1	3.9	0.78
10340173	NA	0.043	0.707	5	5.8	0.78
10343860	NA	0.00514	0.429	2.9	3.7	0.78
10341627	NA	0.00422	0.405	4.4	5.2	0.78
10484201	Ccdc141	0.0125	0.578	6.8	7.6	0.78
10484197	Ccdc141	0.0165	0.62	7.9	8.7	0.78
10458028	Gypc	0.00141	0.273	7.8	8.5	0.78
10342311	NA	0.134	0.835	5.5	6.3	0.77
10364950	Gadd45b	0.0169	0.62	6.9	7.7	0.77
10588037	Rbp1	0.0665	0.77	8.3	9.1	0.77
10339483	NA	0.119	0.823	4	4.8	0.77
10342512	NA	0.173	0.848	4.1	4.9	0.77
10389022	Myo1d	0.00168	0.295	8.3	9.1	0.77
10339971	NA	0.00267	0.368	4.3	5	0.77
10339912	NA	0.0213	0.641	3.1	3.9	0.77
10483150	Fign	0.0147	0.6	6.3	7.1	0.77
10344608	NA	0.14	0.836	4.8	5.5	0.77
10343988	NA	0.0034	0.385	4.2	4.9	0.77
10339115	NA	0.00805	0.5	2.8	3.6	0.77
10342674	NA	0.116	0.82	4.3	5	0.77
10551264	Cyp2b19	0.0013	0.272	5.1	5.9	0.77
10367050	NA	0.0221	0.643	5.5	6.3	0.77
10344573	NA	0.205	0.851	6.2	6.9	0.77
10433562	NA	0.0259	0.655	10.7	11.5	0.77
10339925	NA	0.00967	0.535	5.8	6.5	0.76
10341008	NA	0.0263	0.657	4.3	5.1	0.76
10339600	NA	0.12	0.825	3.3	4.1	0.76
10341143	NA	0.0143	0.593	2.6	3.4	0.76
10341047	NA	0.0165	0.62	3.5	4.3	0.76
10341642	NA	0.0899	0.803	3.5	4.2	0.76
10539295	Dqx1	0.00583	0.437	6.8	7.6	0.76
10556113	NA	0.0378	0.69	10.1	10.9	0.76
10338902	NA	0.0179	0.622	3	3.8	0.75
10338652	NA	0.0231	0.647	4.2	4.9	0.75
10341077	NA	0.228	0.857	3.7	4.4	0.75
10343963	NA	0.0108	0.554	5	5.7	0.75
10339732	NA	0.057	0.754	5.4	6.1	0.75
10343137	NA	0.0223	0.645	4.7	5.4	0.75
10499198	NA	0.0227	0.647	11	11.7	0.75
10338948	NA	0.18	0.851	3.5	4.3	0.75
10343508	NA	0.0215	0.641	4.1	4.8	0.74
10594103	Rec114	0.129	0.831	5.6	6.4	0.74
10343452	NA	0.251	0.865	3.5	4.2	0.74
10492174	Tm4sf4	0.000588	0.192	10.6	11.4	0.74
10341506	NA	0.203	0.851	2.3	3.1	0.74
10404113	Slc17a1	3.03e-06	0.0154	8.5	9.2	0.74
10593123	Tagln	0.0585	0.756	6.9	7.6	0.74
10340119	NA	0.0774	0.786	3.7	4.4	0.74
10447904	NA	0.0269	0.658	8.6	9.3	0.74
10379820	Acaca	0.0311	0.672	9.8	10.6	0.74
10339539	NA	0.0572	0.754	4.2	4.9	0.74
10338258	NA	0.111	0.82	6.6	7.3	0.74
10341542	NA	0.153	0.84	3.3	4	0.73
10443193	Rpl30	0.0249	0.65	10.9	11.6	0.73
10447634	NA	0.0262	0.657	8.7	9.5	0.73
10343905	NA	0.0479	0.723	4.5	5.2	0.73
10338759	NA	0.229	0.857	6.3	7.1	0.73
10397699	NA	0.0244	0.649	11.1	11.8	0.73
10339368	NA	0.00852	0.511	4.7	5.5	0.73
10340482	NA	0.224	0.856	3.3	4	0.73
10342901	NA	0.0252	0.65	2.1	2.8	0.73
10433902	Gm5481	0.0271	0.658	10.7	11.4	0.73
10358454	NA	0.0331	0.681	9.8	10.5	0.73
10343540	NA	0.128	0.831	4.6	5.3	0.72
10380699	Copz2	0.013	0.583	9.4	10.1	0.72
10340765	NA	0.00377	0.389	7.8	8.6	0.72
10338416	NA	0.243	0.862	4.1	4.9	0.72
10537349	NA	0.0259	0.655	10.9	11.7	0.72
10341449	NA	0.0287	0.666	3.9	4.7	0.72
10392388	Prkca	0.0118	0.576	7.9	8.6	0.72
10546977	Atp2b2	0.0325	0.677	7.4	8.1	0.72
10501199	Gstm7	0.0247	0.65	11.3	12	0.71
10339086	NA	0.104	0.816	3.3	4	0.71
10338833	NA	0.113	0.82	5.8	6.5	0.71
10342099	NA	0.167	0.847	6.3	7	0.71
10343684	NA	0.00401	0.393	6.5	7.2	0.71
10606255	NA	0.0261	0.656	11	11.7	0.71
10343901	NA	0.0613	0.759	3.8	4.5	0.71
10342452	NA	0.125	0.83	2.7	3.4	0.71
10343491	NA	0.0586	0.756	3.7	4.4	0.71
10340057	NA	0.0215	0.641	4.6	5.3	0.71
10340735	NA	0.158	0.841	3.9	4.7	0.71
10340726	NA	0.0131	0.585	3.4	4.1	0.71
10568001	Sult1a1	3.29e-05	0.0651	11	11.7	0.71
10342959	NA	0.142	0.836	2.1	2.8	0.7
10603469	NA	0.0308	0.672	9.6	10.3	0.7
10359561	Fmo4	0.0652	0.77	7.9	8.6	0.7
10340635	NA	0.146	0.838	4.9	5.6	0.7
10338794	NA	0.232	0.858	4.6	5.3	0.7
10338431	NA	0.115	0.82	4.5	5.2	0.7
10342484	NA	0.0406	0.698	8.2	8.9	0.7
10385570	NA	0.0247	0.65	10.9	11.6	0.7
10341447	NA	0.0376	0.689	6.2	6.9	0.7
10342818	NA	0.0795	0.789	4.6	5.3	0.7
10343435	NA	0.169	0.847	5.2	5.9	0.7
10339907	NA	0.0335	0.682	4.2	4.9	0.7
10344295	NA	0.101	0.813	2.8	3.5	0.7
10342556	NA	0.0122	0.577	3.2	3.9	0.7
10344067	NA	0.0155	0.611	5.9	6.6	0.7
10344485	NA	0.024	0.647	3.8	4.5	0.7
10606538	NA	0.0259	0.655	11.3	12	0.7
10341517	NA	0.206	0.852	4.1	4.8	0.7
10412260	Fst	0.0101	0.54	7.4	8.1	0.69
10343373	NA	0.0584	0.756	3.4	4.1	0.69
10344354	NA	0.0714	0.777	3.3	4	0.69
10341265	NA	0.187	0.851	4.5	5.2	0.69
10458555	Spry4	0.069	0.77	7.6	8.3	0.69
10362129	Vnn3	0.004	0.393	9.7	10.3	0.69
10493548	Pmvk	0.0322	0.676	9.4	10	0.69
10342953	NA	0.177	0.85	3.4	4.1	0.69
10339259	NA	0.102	0.815	3.7	4.4	0.69
10340894	NA	0.217	0.856	4.8	5.4	0.69
10339517	NA	0.0625	0.761	3	3.7	0.69
10339081	NA	0.274	0.873	5.7	6.4	0.69
10340198	NA	0.0651	0.77	3.1	3.8	0.69
10340016	NA	0.187	0.851	5.9	6.6	0.69
10341955	NA	0.237	0.86	4.6	5.2	0.69
10342544	NA	0.0689	0.77	4.5	5.2	0.69
10338277	NA	0.0967	0.81	6.5	7.2	0.69
10339954	NA	0.345	0.891	5.5	6.2	0.69
10498710	Bche	0.00374	0.389	11	11.7	0.68
10587315	Gsta4	0.0049	0.429	10.5	11.2	0.68
10338377	NA	0.236	0.86	3.2	3.9	0.68
10339550	NA	0.0265	0.657	4.9	5.6	0.68
10554938	Rab30	0.0699	0.772	7.4	8.1	0.68
10342663	NA	0.202	0.851	5	5.7	0.68
10531284	NA	0.085	0.795	10.8	11.5	0.68
10343341	NA	0.166	0.847	2.9	3.6	0.68
10514590	Dock7	0.00259	0.365	8	8.7	0.68
10341690	NA	0.0068	0.472	3.6	4.3	0.68
10344059	NA	0.188	0.851	5	5.7	0.68
10342284	NA	0.27	0.872	5.5	6.2	0.68
10510462	NA	0.083	0.793	10.9	11.6	0.68
10340620	NA	0.121	0.827	5	5.7	0.68
10343546	NA	0.00426	0.407	2.8	3.5	0.68
10344266	NA	0.0262	0.657	6.7	7.3	0.68
10343870	NA	0.0562	0.754	5.2	5.9	0.68
10393970	Fasn	0.0679	0.77	12.4	13.1	0.68
10462507	Papss2	0.000184	0.119	11.9	12.6	0.68
10415052	Mmp14	0.00635	0.455	8.4	9.1	0.68
10339508	NA	0.0859	0.797	5.7	6.4	0.67
10338352	NA	0.018	0.622	5	5.7	0.67
10342011	NA	0.139	0.836	5.8	6.4	0.67
10547200	NA	0.00217	0.34	7.8	8.4	0.67
10557175	NA	0.0254	0.652	2.9	3.6	0.67
10556463	Arntl	0.259	0.868	8.1	8.7	0.67
10513869	Megf9	0.0112	0.564	9.3	10	0.67
10593174	Gm10680	0.0255	0.653	8.2	8.9	0.67
10505028	Slc44a1	0.065	0.77	10.2	10.8	0.67
10341429	NA	0.09	0.803	3.8	4.5	0.67
10342882	NA	0.104	0.816	5.1	5.7	0.67
10525914	NA	0.0487	0.724	3.9	4.6	0.67
10340148	NA	0.246	0.863	3	3.7	0.67
10343185	NA	0.0258	0.655	5.6	6.2	0.66
10436967	Cbr1	0.000168	0.119	10	10.7	0.66
10393754	Actg1	0.0717	0.777	11.7	12.4	0.66
10339842	NA	0.151	0.84	3.3	4	0.66
10537306	Akr1d1	0.000638	0.202	10.9	11.6	0.66
10417068	NA	0.0358	0.685	7.1	7.7	0.66
10342863	NA	0.0182	0.624	4.6	5.2	0.66
10386473	Srebf1	0.0244	0.649	10.1	10.7	0.66
10341666	NA	0.0553	0.752	5.5	6.2	0.66
10506424	NA	0.0691	0.77	11.8	12.4	0.66
10502081	Enpep	0.000587	0.192	10.7	11.4	0.66
10343479	NA	0.0101	0.54	3.2	3.9	0.66
10344510	NA	0.106	0.818	4.7	5.4	0.66
10425822	Pnpla3	0.00136	0.273	7.4	8	0.66
10600027	NA	0.019	0.632	10.7	11.4	0.66
10428012	Ropn1l	2.91e-05	0.0623	8.5	9.2	0.66
10563706	Mrgpra9	0.0644	0.768	3.9	4.6	0.66
10463043	Cyp2c37	0.00296	0.377	12	12.7	0.66
10339244	NA	0.249	0.863	5.2	5.8	0.66
10468980	Fam107b	0.017	0.62	7.8	8.4	0.66
10352867	Plxna2	0.0761	0.785	8.7	9.3	0.66
10537169	Akr1b7	0.00876	0.518	5	5.7	0.65
10342954	NA	0.274	0.873	5.2	5.8	0.65
10470314	NA	0.0414	0.699	5.8	6.4	0.65
10342122	NA	0.123	0.828	3	3.6	0.65
10341285	NA	0.142	0.836	3.3	4	0.65
10341088	NA	0.166	0.847	2.4	3	0.65
10504606	Aldh1b1	0.019	0.632	8.8	9.5	0.65
10605338	G6pdx	0.0667	0.77	7.9	8.6	0.65
10340390	NA	0.0994	0.811	4.8	5.4	0.65
10341782	NA	0.0641	0.767	3.5	4.1	0.65
10368289	Enpp1	5.6e-05	0.0735	9.9	10.5	0.65
10340886	NA	0.401	0.903	4.6	5.2	0.65
10394538	NA	0.0373	0.688	10.5	11.2	0.65
10433776	Snai2	0.0414	0.699	8.5	9.2	0.65
10344226	NA	0.0157	0.611	3.8	4.5	0.65
10338359	NA	0.21	0.854	4.7	5.3	0.65
10590972	NA	0.00436	0.413	12	12.6	0.65
10342078	NA	0.253	0.866	2.2	2.8	0.65
10382136	1810010H24Rik	0.00256	0.365	7.8	8.4	0.64
10338114	NA	0.0339	0.684	4.1	4.7	0.64
10342521	NA	0.0395	0.695	5.3	6	0.64
10338694	NA	0.152	0.84	3.3	4	0.64
10344119	NA	0.0311	0.672	2.3	3	0.64
10338251	NA	0.103	0.816	6.4	7.1	0.64
10340891	NA	0.221	0.856	3.9	4.6	0.64
10339342	NA	0.002	0.328	4.3	4.9	0.64
10343106	NA	0.0235	0.647	3.9	4.6	0.64
10342426	NA	0.242	0.862	2.9	3.5	0.64
10438575	Ehhadh	0.00639	0.455	11.2	11.9	0.64
10340408	NA	0.0185	0.627	8.2	8.8	0.64
10342580	NA	0.0267	0.657	4.8	5.4	0.64
10407159	Ankrd55	0.029	0.669	6.3	6.9	0.64
10338941	NA	0.0654	0.77	2.8	3.5	0.64
10344288	NA	0.135	0.835	3.1	3.7	0.64
10345715	Map4k4	0.00193	0.322	7.3	7.9	0.64
10385822	Gm10447	0.0187	0.629	6.6	7.2	0.64
10344296	NA	0.0392	0.693	5.9	6.6	0.64
10342543	NA	0.00818	0.502	3.8	4.4	0.64
10546180	Gm839	0.0725	0.778	5.5	6.1	0.64
10465753	NA	0.0359	0.686	5	5.7	0.64
10341468	NA	0.174	0.848	3.7	4.4	0.64
10342921	NA	0.0647	0.77	4.2	4.9	0.63
10338625	NA	0.102	0.814	3.7	4.4	0.63
10366707	Avpr1a	0.122	0.828	9.7	10.3	0.63
10516064	Mfsd2a	0.256	0.867	11.4	12.1	0.63
10341881	NA	0.103	0.815	5.7	6.3	0.63
10604057	2006-09-01	0.00448	0.417	6.6	7.2	0.63
10583753	Gm6484	0.308	0.881	9.4	10	0.63
10342899	NA	0.116	0.821	2.9	3.5	0.63
10342540	NA	0.193	0.851	4.3	4.9	0.63
10338169	NA	0.3	0.879	4.5	5.1	0.63
10569646	Ccnd1	0.0257	0.655	8.9	9.5	0.63
10391146	Acly	0.0533	0.747	11.5	12.1	0.63
10362422	Trdn	0.0669	0.77	3.1	3.7	0.63
10342026	NA	0.155	0.84	4.8	5.4	0.63
10367600	Esr1	0.000896	0.232	8.9	9.5	0.63
10341751	NA	0.204	0.851	3	3.7	0.63
10443332	Ppard	0.0939	0.808	9.1	9.7	0.63
10344445	NA	0.285	0.874	4.3	4.9	0.63
10606858	Tceal8	0.0209	0.641	8.5	9.1	0.63
10343583	NA	0.0796	0.789	4.2	4.8	0.63
10341493	NA	0.00349	0.388	5.1	5.7	0.62
10339218	NA	0.0458	0.712	4.5	5.1	0.62
10343244	NA	0.0549	0.75	2.3	2.9	0.62
10351825	Tagln2	0.108	0.82	7.9	8.5	0.62
10598083	COX1	0.682	0.96	7.9	8.5	0.62
10363669	Dnajc12	0.0012	0.261	7.9	8.5	0.62
10406171	Tppp	0.0296	0.672	7.7	8.4	0.62
10338262	NA	0.156	0.84	2.9	3.6	0.62
10342191	NA	0.233	0.859	3.4	4	0.62
10585010	Apoa4	0.000549	0.191	12	12.6	0.62
10343603	NA	0.00147	0.28	7.7	8.3	0.62
10340857	NA	0.0436	0.708	5.2	5.9	0.62
10341166	NA	0.225	0.857	5.8	6.4	0.62
10341706	NA	0.0953	0.808	4.7	5.3	0.62
10338340	NA	0.129	0.831	4.3	4.9	0.62
10342123	NA	0.164	0.846	4.1	4.7	0.62
10342694	NA	0.0118	0.576	4.3	4.9	0.62
10341639	NA	0.146	0.838	4.9	5.5	0.62
10342164	NA	0.00942	0.531	5.9	6.5	0.62
10344342	NA	0.208	0.853	6.4	7	0.62
10342239	NA	0.273	0.872	4.6	5.2	0.62
10499366	Pmf1	0.00519	0.429	8.2	8.8	0.62
10561806	NA	0.00561	0.435	11.3	11.9	0.62
10343117	NA	0.0427	0.705	4.8	5.4	0.62
10528922	NA	0.0436	0.708	4.2	4.8	0.62
10339744	NA	0.174	0.848	3.7	4.3	0.62
10357878	Adora1	0.00238	0.354	8	8.6	0.61
10348702	Agxt	0.00469	0.425	11.4	12.1	0.61
10356084	Irs1	0.035	0.685	9	9.6	0.61
10399696	Rnf144a	0.0015	0.283	8	8.6	0.61
10338914	NA	0.286	0.874	4.4	5	0.61
10340112	NA	0.00513	0.429	9.8	10.4	0.61
10343157	NA	0.0135	0.586	2.3	2.9	0.61
10342173	NA	0.143	0.837	5.3	5.9	0.61
10379489	Tmem98	0.00223	0.345	7.9	8.5	0.61
10370021	Mif	0.00607	0.445	11.3	11.9	0.61
10421697	Lacc1	0.0322	0.676	7.9	8.5	0.61
10338575	NA	0.134	0.835	3.4	4	0.61
10340461	NA	0.0377	0.689	5.6	6.2	0.61
10343416	NA	0.101	0.813	5	5.6	0.61
10342823	NA	0.358	0.893	2.1	2.7	0.61
10433114	Itga5	0.0203	0.641	8.8	9.5	0.61
10338724	NA	0.132	0.834	6.4	7	0.61
10338376	NA	0.252	0.866	3.7	4.3	0.61
10339270	NA	0.0108	0.554	2.3	2.9	0.61
10343323	NA	0.255	0.866	4	4.6	0.61
10338596	NA	0.068	0.77	2.6	3.2	0.61
10342002	NA	0.324	0.883	2.3	2.9	0.61
10456974	NA	0.0274	0.662	12.1	12.7	0.61
10344273	NA	0.0616	0.759	4.4	5.1	0.61
10339164	NA	0.0829	0.793	2.8	3.4	0.61
10339573	NA	0.153	0.84	5.3	5.9	0.61
10408689	Nrn1	0.00121	0.261	12	12.6	0.6
10343944	NA	0.144	0.837	2.7	3.3	0.6
10342018	NA	0.186	0.851	2.8	3.4	0.6
10569707	Myadm	0.0372	0.688	9.2	9.8	0.6
10341911	NA	0.152	0.84	3.8	4.4	0.6
10341276	NA	0.0657	0.77	4.2	4.8	0.6
10341788	NA	0.119	0.823	6.7	7.3	0.6
10551836	Cox7a1	0.0125	0.578	7.6	8.2	0.6
10342549	NA	0.0362	0.686	4.7	5.3	0.6
10397984	Ppp4r4	0.00326	0.385	6.1	6.7	0.6
10474700	Thbs1	0.0342	0.685	6.9	7.5	0.6
10408870	Tbc1d7	0.0361	0.686	8	8.6	0.6
10343669	NA	0.111	0.82	2.4	3	0.6
10341529	NA	0.188	0.851	3.5	4.1	0.6
10338744	NA	0.0938	0.808	2.7	3.3	0.6
10341398	NA	0.218	0.856	3.3	3.9	0.6
10584578	Hspa8	0.22	0.856	8.3	8.9	0.6
10343783	NA	0.00251	0.364	5.8	6.4	0.6
10343681	NA	0.0285	0.665	3.1	3.7	0.6
10342524	NA	0.0569	0.754	7.7	8.3	0.6
10342370	NA	0.3	0.879	4.3	4.8	0.6
10489759	Sulf2	0.00139	0.273	8.3	8.9	0.6
10339972	NA	0.00692	0.477	5.7	6.3	0.6
10339041	NA	0.0183	0.624	5.1	5.7	0.6
10341958	NA	0.123	0.828	4.2	4.8	0.6
10339990	NA	0.103	0.816	4.6	5.2	0.6
10343705	NA	0.176	0.849	4.6	5.2	0.59
10339641	NA	0.221	0.856	4.6	5.2	0.59
10340504	NA	0.238	0.86	5.5	6.1	0.59
10343641	NA	0.00965	0.535	4.8	5.4	0.59
10340149	NA	0.0855	0.796	5.5	6.1	0.59
10338395	NA	0.1	0.813	9.5	10.1	0.59
10564857	NA	0.0002	0.119	11.1	11.7	0.59
10347748	NA	0.011	0.557	8.4	9	0.59
10341800	NA	0.0164	0.62	3.6	4.2	0.59
10343972	NA	0.0315	0.673	4.3	4.9	0.59
10340730	NA	0.131	0.834	4.9	5.5	0.59
10340565	NA	0.271	0.872	3.5	4.1	0.59
10399005	Crip1	0.0138	0.589	8.8	9.4	0.59
10341144	NA	0.0861	0.797	5.5	6.1	0.59
10340310	NA	0.276	0.873	5.1	5.7	0.59
10344351	NA	0.0305	0.672	4.9	5.5	0.59
10339856	NA	0.121	0.827	4.8	5.4	0.59
10341084	NA	0.175	0.849	3.3	3.9	0.59
10340797	NA	0.229	0.857	5.4	6	0.59
10342557	NA	0.131	0.834	3.4	4	0.59
10339703	NA	0.363	0.895	2.5	3.1	0.59
10340001	NA	8.25e-05	0.0795	9.6	10.2	0.59
10343269	NA	0.0221	0.644	1.8	2.4	0.59
10341601	NA	0.0308	0.672	9.8	10.4	0.59
10342701	NA	0.0577	0.755	3.4	4	0.59
10389214	Ccl9	0.00194	0.322	11	11.6	0.59
10541301	Tuba8	0.0371	0.688	7.8	8.4	0.59
10341707	NA	0.21	0.854	3.3	3.9	0.59
10600235	Abcd1	0.0174	0.62	8.8	9.4	0.59
10339861	NA	0.142	0.836	6.4	7	0.59
10344311	NA	0.315	0.881	3.6	4.2	0.59
10338821	NA	0.0418	0.7	5	5.6	0.59
10339087	NA	0.167	0.847	3.8	4.4	0.59
10340344	NA	0.0128	0.583	2.4	3	0.58
10506330	NA	0.0312	0.672	4.2	4.8	0.58
10341513	NA	0.0681	0.77	5.9	6.4	0.58
10338732	NA	0.433	0.909	4.6	5.2	0.58
10338926	NA	0.0537	0.748	4.9	5.5	0.58
10510159	Gm13242	0.0585	0.756	3	3.6	0.58
10341646	NA	0.33	0.885	7.6	8.2	0.58
10503023	Cth	0.000175	0.119	12.6	13.2	0.58
10343342	NA	0.0411	0.699	3.2	3.8	0.58
10341679	NA	0.45	0.912	3.6	4.1	0.58
10542156	Clec2d	0.0316	0.673	10.8	11.4	0.58
10440300	NA	0.0376	0.689	8.1	8.7	0.58
10571036	Ppapdc1b	0.0563	0.754	9.3	9.8	0.58
10341157	NA	0.31	0.881	4.7	5.3	0.58
10484203	Ccdc141	0.0025	0.364	6.8	7.4	0.58
10342900	NA	0.0285	0.665	3	3.6	0.58
10343133	NA	0.111	0.82	3.5	4.1	0.58
10339497	NA	0.12	0.826	10.8	11.3	0.58
10342826	NA	0.0252	0.65	4.3	4.9	0.58
10339228	NA	0.331	0.885	5.1	5.7	0.58
10338555	NA	0.129	0.831	3.5	4.1	0.58
10338900	NA	0.242	0.862	2.9	3.5	0.58
10343960	NA	0.0411	0.699	4.7	5.3	0.58
10343792	NA	0.149	0.84	3	3.6	0.58
10484207	Ccdc141	0.0194	0.637	6.9	7.5	0.58
10338470	NA	0.0458	0.712	5	5.6	0.58
10402368	Serpina6	0.0236	0.647	12.5	13	0.57
10341305	NA	0.0337	0.684	3.5	4.1	0.57
10351041	NA	0.17	0.847	6.3	6.9	0.57
10344475	NA	0.254	0.866	3.9	4.5	0.57
10343781	NA	0.215	0.856	4.9	5.5	0.57
10562169	Hamp	0.0124	0.577	13.3	13.9	0.57
10343980	NA	0.125	0.83	2.8	3.4	0.57
10340333	NA	0.16	0.842	4.7	5.2	0.57
10384539	Slc1a4	0.0114	0.567	7.1	7.6	0.57
10430319	Tst	0.0321	0.676	10.6	11.2	0.57
10342733	NA	0.167	0.847	4.5	5.1	0.57
10342245	NA	0.221	0.856	3.9	4.5	0.57
10495243	Gstm5	0.00261	0.366	7.9	8.5	0.57
10510286	Mad2l2	0.0312	0.672	9.3	9.9	0.57
10340130	NA	0.0766	0.786	3.3	3.8	0.57
10342082	NA	0.158	0.84	3.3	3.8	0.57
10343410	NA	0.041	0.699	6.5	7.1	0.57
10406417	Actg1	0.078	0.787	11.8	12.4	0.57
10359571	Fmo1	0.0022	0.343	12.1	12.6	0.57
10549532	NA	0.143	0.837	5.1	5.7	0.57
10340244	NA	0.0111	0.562	9.1	9.7	0.57
10344179	NA	0.24	0.861	6.2	6.7	0.57
10343625	NA	0.0793	0.789	2.7	3.2	0.56
10340982	NA	0.231	0.858	3.6	4.1	0.56
10342862	NA	0.0239	0.647	3.4	3.9	0.56
10584576	Hspa8	0.229	0.857	8.3	8.9	0.56
10572897	Hmox1	0.0204	0.641	8.5	9.1	0.56
10368606	Gm4794	0.00412	0.397	2.6	3.2	0.56
10405619	Idnk	0.0162	0.618	9.7	10.2	0.56
10338982	NA	0.088	0.799	3	3.5	0.56
10344314	NA	0.112	0.82	3.8	4.3	0.56
10338679	NA	0.014	0.59	3.8	4.4	0.56
10347277	Igfbp2	0.0223	0.645	11	11.6	0.56
10384572	Lgalsl	0.09	0.803	9.6	10.1	0.56
10341384	NA	0.192	0.851	5.1	5.6	0.56
10338660	NA	0.236	0.86	3.9	4.4	0.56
10342829	NA	0.00546	0.432	8.7	9.3	0.56
10371400	Cry1	0.017	0.62	7.7	8.2	0.56
10343188	NA	0.0519	0.737	4.4	5	0.56
10340666	NA	0.0878	0.799	2.7	3.2	0.56
10569024	Sigirr	0.000878	0.231	8.8	9.4	0.56
10338506	NA	0.0267	0.657	5	5.6	0.56
10344184	NA	0.0663	0.77	5.5	6.1	0.56
10364194	Lss	0.0745	0.783	10.5	11	0.56
10468533	Gpam	0.0978	0.81	11.7	12.3	0.56
10342584	NA	0.185	0.851	2.3	2.9	0.56
10338109	NA	0.223	0.856	4.5	5.1	0.56
10472846	Pdk1	0.00412	0.397	9.7	10.3	0.56
10559606	Tmem86b	0.0421	0.701	11.3	11.9	0.56
10341736	NA	0.0826	0.793	3.3	3.9	0.56
10338989	NA	0.147	0.838	3.1	3.6	0.56
10338634	NA	0.046	0.713	3.7	4.3	0.56
10556456	Tead1	0.0607	0.759	8.2	8.8	0.56
10460221	Chka	0.288	0.876	8.8	9.3	0.56
10343498	NA	0.402	0.903	4.5	5.1	0.56
10598079	NA	0.723	0.965	5.6	6.1	0.56
10341183	NA	0.119	0.823	5.3	5.8	0.56
10340114	NA	0.0734	0.781	4.9	5.5	0.56
10342607	NA	0.319	0.882	3.8	4.3	0.56
10542791	Ppfibp1	0.0291	0.669	8.5	9	0.55
10338718	NA	0.0236	0.647	6.3	6.9	0.55
10556442	Tead1	0.0622	0.76	8.1	8.6	0.55
10340085	NA	0.0636	0.766	3.4	3.9	0.55
10344363	NA	0.0819	0.793	6.1	6.6	0.55
10394776	NA	0.0946	0.808	10.1	10.6	0.55
10342501	NA	0.108	0.82	4.5	5.1	0.55
10338152	NA	0.157	0.84	5.2	5.7	0.55
10603746	Maob	0.000791	0.22	11.9	12.5	0.55
10343793	NA	0.0121	0.577	6.4	7	0.55
10456904	Pstpip2	0.0301	0.672	9	9.6	0.55
10409592	Lect2	0.000215	0.126	11.3	11.8	0.55
10338866	NA	0.178	0.851	3.5	4.1	0.55
10340926	NA	0.261	0.868	8	8.6	0.55
10382985	Afmid	0.000472	0.18	11.7	12.3	0.55
10340533	NA	0.0319	0.674	4.1	4.7	0.55
10340294	NA	0.0364	0.686	6.1	6.6	0.55
10502770	Lphn2	0.158	0.841	5.1	5.7	0.55
10341568	NA	0.12	0.826	4.5	5.1	0.55
10344164	NA	0.214	0.856	3.7	4.3	0.55
10341695	NA	0.296	0.877	5.9	6.4	0.55
10340320	NA	0.394	0.902	3	3.6	0.55
10338267	NA	0.0239	0.647	4.3	4.8	0.55
10341909	NA	0.0356	0.685	2.8	3.4	0.55
10341414	NA	0.475	0.918	4.1	4.7	0.55
10537318	Trim24	0.0392	0.693	7.9	8.4	0.55
10362428	Trdn	0.0406	0.699	5.3	5.8	0.55
10341462	NA	0.0646	0.769	4.1	4.7	0.55
10341212	NA	0.0748	0.783	2.6	3.1	0.55
10341809	NA	0.0539	0.748	2.9	3.5	0.55
10339832	NA	0.391	0.902	3.9	4.5	0.55
10481474	Crat	0.00761	0.489	10.3	10.9	0.55
10554789	Ctsc	0.0108	0.554	11.1	11.6	0.55
10343061	NA	0.0337	0.684	5.4	5.9	0.55
10474671	Spred1	0.0341	0.685	7.9	8.4	0.55
10338854	NA	0.0549	0.75	6.1	6.7	0.55
10398859	Adssl1	0.0234	0.647	8.5	9.1	0.54
10397364	Mfsd7c	0.0379	0.69	6.9	7.5	0.54
10340307	NA	0.425	0.907	6.5	7	0.54
10338526	NA	0.00499	0.429	2.6	3.2	0.54
10545224	NA	0.0164	0.62	3.1	3.7	0.54
10343181	NA	0.0356	0.685	4.5	5	0.54
10343923	NA	0.113	0.82	3.3	3.9	0.54
10338412	NA	0.17	0.847	4.8	5.4	0.54
10341216	NA	0.286	0.874	4.3	4.9	0.54
10528207	Cd36	0.123	0.828	8.9	9.5	0.54
10343139	NA	0.15	0.84	3.4	3.9	0.54
10362511	NA	0.0396	0.695	12	12.5	0.54
10339511	NA	0.000313	0.144	2.1	2.7	0.54
10389025	Myo1d	0.00331	0.385	8.6	9.2	0.54
10340228	NA	0.0377	0.689	6.8	7.4	0.54
10343650	NA	0.344	0.891	4.2	4.7	0.54
10342475	NA	0.141	0.836	4.2	4.7	0.54
10344217	NA	0.0201	0.641	2.8	3.4	0.54
10342114	NA	0.0805	0.79	2.6	3.1	0.54
10342049	NA	0.0874	0.799	4.1	4.6	0.54
10511429	Car8	0.00213	0.337	10.9	11.5	0.54
10341320	NA	0.0304	0.672	6.8	7.4	0.54
10601303	Chic1	0.142	0.836	6.7	7.2	0.54
10544885	Fkbp14	0.0187	0.629	7.4	7.9	0.54
10338907	NA	0.165	0.847	5.9	6.4	0.54
10341186	NA	0.173	0.848	5.6	6.1	0.54
10342922	NA	0.0204	0.641	2.8	3.4	0.54
10344349	NA	0.358	0.893	3	3.5	0.54
10342255	NA	0.38	0.898	4.3	4.8	0.54
10401418	NA	0.00932	0.528	6.3	6.8	0.54
10370000	Gstt1	0.0107	0.554	12.1	12.6	0.54
10365971	Btg1	0.015	0.604	10.8	11.3	0.54
10606001	Snx12	0.0131	0.583	7.8	8.3	0.53
10338591	NA	0.0817	0.793	6.1	6.6	0.53
10338425	NA	0.147	0.838	6.7	7.2	0.53
10339639	NA	0.202	0.851	5.5	6	0.53
10542275	Etv6	0.213	0.856	8.6	9.1	0.53
10338946	NA	0.259	0.868	5.2	5.7	0.53
10473022	Plp2	0.00506	0.429	7.1	7.6	0.53
10442396	Abca3	0.0116	0.57	9.4	9.9	0.53
10604735	Rbmx	0.0263	0.657	7.7	8.2	0.53
10338160	NA	0.0451	0.712	7.2	7.7	0.53
10563766	NA	0.00282	0.372	5.6	6.1	0.53
10343330	NA	0.0816	0.793	3.1	3.6	0.53
10430006	Slc39a4	0.118	0.823	10.2	10.7	0.53
10343667	NA	0.0523	0.74	4.9	5.4	0.53
10344457	NA	0.274	0.872	3.8	4.4	0.53
10371970	Amdhd1	0.0101	0.54	11	11.6	0.53
10340161	NA	0.0206	0.641	5.9	6.4	0.53
10343478	NA	0.185	0.851	4.9	5.4	0.53
10341547	NA	0.233	0.859	6.1	6.6	0.53
10343584	NA	0.009	0.521	10.4	11	0.53
10339219	NA	0.0202	0.641	2.5	3	0.53
10341924	NA	0.0226	0.645	4.2	4.7	0.53
10604906	Ids	0.0319	0.674	8.4	8.9	0.53
10341037	NA	0.0493	0.725	2.4	3	0.53
10341961	NA	0.132	0.834	4.8	5.3	0.53
10340357	NA	0.474	0.918	4.9	5.4	0.53
10396936	Smoc1	0.00329	0.385	10.8	11.4	0.53
10339827	NA	0.113	0.82	4.1	4.6	0.53
10344461	NA	0.133	0.834	6.8	7.4	0.53
10343740	NA	0.203	0.851	4.7	5.2	0.53
10343898	NA	0.00398	0.393	3	3.6	0.53
10343047	NA	0.0538	0.748	2.2	2.7	0.53
10338308	NA	0.399	0.903	5.1	5.6	0.53
10340705	NA	0.276	0.873	4.3	4.8	0.53
10339256	NA	0.361	0.893	4.7	5.2	0.52
10339858	NA	0.0205	0.641	3.4	3.9	0.52
10344143	NA	0.156	0.84	5.6	6.1	0.52
10344581	NA	0.376	0.897	5	5.5	0.52
10493484	Krtcap2	0.00643	0.455	10.8	11.4	0.52
10340914	NA	0.0261	0.656	5.3	5.8	0.52
10549536	Amn1	0.0287	0.666	7.2	7.7	0.52
10495993	Elovl6	0.141	0.836	11.8	12.4	0.52
10342438	NA	0.0615	0.759	3.7	4.2	0.52
10341003	NA	0.145	0.837	5.1	5.7	0.52
10338323	NA	0.155	0.84	4.1	4.6	0.52
10339370	NA	0.00366	0.389	6.1	6.6	0.52
10340221	NA	0.00487	0.429	6	6.5	0.52
10409278	Nfil3	0.208	0.852	9.2	9.7	0.52
10562320	NA	0.0034	0.385	8.3	8.8	0.52
10340184	NA	0.148	0.838	2.6	3.1	0.52
10340374	NA	0.303	0.879	4.2	4.7	0.52
10539990	Uroc1	0.00167	0.294	11	11.5	0.52
10604922	BC023829	0.00469	0.425	8.9	9.4	0.52
10340986	NA	0.233	0.859	4.3	4.8	0.52
10340527	NA	0.363	0.895	4	4.5	0.52
10505008	Slc44a1	0.00947	0.532	10	10.5	0.52
10541333	Slc6a12	0.0219	0.642	11.4	11.9	0.52
10339865	NA	0.0407	0.699	5.8	6.3	0.52
10338391	NA	0.0605	0.759	4	4.5	0.52
10343878	NA	0.069	0.77	7	7.5	0.52
10339311	NA	0.161	0.842	6.9	7.4	0.52
10343754	NA	0.183	0.851	3.6	4.2	0.52
10339775	NA	0.00119	0.261	7.5	8	0.51
10343858	NA	0.0725	0.778	5.4	5.9	0.51
10338369	NA	0.18	0.851	4.6	5.1	0.51
10344426	NA	0.196	0.851	7.6	8.1	0.51
10342493	NA	0.000176	0.119	5.8	6.3	0.51
10339260	NA	0.0206	0.641	5.9	6.4	0.51
10553913	Mcee	0.0278	0.665	11.7	12.2	0.51
10480725	BC029214	0.0494	0.725	9.9	10.4	0.51
10517609	Cda	0.0656	0.77	9.8	10.3	0.51
10340987	NA	0.112	0.82	3.1	3.6	0.51
10342908	NA	0.196	0.851	2.2	2.7	0.51
10339983	NA	0.375	0.897	3.7	4.2	0.51
10360631	Adck3	0.0517	0.736	11.7	12.2	0.51
10341777	NA	0.0537	0.748	9.5	10	0.51
10499529	Slc50a1	0.0784	0.788	9	9.5	0.51
10403584	Nid1	0.134	0.835	8.1	8.6	0.51
10530806	Ppat	0.000599	0.192	8.6	9.1	0.51
10494445	Lix1l	0.0207	0.641	7.8	8.3	0.51
10341583	NA	0.0619	0.759	3.2	3.7	0.51
10394471	Sdc1	0.000304	0.142	11.4	11.9	0.51
10338639	NA	0.0156	0.611	6.1	6.6	0.51
10343891	NA	0.0038	0.389	2.3	2.8	0.51
10404731	Tmem14c	0.0378	0.69	9.8	10.4	0.51
10342935	NA	0.0664	0.77	3.8	4.4	0.51
10339362	NA	0.0215	0.641	3.5	4	0.51
10343551	NA	0.315	0.881	2.9	3.5	0.51
10583426	Olfr859	0.0739	0.782	3.1	3.6	0.51
10338943	NA	0.0883	0.799	4	4.5	0.51
10342315	NA	0.221	0.856	3.1	3.6	0.51
10338626	NA	0.273	0.872	4.1	4.6	0.51
10343507	NA	0.281	0.873	5.3	5.8	0.51
10369890	NA	0.000655	0.203	7.4	7.9	0.51
10398996	Crip2	0.00519	0.429	10.4	10.9	0.51
10340831	NA	0.0159	0.614	5.6	6.1	0.51
10342068	NA	0.135	0.835	5	5.5	0.51
10343751	NA	0.207	0.852	3	3.6	0.51
10343558	NA	0.236	0.86	3.2	3.7	0.51
10342039	NA	0.398	0.903	4.1	4.6	0.51
10441254	Tmprss2	0.000199	0.119	7.2	7.7	0.51
10339177	NA	0.0442	0.71	10.3	10.8	0.51
10341965	NA	0.308	0.881	3	3.5	0.51
10398069	Serpina3m	0.00011	0.0903	12.6	13.1	0.5
10342357	NA	0.0622	0.76	4.1	4.6	0.5
10342182	NA	0.0996	0.811	3	3.5	0.5
10340377	NA	0.141	0.836	3.8	4.3	0.5
10340956	NA	0.0215	0.641	9.1	9.6	0.5
10401181	Rdh11	0.038	0.69	10.5	11	0.5
10369806	1700040L02Rik	0.105	0.818	6.9	7.4	0.5
10338194	NA	0.197	0.851	4.4	4.9	0.5
10341461	NA	0.208	0.852	3.8	4.3	0.5
10338420	NA	0.403	0.903	4.2	4.7	0.5
10360328	Apcs	0.0341	0.685	10.7	11.2	0.5
10527494	NA	0.127	0.83	11.1	11.6	0.5
10339293	NA	0.203	0.851	5.6	6.1	0.5
10340679	NA	0.336	0.888	3.4	3.9	0.5
10403761	NA	0.00284	0.372	5.3	5.8	0.5
10407912	NA	0.00284	0.372	5.3	5.8	0.5
10342448	NA	0.0178	0.62	6.1	6.6	0.5
10340667	NA	0.328	0.885	2.9	3.4	0.5
10479902	Dhtkd1	0.00509	0.429	9.4	9.9	0.5
10344421	NA	0.121	0.827	5.7	6.2	0.5
10556487	NA	0.105	0.816	6.3	6.8	0.5
10428439	NA	0.131	0.834	3.3	3.8	0.5
10338307	NA	0.195	0.851	2.8	3.3	0.5
10599956	NA	0.00141	0.273	9.8	10.3	0.5
10604996	NA	0.31	0.881	6.3	6.8	0.5
10344381	NA	0.337	0.888	3.8	4.3	0.5
10344036	NA	0.0299	0.672	3.6	4.1	0.5
10525942	Glt1d1	0.00887	0.52	8.6	9.1	0.5
10339843	NA	0.0344	0.685	2.3	2.8	0.5
10358476	Prg4	0.04	0.696	9.9	10.4	0.5
10340396	NA	0.086	0.797	5.4	5.9	0.5
10349431	Acmsd	0.164	0.846	10	10.5	0.5
10597935	Cdcp1	0.048	0.723	7.1	7.6	0.5
10339997	NA	0.0576	0.755	5.5	6	0.49
10338363	NA	0.118	0.823	5.4	5.9	0.49
10344427	NA	0.283	0.873	4.7	5.2	0.49
10451818	Sult1c2	0.0357	0.685	7.2	7.7	0.49
10598403	Praf2	0.0375	0.689	7.2	7.7	0.49
10340477	NA	0.193	0.851	4.5	5	0.49
10342038	NA	0.369	0.895	3.5	4	0.49
10344243	NA	0.373	0.896	3.9	4.3	0.49
10363070	Gp49a	0.00043	0.174	6.3	6.8	0.49
10342600	NA	0.0038	0.389	2.4	2.9	0.49
10344218	NA	0.47	0.918	6.6	7.1	0.49
10463068	NA	0.0025	0.364	11.7	12.2	0.49
10548563	NA	0.00256	0.365	11.4	11.9	0.49
10341807	NA	0.0254	0.652	5.8	6.2	0.49
10341387	NA	0.218	0.856	6.8	7.3	0.49
10343515	NA	0.22	0.856	2.8	3.3	0.49
10340247	NA	0.305	0.88	3.1	3.6	0.49
10487269	Usp50	0.0302	0.672	5.2	5.7	0.49
10343254	NA	0.0418	0.7	1.8	2.3	0.49
10344592	NA	0.0611	0.759	4.9	5.4	0.49
10469312	Pter	0.0655	0.77	10.4	10.9	0.49
10344435	NA	0.312	0.881	2.9	3.4	0.49
10342791	NA	0.323	0.882	3.3	3.8	0.49
10548679	NA	0.0138	0.589	4.1	4.6	0.49
10479852	Camk1d	0.0726	0.778	9.9	10.4	0.49
10339231	NA	0.302	0.879	4.6	5.1	0.49
10340501	NA	0.311	0.881	4.7	5.2	0.49
10409276	NA	0.0499	0.726	5	5.5	0.49
10340885	NA	0.0551	0.752	2.8	3.3	0.49
10341946	NA	0.125	0.83	5.1	5.6	0.49
10408629	Pxdc1	0.0233	0.647	10.2	10.7	0.49
10583465	Ubl5	0.0633	0.765	11	11.5	0.49
10343228	NA	0.0985	0.81	4	4.5	0.49
10506335	Pde4b	0.128	0.831	7.2	7.7	0.49
10531100	Sult1d1	0.0483	0.724	11.7	12.2	0.49
10344424	NA	0.234	0.859	3.8	4.3	0.49
10340796	NA	0.27	0.872	2.9	3.3	0.49
10591576	Dock6	0.0269	0.658	8.1	8.6	0.49
10591208	NA	0.0273	0.662	12.2	12.7	0.49
10416004	Zfp395	0.0329	0.678	7.4	7.9	0.49
10342550	NA	0.0764	0.785	4.5	5	0.49
10343496	NA	0.111	0.82	5.8	6.3	0.49
10343450	NA	0.22	0.856	4.9	5.4	0.49
10343742	NA	0.27	0.872	5.6	6	0.49
10344182	NA	0.299	0.879	4.7	5.2	0.49
10341816	NA	0.029	0.669	5.5	6	0.49
10344522	NA	0.169	0.847	4.5	5	0.49
10340827	NA	0.318	0.882	6	6.5	0.49
10437639	Emp2	0.00887	0.52	8.1	8.6	0.48
10342874	NA	0.0566	0.754	3.2	3.7	0.48
10338517	NA	0.0938	0.808	7.6	8.1	0.48
10344513	NA	0.118	0.823	4.3	4.7	0.48
10338389	NA	0.437	0.911	3.8	4.3	0.48
10553354	Nav2	0.0184	0.626	7.8	8.3	0.48
10548030	Cd9	0.0523	0.74	8.1	8.6	0.48
10339096	NA	0.332	0.886	5.2	5.7	0.48
10480734	Ptgds	0.00395	0.393	7.7	8.2	0.48
10338333	NA	0.266	0.87	4.3	4.7	0.48
10466530	Pcsk5	0.015	0.604	7.8	8.3	0.48
10343543	NA	0.0334	0.682	6.3	6.8	0.48
10344047	NA	0.0368	0.688	4.2	4.7	0.48
10493114	Nes	0.0604	0.759	6	6.5	0.48
10344347	NA	0.226	0.857	5.4	5.9	0.48
10339344	NA	0.293	0.877	7	7.4	0.48
10532267	Vmn2r9	0.0145	0.597	4	4.4	0.48
10342362	NA	0.112	0.82	3.2	3.6	0.48
10344246	NA	0.141	0.836	5.7	6.2	0.48
10415045	Mrpl52	0.0437	0.708	9.6	10	0.48
10576971	Irs2	0.0502	0.726	8.6	9.1	0.48
10462587	Stambpl1	0.0555	0.754	6.4	6.9	0.48
10344249	NA	0.122	0.828	2.4	2.9	0.48
10340381	NA	0.213	0.856	3.4	3.8	0.48
10344477	NA	0.364	0.895	4.2	4.7	0.48
10342808	NA	0.145	0.837	4.6	5.1	0.48
10442493	NA	0.319	0.882	5.7	6.2	0.48
10340892	NA	0.0283	0.665	5.2	5.7	0.48
10595622	NA	0.161	0.842	7.2	7.6	0.48
10595636	9430037G07Rik	0.161	0.842	7.2	7.6	0.48
10338173	NA	0.304	0.879	6.4	6.9	0.48
10342355	NA	0.362	0.894	4.5	5	0.48
10343329	NA	0.0704	0.775	6.2	6.7	0.48
10344138	NA	0.17	0.847	3.7	4.2	0.48
10340611	NA	0.0295	0.672	1.9	2.4	0.48
10469575	NA	0.00202	0.329	11.4	11.9	0.48
10342141	NA	0.142	0.836	4.4	4.9	0.48
10343500	NA	0.452	0.912	5	5.5	0.48
10338611	NA	0.0725	0.778	2.8	3.2	0.47
10344374	NA	0.0998	0.812	3.1	3.6	0.47
10341025	NA	0.138	0.836	3.4	3.9	0.47
10559297	Slc22a18	0.00908	0.522	11	11.4	0.47
10341315	NA	0.0166	0.62	4	4.5	0.47
10338469	NA	0.0266	0.657	2.9	3.4	0.47
10338771	NA	0.0474	0.721	4.1	4.6	0.47
10605256	Flna	0.0563	0.754	8.2	8.7	0.47
10339226	NA	0.0654	0.77	2.6	3.1	0.47
10343390	NA	0.0941	0.808	2.8	3.3	0.47
10343202	NA	0.231	0.858	6.7	7.2	0.47
10430825	Cenpm	0.0145	0.597	7.4	7.9	0.47
10341111	NA	0.137	0.835	2.8	3.2	0.47
10343586	NA	0.283	0.873	2.5	3	0.47
10340631	NA	0.463	0.915	3.9	4.4	0.47
10373634	Olfr803	0.0157	0.611	2.9	3.4	0.47
10389894	Abcc3	0.0382	0.691	11.1	11.6	0.47
10343349	NA	0.102	0.814	3.1	3.6	0.47
10339199	NA	0.116	0.821	2.4	2.9	0.47
10407124	Pde4d	0.142	0.836	6.1	6.5	0.47
10338700	NA	0.316	0.881	5.8	6.2	0.47
10502191	Ostc	0.0227	0.646	11	11.4	0.47
10340007	NA	0.092	0.807	5.1	5.6	0.47
10339158	NA	0.133	0.834	6.6	7.1	0.47
10344241	NA	0.153	0.84	9.8	10.3	0.47
10338602	NA	0.176	0.849	4.5	5	0.47
10343628	NA	0.241	0.862	2.6	3	0.47
10339136	NA	0.237	0.86	5.2	5.6	0.47
10338069	NA	0.385	0.9	4.8	5.3	0.47
10447079	Rmdn2	0.0161	0.618	5.6	6.1	0.47
10339681	NA	0.0885	0.8	5.3	5.8	0.47
10342996	NA	0.112	0.82	3.9	4.4	0.47
10601312	Chic1	0.171	0.848	7.8	8.2	0.47
10553521	Gas2	0.0134	0.585	9.3	9.8	0.47
10501734	Palmd	0.0268	0.658	10.7	11.2	0.47
10343571	NA	0.197	0.851	5.8	6.2	0.47
10343873	NA	0.19	0.851	4	4.5	0.47
10339479	NA	0.00822	0.502	6.6	7.1	0.47
10348076	NA	0.0235	0.647	5.8	6.3	0.47
10362201	Ctgf	0.0264	0.657	9.2	9.7	0.47
10352133	Efcab2	0.0065	0.459	6.4	6.9	0.47
10340359	NA	0.0478	0.723	4.3	4.8	0.47
10388834	Slc13a2	0.173	0.848	7.2	7.7	0.47
10517081	NA	0.00615	0.449	8.7	9.2	0.47
10523095	Afm	0.0654	0.77	10.3	10.7	0.47
10338150	NA	0.108	0.82	10.1	10.5	0.47
10341250	NA	0.193	0.851	6.6	7.1	0.47
10340525	NA	0.303	0.879	3.9	4.4	0.47
10339167	NA	0.379	0.897	2.8	3.3	0.47
10342615	NA	0.0031	0.378	3	3.5	0.46
10477649	Acss2	0.0294	0.672	12	12.5	0.46
10339029	NA	0.0859	0.797	5.9	6.4	0.46
10339281	NA	0.0942	0.808	2.6	3	0.46
10344438	NA	0.161	0.842	2.3	2.7	0.46
10578149	Leprotl1	0.00719	0.482	9.1	9.5	0.46
10551226	NA	0.12	0.826	12.2	12.6	0.46
10460253	NA	0.0316	0.673	5.6	6.1	0.46
10434758	St6gal1	0.00288	0.373	9.7	10.2	0.46
10338254	NA	0.0305	0.672	7.8	8.3	0.46
10340014	NA	0.0448	0.712	4.6	5.1	0.46
10408200	NA	0.0843	0.794	8.1	8.6	0.46
10338297	NA	0.204	0.851	5.8	6.2	0.46
10342497	NA	0.556	0.934	3.5	4	0.46
10403352	Klf6	0.0513	0.734	7.7	8.2	0.46
10340000	NA	0.0549	0.751	4	4.4	0.46
10344511	NA	0.237	0.86	4.9	5.3	0.46
10340743	NA	0.256	0.867	4.5	4.9	0.46
10339269	NA	0.535	0.929	5.8	6.3	0.46
10339032	NA	0.0153	0.606	2.8	3.2	0.46
10343536	NA	0.0537	0.748	5.4	5.8	0.46
10338483	NA	0.133	0.834	6.6	7	0.46
10339116	NA	0.566	0.936	3.4	3.9	0.46
10345926	NA	0.0297	0.672	7.7	8.2	0.46
10340686	NA	0.106	0.818	6.5	7	0.46
10409259	NA	0.137	0.835	6.8	7.3	0.46
10342332	NA	0.185	0.851	9.4	9.9	0.46
10388938	Wsb1	0.309	0.881	8.6	9	0.46
10341165	NA	0.327	0.885	4	4.4	0.46
10341114	NA	0.147	0.838	5.1	5.6	0.46
10342109	NA	0.427	0.907	4.6	5.1	0.46
10438681	Kng2	0.000852	0.231	12.6	13.1	0.46
10339995	NA	0.0216	0.641	6	6.4	0.46
10338855	NA	0.00347	0.388	4.5	4.9	0.46
10464045	Acsl5	0.0215	0.641	11.7	12.2	0.46
10559233	Mrpl23	0.0324	0.677	10.3	10.8	0.46
10339562	NA	0.148	0.838	3.7	4.1	0.46
10343147	NA	0.313	0.881	3	3.4	0.46
10359870	Pbx1	0.0046	0.42	8.3	8.8	0.45
10586491	Dapk2	0.0174	0.62	7.4	7.9	0.45
10383799	Tcn2	0.0196	0.638	11.6	12.1	0.45
10552824	Rras	0.0501	0.726	10.7	11.1	0.45
10338975	NA	0.0957	0.808	3	3.5	0.45
10343136	NA	0.11	0.82	5	5.4	0.45
10467400	Cyp2c54	0.00369	0.389	12.2	12.6	0.45
10420209	Cbln3	0.00705	0.478	6.5	7	0.45
10528008	Steap2	0.0138	0.589	7.9	8.4	0.45
10591563	Kank2	0.0166	0.62	8.5	8.9	0.45
10339706	NA	0.109	0.82	5.7	6.1	0.45
10350136	Csrp1	0.17	0.847	9	9.5	0.45
10339361	NA	0.301	0.879	5.5	5.9	0.45
10371770	Gas2l3	0.0488	0.724	7	7.5	0.45
10339613	NA	0.0566	0.754	7.6	8.1	0.45
10512847	Alg2	0.193	0.851	8.6	9	0.45
10343174	NA	0.292	0.877	3.6	4.1	0.45
10533367	Acad10	0.000112	0.0903	8	8.4	0.45
10522467	Rasl11b	0.00313	0.379	6.6	7	0.45
10343044	NA	0.0677	0.77	2.5	3	0.45
10344582	NA	0.153	0.84	4	4.4	0.45
10340528	NA	0.229	0.857	5.8	6.2	0.45
10509204	Tcea3	0.00259	0.365	9.9	10.3	0.45
10353707	NA	0.00314	0.379	11.7	12.2	0.45
10562480	Nudt19	0.00453	0.417	9.6	10	0.45
10341784	NA	0.00818	0.502	4.6	5.1	0.45
10340788	NA	0.0688	0.77	8.4	8.8	0.45
10450819	Znrd1	0.0915	0.806	8.1	8.6	0.45
10338357	NA	0.0964	0.81	3	3.4	0.45
10531415	Cxcl10	0.127	0.83	7.1	7.5	0.45
10343912	NA	0.36	0.893	2.7	3.1	0.45
10460591	Fibp	0.0142	0.593	8.3	8.8	0.45
10341244	NA	0.091	0.805	2.5	2.9	0.45
10466622	C730037M02Rik	0.116	0.821	6.3	6.7	0.45
10342971	NA	0.133	0.834	5.2	5.6	0.45
10343527	NA	0.178	0.851	2.2	2.7	0.45
10343910	NA	0.445	0.912	5.1	5.6	0.45
10485388	Ldlrad3	0.0116	0.57	9	9.4	0.45
10361828	Cited2	0.0181	0.623	9.7	10.2	0.45
10343226	NA	0.0225	0.645	7.5	8	0.45
10483786	Mrpl23	0.0296	0.672	10.3	10.8	0.45
10578829	Palld	0.0931	0.807	7.7	8.2	0.45
10343425	NA	0.249	0.863	4.9	5.4	0.45
10340526	NA	0.261	0.869	4.5	4.9	0.45
10341102	NA	0.266	0.87	6.7	7.2	0.45
10342586	NA	0.282	0.873	4.2	4.7	0.45
10343538	NA	0.428	0.907	4.5	4.9	0.45
10465580	Nudt22	0.0165	0.62	8.5	9	0.45
10477169	Id1	0.0194	0.636	7.5	7.9	0.45
10339233	NA	0.176	0.849	6	6.4	0.45
10342327	NA	0.202	0.851	5.6	6	0.45
10338216	NA	0.301	0.879	6.8	7.3	0.45
10339834	NA	0.334	0.886	3.2	3.7	0.45
10340449	NA	0.562	0.935	5.7	6.2	0.45
10434782	Lpp	0.0308	0.672	9.2	9.7	0.45
10402353	Ifi27l2b	0.0316	0.673	7.8	8.2	0.45
10339428	NA	0.0344	0.685	4.7	5.1	0.45
10339413	NA	0.184	0.851	3.7	4.1	0.45
10341331	NA	0.269	0.872	4.4	4.9	0.45
10467153	Slc16a12	0.0457	0.712	9.9	10.4	0.45
10341983	NA	0.135	0.835	2.9	3.4	0.45
10342470	NA	0.25	0.863	5.2	5.6	0.45
10467489	NA	0.00276	0.371	11.7	12.2	0.45
10474915	Gchfr	0.0268	0.658	10.9	11.3	0.45
10558769	Ifitm1	0.034	0.685	8.3	8.8	0.45
10493990	NA	0.0536	0.748	9.4	9.9	0.45
10341703	NA	0.124	0.829	5	5.4	0.45
10344263	NA	0.242	0.862	5.2	5.6	0.45
10340204	NA	0.244	0.862	5.4	5.9	0.45
10339896	NA	0.255	0.866	4.7	5.1	0.45
10343874	NA	0.423	0.907	4.9	5.4	0.45
10339113	NA	0.04	0.696	3.5	3.9	0.45
10339148	NA	0.0591	0.756	9.1	9.6	0.45
10342445	NA	0.114	0.82	4.1	4.5	0.44
10341035	NA	0.124	0.828	2.4	2.8	0.44
10338118	NA	0.228	0.857	3.7	4.1	0.44
10343513	NA	0.414	0.906	3.5	3.9	0.44
10341647	NA	0.428	0.908	5.8	6.2	0.44
10338939	NA	0.429	0.908	4.8	5.2	0.44
10586368	Clpx	0.438	0.911	10.7	11.1	0.44
10447239	Abcg8	0.0092	0.523	9.9	10.4	0.44
10387807	NA	0.0221	0.644	8.9	9.4	0.44
10341117	NA	0.0341	0.685	6.2	6.6	0.44
10344097	NA	0.12	0.826	4.2	4.6	0.44
10339831	NA	0.142	0.836	4.3	4.7	0.44
10343848	NA	0.327	0.885	5	5.4	0.44
10549055	NA	0.0148	0.6	3.1	3.6	0.44
10339399	NA	0.0191	0.632	2.8	3.2	0.44
10340404	NA	0.144	0.837	5.8	6.3	0.44
10403052	NA	0.00432	0.41	7	7.4	0.44
10422164	Ednrb	0.00728	0.484	8.5	9	0.44
10439442	Pla1a	0.0133	0.585	9.3	9.8	0.44
10585610	Ptpn9	0.0503	0.727	8.8	9.2	0.44
10358535	Hmcn1	0.0684	0.77	5	5.5	0.44
10340817	NA	0.128	0.831	2.6	3	0.44
10338613	NA	0.275	0.873	4	4.4	0.44
10342211	NA	0.358	0.893	3	3.4	0.44
10344571	NA	0.409	0.905	3.5	4	0.44
10339998	NA	0.421	0.907	4.8	5.3	0.44
10532164	Atp5k	0.0449	0.712	8.3	8.8	0.44
10340056	NA	0.0525	0.741	5	5.5	0.44
10343569	NA	0.0837	0.793	6	6.4	0.44
10338443	NA	0.195	0.851	3.8	4.3	0.44
10338133	NA	0.00533	0.429	5.2	5.7	0.44
10340506	NA	0.103	0.816	4.8	5.3	0.44
10341691	NA	0.548	0.932	5.1	5.6	0.44
10342225	NA	0.0189	0.631	6.3	6.7	0.44
10342421	NA	0.0652	0.77	3.9	4.3	0.44
10415991	Zfp395	0.0174	0.62	8.5	8.9	0.44
10395770	NA	0.0196	0.638	8.1	8.5	0.44
10395780	NA	0.0196	0.638	8.1	8.5	0.44
10340151	NA	0.364	0.895	3.4	3.8	0.44
10343825	NA	0.366	0.895	2.9	3.3	0.44
10385699	Rmnd5b	0.00893	0.52	9.1	9.6	0.44
10440993	Rcan1	0.00926	0.525	9	9.4	0.44
10344524	NA	0.0952	0.808	2.6	3	0.44
10338740	NA	0.154	0.84	5.3	5.8	0.44
10338716	NA	0.194	0.851	4.8	5.2	0.44
10538150	Tmem176a	0.00339	0.385	10.3	10.7	0.43
10341044	NA	0.057	0.754	2.8	3.2	0.43
10343034	NA	0.126	0.83	6	6.4	0.43
10341904	NA	0.243	0.862	4.7	5.2	0.43
10338701	NA	0.394	0.903	4.6	5.1	0.43
10341045	NA	0.0125	0.578	3.4	3.8	0.43
10339297	NA	0.0183	0.624	9	9.4	0.43
10374908	Rtn4	0.0305	0.672	7.8	8.2	0.43
10343433	NA	0.0385	0.692	5.8	6.3	0.43
10378549	Rtn4rl1	0.0426	0.703	8.5	9	0.43
10342110	NA	0.0577	0.755	5	5.5	0.43
10344148	NA	0.131	0.834	3.1	3.5	0.43
10344303	NA	0.254	0.866	4	4.4	0.43
10377215	Gas7	0.0795	0.789	7.8	8.3	0.43
10341791	NA	0.0889	0.801	3.6	4.1	0.43
10343162	NA	0.138	0.836	5.2	5.7	0.43
10339525	NA	0.224	0.856	4.4	4.8	0.43
10344177	NA	0.0568	0.754	4	4.4	0.43
10339505	NA	0.00124	0.264	5.8	6.3	0.43
10603177	NA	0.00882	0.52	11.7	12.1	0.43
10338437	NA	0.013	0.583	10.7	11.1	0.43
10594762	Fam81a	0.0327	0.677	6.8	7.3	0.43
10338966	NA	0.0443	0.71	5.2	5.6	0.43
10338597	NA	0.0597	0.758	3.3	3.7	0.43
10343753	NA	0.119	0.823	9.7	10.1	0.43
10526179	Rpl28	0.0279	0.665	12.6	13	0.43
10338962	NA	0.0663	0.77	2.1	2.6	0.43
10340770	NA	0.129	0.831	7.8	8.2	0.43
10342773	NA	0.184	0.851	6.3	6.7	0.43
10385966	Anxa6	0.00286	0.372	10.7	11.1	0.43
10342134	NA	0.0177	0.62	7.7	8.1	0.43
10343683	NA	0.0674	0.77	5.4	5.8	0.43
10516275	Rpl28	0.0302	0.672	12.7	13.1	0.43
10344466	NA	0.15	0.84	7.3	7.8	0.43
10389719	Scpep1	0.00116	0.261	10.4	10.8	0.43
10341218	NA	0.0236	0.647	6.8	7.2	0.43
10341954	NA	0.0243	0.649	4.6	5	0.43
10500133	Prune	0.102	0.815	9	9.4	0.43
10344505	NA	0.137	0.835	9.4	9.9	0.43
10581011	NA	0.444	0.912	3.3	3.8	0.43
10587748	Adamts7	0.00574	0.437	7.7	8.1	0.43
10349478	Rpl28	0.0299	0.672	12.7	13.1	0.43
10496727	Ddah1	0.0497	0.726	11.9	12.3	0.43
10535714	Cyp3a25	0.0867	0.798	12.7	13.1	0.43
10340716	NA	0.105	0.818	8.4	8.8	0.43
10590438	Fam198a	0.151	0.84	8.8	9.2	0.43
10344460	NA	0.154	0.84	2.5	2.9	0.43
10340537	NA	0.171	0.847	10	10.5	0.43
10605034	NA	0.236	0.86	3.8	4.3	0.43
10338735	NA	0.401	0.903	2.8	3.2	0.43
10340142	NA	0.535	0.929	4.4	4.8	0.43
10582658	Agt	4.87e-05	0.0697	13.1	13.6	0.43
10466976	Gldc	0.0392	0.693	11.4	11.8	0.43
10408331	Acot13	0.00341	0.385	9.8	10.2	0.43
10403945	NA	0.0122	0.577	6.6	7	0.43
10342681	NA	0.0422	0.701	12.1	12.5	0.43
10445325	Rcan2	0.0727	0.778	7.1	7.5	0.43
10341338	NA	0.123	0.828	8	8.4	0.43
10342177	NA	0.154	0.84	5	5.4	0.43
10338509	NA	0.204	0.851	7	7.4	0.43
10340691	NA	0.293	0.877	5.6	6.1	0.43
10341260	NA	0.402	0.903	4.4	4.8	0.43
10349968	Chil1	0.0567	0.754	6.2	6.6	0.42
10344507	NA	0.0697	0.771	4.6	5	0.42
10378570	NA	0.0783	0.787	8.8	9.3	0.42
10343457	NA	0.239	0.86	5.3	5.7	0.42
10343012	NA	0.253	0.866	5.5	5.9	0.42
10338676	NA	0.0726	0.778	2.4	2.9	0.42
10353010	Mybl1	0.148	0.838	4.7	5.1	0.42
10339602	NA	0.158	0.84	5.4	5.8	0.42
10341537	NA	0.227	0.857	3.6	4	0.42
10501699	Agl	0.0011	0.258	9	9.5	0.42
10599736	Fhl1	0.00537	0.429	8	8.4	0.42
10338533	NA	0.0543	0.749	7.4	7.8	0.42
10338893	NA	0.128	0.831	5.6	6	0.42
10464819	NA	0.15	0.84	7.6	8	0.42
10343657	NA	0.239	0.86	3.7	4.1	0.42
10518329	NA	0.0244	0.649	12.5	12.9	0.42
10341626	NA	0.0615	0.759	2.3	2.7	0.42
10343597	NA	0.0678	0.77	5.9	6.3	0.42
10359689	Atp1b1	0.11	0.82	11.1	11.5	0.42
10355500	Igfbp5	0.187	0.851	7.5	7.9	0.42
10344595	NA	0.155	0.84	5.5	5.9	0.42
10344264	NA	0.237	0.86	5.9	6.3	0.42
10395142	Sh3yl1	0.0136	0.587	6.4	6.8	0.42
10340329	NA	0.0225	0.645	7	7.4	0.42
10342672	NA	0.0502	0.726	4.6	5	0.42
10338868	NA	0.181	0.851	5.3	5.7	0.42
10531631	NA	0.203	0.851	4.6	5	0.42
10344280	NA	0.224	0.856	6.3	6.7	0.42
10343679	NA	0.324	0.882	6.8	7.2	0.42
10339037	NA	0.0434	0.708	6.5	6.9	0.42
10342348	NA	0.0599	0.759	3.8	4.2	0.42
10339668	NA	0.171	0.848	5.2	5.6	0.42
10349174	Serpinb8	0.00594	0.439	6.2	6.6	0.42
10436282	Impg2	0.0492	0.724	5.6	6	0.42
10351304	Mpc2	0.0568	0.754	10.7	11.1	0.42
10342447	NA	0.0884	0.799	7.6	8	0.42
10385814	Leap2	0.089	0.801	8.3	8.7	0.42
10465005	Banf1	0.121	0.827	10.8	11.2	0.42
10341711	NA	0.162	0.843	4.7	5.1	0.42
10572282	Hapln4	0.0625	0.761	7.8	8.3	0.42
10376007	Shroom1	0.0872	0.799	9.4	9.8	0.42
10521134	NA	0.104	0.816	10	10.4	0.42
10391454	Vat1	0.132	0.834	9.5	9.9	0.42
10340972	NA	0.188	0.851	3	3.4	0.42
10406270	Glrx	0.0126	0.579	9.9	10.3	0.42
10461629	Ms4a4d	0.0264	0.657	7.6	8	0.42
10449295	NA	0.0276	0.663	11	11.4	0.42
10500204	Ecm1	0.0359	0.686	11.1	11.5	0.42
10341893	NA	0.0412	0.699	4.5	5	0.42
10379153	Aldoc	0.047	0.72	9.5	9.9	0.42
10340933	NA	0.0877	0.799	5.5	6	0.42
10338737	NA	0.151	0.84	4.2	4.6	0.42
10342091	NA	0.249	0.863	5.3	5.8	0.42
10340132	NA	0.261	0.869	6.2	6.7	0.42
10522668	Paics	0.000542	0.191	12.4	12.8	0.41
10370013	Gstt2	0.017	0.62	8.5	8.9	0.41
10559673	Tmem238	0.0315	0.673	9.2	9.6	0.41
10457640	NA	0.0816	0.793	9.4	9.8	0.41
10596465	Acy1	0.213	0.856	9.1	9.5	0.41
10340889	NA	0.265	0.87	4.5	4.9	0.41
10344238	NA	0.282	0.873	4.5	4.9	0.41
10338650	NA	0.286	0.874	5.7	6.1	0.41
10340884	NA	0.234	0.859	5.8	6.2	0.41
10340593	NA	0.358	0.893	3.7	4.2	0.41
10340303	NA	0.385	0.901	4.1	4.5	0.41
10392464	Fam20a	0.00897	0.52	9.4	9.8	0.41
10341928	NA	0.464	0.916	4.2	4.6	0.41
10394682	NA	0.0215	0.641	7.9	8.3	0.41
10339921	NA	0.136	0.835	5.8	6.2	0.41
10462853	Cyp26a1	0.414	0.906	8.7	9.1	0.41
10341918	NA	0.222	0.856	5.6	6	0.41
10344413	NA	0.224	0.856	3.5	3.9	0.41
10339474	NA	0.39	0.902	5	5.4	0.41
10403031	NA	0.00913	0.522	4.9	5.3	0.41
10342708	NA	0.0108	0.554	5.9	6.4	0.41
10428604	Tnfrsf11b	0.0356	0.685	7.5	7.9	0.41
10343439	NA	0.0603	0.759	8.8	9.2	0.41
10364593	Cnn2	0.0911	0.805	8.1	8.5	0.41
10343847	NA	0.171	0.847	3.9	4.3	0.41
10344395	NA	0.194	0.851	3	3.4	0.41
10339250	NA	0.209	0.853	4.1	4.5	0.41
10394862	Asap2	0.344	0.891	7.9	8.3	0.41
10479938	Echdc3	0.0156	0.611	9.7	10.1	0.41
10395805	NA	0.0572	0.754	9.4	9.8	0.41
10342019	NA	0.104	0.816	4.6	5	0.41
10343333	NA	0.292	0.877	5.2	5.6	0.41
10344443	NA	0.433	0.909	4.3	4.7	0.41
10340762	NA	0.487	0.92	3.3	3.7	0.41
10407211	NA	0.152	0.84	8.5	8.9	0.41
10340792	NA	0.275	0.873	4.2	4.6	0.41
10344206	NA	0.0287	0.666	6.3	6.7	0.41
10549714	NA	0.0377	0.689	12.6	13	0.41
10338351	NA	0.0527	0.742	5	5.4	0.41
10594661	Tpm1	0.124	0.829	7.9	8.3	0.41
10340052	NA	0.42	0.906	2.9	3.3	0.41
10538123	Gimap9	0.0192	0.633	7.1	7.5	0.41
10339152	NA	0.0588	0.756	2.9	3.3	0.41
10523021	Slc4a4	0.117	0.823	10.2	10.6	0.41
10342786	NA	0.268	0.871	2.9	3.3	0.41
10341407	NA	0.0126	0.579	2	2.4	0.41
10521389	Hmx1	0.0153	0.607	4.7	5.2	0.41
10603087	Pir	0.0291	0.669	9	9.4	0.41
10339441	NA	0.0831	0.793	6.3	6.7	0.41
10338220	NA	0.0924	0.807	4.5	4.9	0.41
10340594	NA	0.0946	0.808	2.9	3.3	0.41
10339229	NA	0.211	0.854	6.1	6.5	0.41
10342149	NA	0.266	0.87	7.8	8.2	0.41
10338822	NA	0.349	0.892	5.2	5.7	0.41
10416256	Bin3	0.00206	0.332	8.6	9	0.4
10342509	NA	0.00207	0.332	2.5	2.9	0.4
10510546	NA	0.0185	0.627	12.6	13	0.4
10338742	NA	0.0213	0.641	6	6.4	0.4
10340192	NA	0.498	0.923	3.4	3.8	0.4
10451549	NA	0.0121	0.577	11.7	12.1	0.4
10580678	Ces1g	0.0203	0.641	11.9	12.3	0.4
10455578	Commd10	0.0577	0.755	7.7	8.1	0.4
10501762	Snx7	0.0639	0.767	8.8	9.2	0.4
10521927	Tbc1d19	0.0988	0.81	6.5	6.9	0.4
10501586	S1pr1	0.103	0.815	9.9	10.3	0.4
10339713	NA	0.278	0.873	3.7	4.1	0.4
10344370	NA	0.0545	0.75	5.6	6	0.4
10340163	NA	0.0797	0.789	11	11.4	0.4
10341163	NA	0.134	0.835	9.3	9.7	0.4
10343648	NA	0.179	0.851	3.5	3.9	0.4
10340288	NA	0.188	0.851	4.1	4.5	0.4
10343443	NA	0.0216	0.641	2.4	2.8	0.4
10555783	Olfr597	0.028	0.665	3.1	3.5	0.4
10430186	Apol7c	0.131	0.834	4.8	5.2	0.4
10411332	Hmgcr	0.165	0.846	11.4	11.8	0.4
10340642	NA	0.19	0.851	2.6	3	0.4
10341698	NA	0.05	0.726	4	4.4	0.4
10339292	NA	0.275	0.873	5.3	5.7	0.4
10344135	NA	0.506	0.923	3.3	3.7	0.4
10430743	Gm5218	0.0115	0.569	11.7	12.1	0.4
10434802	Lpp	0.0241	0.648	5.4	5.8	0.4
10338162	NA	0.0371	0.688	6.1	6.5	0.4
10605437	Pls3	0.0473	0.721	10.1	10.5	0.4
10343765	NA	0.18	0.851	2	2.4	0.4
10339522	NA	0.239	0.86	5.8	6.2	0.4
10340079	NA	0.286	0.874	4.3	4.7	0.4
10339481	NA	0.334	0.887	4.2	4.6	0.4
10560608	Apoc2	0.00165	0.294	12.2	12.6	0.4
10458098	Fam13b	0.0308	0.672	7.7	8.1	0.4
10341752	NA	0.0822	0.793	10.2	10.6	0.4
10340152	NA	0.175	0.848	7.2	7.6	0.4
10344061	NA	0.262	0.869	7.4	7.8	0.4
10341565	NA	0.426	0.907	4.7	5.1	0.4
10344439	NA	0.464	0.916	4.9	5.3	0.4
10463670	Sfxn2	0.0285	0.665	9.6	10	0.4
10342662	NA	0.0398	0.696	5.3	5.7	0.4
10341049	NA	0.299	0.879	2.6	3	0.4
10535698	Cyp3a44	0.461	0.915	8.4	8.8	0.4
10393431	Tk1	0.272	0.872	8.1	8.5	0.4
10394558	Rdh14	0.0161	0.618	11.6	12	0.4
10460251	NA	0.0234	0.647	5	5.4	0.4
10351430	Rxrg	0.0416	0.699	8.1	8.5	0.4
10509596	Rnf186	0.135	0.835	6.9	7.3	0.4
10340733	NA	0.00597	0.439	6	6.4	0.4
10341643	NA	0.0388	0.693	5.9	6.3	0.4
10339179	NA	0.17	0.847	6.2	6.6	0.4
10411147	Bhmt2	0.000399	0.169	12.1	12.5	0.39
10490824	Stmn2	0.0164	0.62	11.7	12.1	0.39
10564565	NA	0.0309	0.672	8	8.4	0.39
10501190	NA	0.0374	0.689	7.5	7.9	0.39
10428912	Fam84b	0.0647	0.77	6.2	6.6	0.39
10501222	Gstm2	0.0926	0.807	10.5	10.9	0.39
10343914	NA	0.123	0.828	5.3	5.7	0.39
10339430	NA	0.184	0.851	6.6	7	0.39
10571205	NA	0.00639	0.455	11.9	12.3	0.39
10533401	Cux2	0.0335	0.682	5.5	5.9	0.39
10344083	NA	0.0566	0.754	10.7	11.1	0.39
10339291	NA	0.106	0.818	6.3	6.7	0.39
10338171	NA	0.156	0.84	2.7	3.1	0.39
10571653	NA	0.239	0.86	11.8	12.2	0.39
10348410	Spp2	0.0392	0.693	9.1	9.5	0.39
10341822	NA	0.0794	0.789	3.8	4.2	0.39
10338778	NA	0.21	0.854	2.7	3.1	0.39
10338489	NA	0.3	0.879	5.2	5.6	0.39
10344613	NA	0.488	0.92	5.1	5.5	0.39
10601844	Bhlhb9	0.00814	0.502	4.7	5.1	0.39
10342318	NA	0.0165	0.62	6.6	7	0.39
10419966	Zfhx2	0.0747	0.783	8.4	8.8	0.39
10423155	Mtmr12	0.0839	0.793	7.8	8.2	0.39
10340084	NA	0.0984	0.81	6.5	6.9	0.39
10340185	NA	0.104	0.816	6.5	6.9	0.39
10344393	NA	0.196	0.851	4.2	4.6	0.39
10341268	NA	0.243	0.862	3.8	4.2	0.39
10459288	Adrb2	0.0207	0.641	6.6	7	0.39
10341348	NA	0.067	0.77	5.3	5.7	0.39
10339359	NA	0.38	0.898	2	2.4	0.39
10338257	NA	0.496	0.922	5.9	6.3	0.39
10466938	NA	0.00071	0.208	6.1	6.5	0.39
10417728	NA	0.00893	0.52	10.7	11.1	0.39
10344231	NA	0.00961	0.535	6.5	6.9	0.39
10341460	NA	0.00975	0.536	5.4	5.8	0.39
10448034	Dll1	0.0186	0.629	6.9	7.3	0.39
10340945	NA	0.0326	0.677	4.5	4.9	0.39
10379708	NA	0.0804	0.79	3.8	4.2	0.39
10579296	2810428I15Rik	0.104	0.816	8.8	9.2	0.39
10344376	NA	0.161	0.842	3.6	4	0.39
10340068	NA	0.237	0.86	4.9	5.3	0.39
10341938	NA	0.269	0.872	5.3	5.7	0.39
10339429	NA	0.305	0.88	4.7	5.1	0.39
10338204	NA	0.395	0.903	4.7	5.1	0.39
10400006	Ahr	0.0233	0.647	10.1	10.4	0.39
10341139	NA	0.0267	0.657	3.5	3.8	0.39
10338930	NA	0.057	0.754	4.9	5.3	0.39
10467385	Cyp2c68	0.0689	0.77	11.4	11.8	0.39
10338850	NA	0.261	0.868	4	4.4	0.39
10344080	NA	0.363	0.895	3.6	4	0.39
10342401	NA	0.464	0.916	7.8	8.2	0.39
10372503	Lgr5	0.0139	0.59	7.8	8.2	0.39
10457927	NA	0.0723	0.778	7.4	7.8	0.39
10521984	G6pd2	0.124	0.83	7.2	7.6	0.39
10339552	NA	0.127	0.83	3.3	3.6	0.39
10344567	NA	0.23	0.857	5	5.4	0.39
10600597	Tmem47	0.235	0.86	8.9	9.3	0.39
10356601	NA	0.34	0.891	7.9	8.3	0.39
10340256	NA	0.0232	0.647	11.7	12.1	0.39
10539802	Bmp10	0.0324	0.677	6.7	7.1	0.39
10408008	NA	0.035	0.685	5.8	6.2	0.39
10454105	Dsg1c	0.0872	0.799	5.9	6.3	0.39
10464285	NA	0.108	0.82	5.7	6.1	0.39
10344516	NA	0.136	0.835	6.1	6.5	0.39
10341606	NA	0.243	0.862	5.9	6.2	0.39
10340917	NA	0.346	0.891	6	6.4	0.39
10349401	Gpr39	0.0947	0.808	7.9	8.2	0.39
10339094	NA	0.186	0.851	5.6	6	0.39
10344286	NA	0.312	0.881	4.1	4.5	0.39
10343820	NA	0.322	0.882	4.4	4.8	0.39
10341645	NA	0.447	0.912	6.8	7.2	0.39
10343816	NA	0.126	0.83	8.8	9.2	0.39
10342973	NA	0.149	0.84	7.2	7.6	0.39
10381474	Arl4d	0.273	0.872	8.5	8.9	0.39
10343387	NA	0.3	0.879	5.9	6.2	0.39
10340405	NA	0.077	0.786	3.8	4.2	0.39
10500798	NA	0.106	0.818	4.8	5.1	0.39
10533026	Prkab1	0.169	0.847	9.5	9.9	0.39
10339083	NA	0.229	0.857	3.4	3.8	0.39
10423333	Fam134b	0.0077	0.49	9.4	9.7	0.38
10340225	NA	0.351	0.892	4.2	4.6	0.38
10344420	NA	0.391	0.902	3.6	4	0.38
10393904	Notum	0.0345	0.685	8.2	8.6	0.38
10339109	NA	0.252	0.866	3.2	3.6	0.38
10538921	Igk	0.273	0.872	5.5	5.8	0.38
10578649	Tenm3	0.115	0.82	8.2	8.6	0.38
10341629	NA	0.148	0.838	4.5	4.9	0.38
10339267	NA	0.195	0.851	7.9	8.3	0.38
10338537	NA	0.513	0.924	3.8	4.2	0.38
10471599	Cutal	0.00903	0.522	8.2	8.6	0.38
10505090	NA	0.0224	0.645	12.2	12.5	0.38
10562905	Atf5	0.0663	0.77	9.8	10.2	0.38
10339393	NA	0.0965	0.81	5.4	5.8	0.38
10342008	NA	0.127	0.83	3.8	4.2	0.38
10342975	NA	0.148	0.838	3	3.4	0.38
10341796	NA	0.213	0.856	5	5.4	0.38
10433032	Atf7	0.271	0.872	7.9	8.3	0.38
10342365	NA	0.316	0.881	4.4	4.8	0.38
10341870	NA	0.324	0.883	6.7	7.1	0.38
10339777	NA	0.404	0.903	6.2	6.5	0.38
10602739	Acot9	0.00567	0.436	7	7.3	0.38
10341848	NA	0.0112	0.564	6.1	6.5	0.38
10454885	Slc4a9	0.0441	0.71	6.2	6.6	0.38
10431035	Ttll12	0.0518	0.737	8.3	8.7	0.38
10344084	NA	0.234	0.86	5.1	5.5	0.38
10341976	NA	0.261	0.869	4.6	5	0.38
10342256	NA	0.526	0.928	3.1	3.5	0.38
10605055	Haus7	0.00499	0.429	8	8.4	0.38
10454057	NA	0.00972	0.535	11.1	11.5	0.38
10367497	Olfr787	0.0688	0.77	3.3	3.7	0.38
10510129	Dhrs3	0.0693	0.77	11.6	11.9	0.38
10338219	NA	0.0971	0.81	6.6	7	0.38
10340296	NA	0.121	0.827	4.9	5.2	0.38
10342217	NA	0.192	0.851	2.7	3.1	0.38
10578352	Fgl1	0.212	0.854	11.7	12.1	0.38
10411359	Plp2	0.00226	0.347	6.6	7	0.38
10339844	NA	0.0399	0.696	2.6	3	0.38
10386070	Atox1	0.0807	0.791	10.5	10.8	0.38
10366705	NA	0.107	0.82	11.6	11.9	0.38
10441394	NA	0.11	0.82	4.1	4.5	0.38
10361509	Syne1	0.13	0.833	7.4	7.8	0.38
10340046	NA	0.184	0.851	5.8	6.2	0.38
10340189	NA	0.263	0.869	3.6	4	0.38
10339524	NA	0.29	0.876	5	5.4	0.38
10580231	NA	0.00362	0.389	7.7	8.1	0.38
10519105	Ski	0.0123	0.577	9.1	9.5	0.38
10457922	NA	0.0171	0.62	12.3	12.7	0.38
10424345	NA	0.0198	0.641	5.6	6	0.38
10570000	Gpi1	0.0496	0.726	11.8	12.2	0.38
10341754	NA	0.0683	0.77	2.3	2.7	0.38
10343817	NA	0.132	0.834	5.4	5.7	0.38
10338809	NA	0.202	0.851	2.9	3.3	0.38
10341420	NA	0.246	0.863	6.7	7.1	0.38
10361234	Hsd11b1	0.00141	0.273	12.1	12.5	0.38
10407097	Pde4d	0.0227	0.646	7.7	8.1	0.38
10571310	Gm4889	0.0208	0.641	11.4	11.8	0.38
10462473	Mbl2	0.144	0.837	10.4	10.8	0.38
10342563	NA	0.152	0.84	5.3	5.7	0.38
10344365	NA	0.499	0.923	3.1	3.4	0.38
10560816	Atp5g2	0.0498	0.726	11.8	12.1	0.38
10340518	NA	0.161	0.842	5.6	6	0.38
10375343	Rnf145	0.168	0.847	8.2	8.6	0.38
10343590	NA	0.247	0.863	6	6.4	0.38
10338290	NA	0.329	0.885	5.9	6.3	0.38
10344139	NA	0.332	0.886	3	3.4	0.38
10338413	NA	0.335	0.887	4.1	4.5	0.38
10585048	Cadm1	0.0052	0.429	8.7	9.1	0.38
10495147	Dennd2d	0.0171	0.62	7.8	8.2	0.38
10453318	Abcg5	0.0329	0.678	10.4	10.8	0.38
10416950	Mir18	0.162	0.844	4.7	5.1	0.38
10441787	Airn	0.177	0.85	6.4	6.7	0.38
10587688	9430037G07Rik	0.215	0.856	7.4	7.8	0.38
10595620	NA	0.215	0.856	7.4	7.8	0.38
10340070	NA	0.331	0.885	2.5	2.9	0.38
10344147	NA	0.347	0.891	5.6	6	0.38
10338154	NA	0.484	0.92	5.1	5.4	0.38
10588883	Amt	0.0487	0.724	10.1	10.4	0.37
10549495	NA	0.173	0.848	10	10.4	0.37
10342183	NA	0.176	0.849	3.2	3.6	0.37
10343190	NA	0.332	0.886	6.5	6.8	0.37
10341060	NA	0.491	0.92	4.8	5.2	0.37
10343813	NA	0.00444	0.415	8	8.4	0.37
10344401	NA	0.0156	0.611	2.5	2.8	0.37
10557738	Ctf1	0.0191	0.633	7.3	7.6	0.37
10522127	Klb	0.0299	0.672	10	10.4	0.37
10542477	Pik3c2g	0.0408	0.699	7.1	7.4	0.37
10448202	NA	0.0458	0.712	10.4	10.8	0.37
10419736	Dad1	0.154	0.84	12.1	12.5	0.37
10340897	NA	0.173	0.848	5.7	6	0.37
10343881	NA	0.246	0.863	6.4	6.7	0.37
10338486	NA	0.349	0.892	7.5	7.9	0.37
10598041	NA	0.755	0.971	10	10.4	0.37
10340579	NA	0.02	0.641	5.8	6.1	0.37
10407307	Mocs2	0.026	0.656	9.9	10.3	0.37
10462887	Pde6c	0.0363	0.686	5.6	6	0.37
10339551	NA	0.0656	0.77	3.2	3.6	0.37
10358379	Trove2	0.0994	0.811	6.8	7.2	0.37
10601471	NA	0.117	0.821	6.9	7.3	0.37
10338999	NA	0.12	0.826	4.8	5.1	0.37
10340910	NA	0.158	0.841	3.7	4.1	0.37
10360370	BC094916	0.19	0.851	5.2	5.5	0.37
10339612	NA	0.227	0.857	2.5	2.9	0.37
10340323	NA	0.265	0.869	2.7	3.1	0.37
10341098	NA	0.516	0.925	4	4.4	0.37
10340819	NA	0.538	0.929	3.9	4.3	0.37
10340964	NA	0.564	0.936	5.1	5.4	0.37
10344474	NA	0.025	0.65	2.1	2.5	0.37
10344344	NA	0.045	0.712	5.1	5.4	0.37
10338287	NA	0.0683	0.77	4.9	5.2	0.37
10414514	Pnp	0.094	0.808	10	10.3	0.37
10341799	NA	0.109	0.82	4.2	4.6	0.37
10401238	Zfp36l1	0.393	0.902	9.8	10.2	0.37
10339442	NA	0.553	0.932	3.2	3.5	0.37
10458430	Diap1	0.0102	0.541	8.8	9.2	0.37
10584615	Pvrl1	0.125	0.83	10.2	10.5	0.37
10345666	Pdcl3	0.00238	0.354	8.9	9.3	0.37
10340094	NA	0.0053	0.429	10.8	11.1	0.37
10489038	Scand1	0.023	0.647	10.5	10.8	0.37
10338964	NA	0.359	0.893	5	5.4	0.37
10507137	Pdzk1ip1	0.0343	0.685	8.5	8.8	0.37
10384051	Gck	0.0482	0.724	10.4	10.8	0.37
10422942	NA	0.0794	0.789	2.3	2.6	0.37
10339561	NA	0.283	0.873	6.8	7.2	0.37
10605007	NA	0.408	0.904	6	6.3	0.37
10342713	NA	0.478	0.918	4.7	5.1	0.37
10340126	NA	0.538	0.929	4.7	5.1	0.37
10347910	Fbxo36	0.00936	0.528	9.2	9.6	0.37
10366725	Fam19a2	0.0176	0.62	6.2	6.6	0.37
10520612	Khk	0.0328	0.677	11.8	12.2	0.37
10553403	Htatip2	0.00331	0.385	7.6	8	0.37
10393926	Dcxr	0.0036	0.388	10.7	11.1	0.37
10557459	Mapk3	0.0402	0.696	10.1	10.4	0.37
10338232	NA	0.255	0.866	5.2	5.5	0.37
10341858	NA	0.266	0.87	2.4	2.8	0.37
10344075	NA	0.414	0.906	4.4	4.8	0.37
10338523	NA	0.448	0.912	5.5	5.9	0.37
10338693	NA	0.549	0.932	3.3	3.7	0.37
10592938	Ttc36	0.00118	0.261	12.7	13	0.37
10533023	NA	0.0262	0.657	12.1	12.5	0.37
10377652	Gps2	0.0413	0.699	8.7	9.1	0.37
10341771	NA	0.503	0.923	4.1	4.4	0.37
10441642	Mpc1	0.0203	0.641	9	9.4	0.37
10344099	NA	0.102	0.815	4.9	5.2	0.37
10338273	NA	0.174	0.848	7.6	8	0.37
10547924	NA	0.0248	0.65	12.3	12.6	0.37
10340541	NA	0.0558	0.754	5.6	6	0.37
10338208	NA	0.241	0.862	5.2	5.5	0.37
10343060	NA	0.493	0.921	4.6	4.9	0.37
10342069	NA	0.0048	0.429	4.9	5.3	0.36
10340721	NA	0.0181	0.623	9.2	9.6	0.36
10386370	Arf1	0.047	0.72	12.1	12.5	0.36
10392413	NA	0.08	0.79	3.6	4	0.36
10382300	Map2k6	0.0864	0.798	7.4	7.7	0.36
10518570	Pgd	0.106	0.818	10.2	10.6	0.36
10338820	NA	0.157	0.84	4.1	4.4	0.36
10339494	NA	0.463	0.915	3.1	3.5	0.36
10339640	NA	0.478	0.918	6.3	6.6	0.36
10340197	NA	0.555	0.933	4.6	4.9	0.36
10341217	NA	0.431	0.908	4.5	4.9	0.36
10476441	NA	0.0236	0.647	12.1	12.5	0.36
10345909	NA	0.0317	0.673	12.2	12.5	0.36
10404965	Rnf144b	0.149	0.84	10.4	10.7	0.36
10340879	NA	0.332	0.886	6.3	6.6	0.36
10603896	Klhl13	0.024	0.647	7.9	8.3	0.36
10447566	Atp5g2	0.0499	0.726	11.7	12.1	0.36
10471337	Pomt1	0.116	0.82	9.2	9.6	0.36
10453738	Fzd8	0.203	0.851	8.7	9	0.36
10340568	NA	0.526	0.928	2.6	3	0.36
10338499	NA	0.532	0.929	3.2	3.5	0.36
10567546	Crym	0.00359	0.388	7.2	7.6	0.36
10514464	NA	0.0338	0.684	11.8	12.1	0.36
10339719	NA	0.208	0.852	5.8	6.2	0.36
10344284	NA	0.279	0.873	5.4	5.7	0.36
10344299	NA	0.283	0.873	6.5	6.9	0.36
10338135	NA	0.364	0.895	6.2	6.5	0.36
10344060	NA	0.47	0.918	5.1	5.5	0.36
10342606	NA	0.012	0.577	4.4	4.7	0.36
10460968	Rasgrp2	0.0276	0.664	7.4	7.7	0.36
10557960	Tgfb1i1	0.0623	0.76	6.8	7.2	0.36
10580955	NA	0.0951	0.808	5.7	6.1	0.36
10341219	NA	0.122	0.828	8.3	8.7	0.36
10344223	NA	0.251	0.865	5.7	6	0.36
10340516	NA	0.275	0.873	7.7	8.1	0.36
10342232	NA	0.367	0.895	5.7	6.1	0.36
10343986	NA	0.384	0.9	4.2	4.6	0.36
10348354	NA	0.002	0.328	11.6	12	0.36
10343102	NA	0.11	0.82	6.1	6.4	0.36
10344572	NA	0.218	0.856	5.7	6.1	0.36
10340634	NA	0.264	0.869	3.9	4.3	0.36
10338260	NA	0.283	0.873	2.7	3	0.36
10403743	Inhba	0.401	0.903	8.5	8.9	0.36
10340010	NA	0.0124	0.577	2.2	2.6	0.36
10507520	Hyi	0.0413	0.699	9.6	10	0.36
10338209	NA	0.329	0.885	7.7	8.1	0.36
10343009	NA	0.557	0.934	3.6	4	0.36
10602062	Prps1	8.62e-05	0.0806	9.4	9.7	0.36
10477061	Srxn1	0.00912	0.522	9	9.4	0.36
10562647	NA	0.03	0.672	12.2	12.6	0.36
10507551	2610528J11Rik	0.0527	0.742	7.2	7.6	0.36
10385175	Wwc1	0.0619	0.759	8.9	9.3	0.36
10342687	NA	0.251	0.865	4.6	4.9	0.36
10338791	NA	0.283	0.874	7	7.3	0.36
10339778	NA	0.417	0.906	3.6	3.9	0.36
10340180	NA	0.0613	0.759	6.8	7.1	0.36
10340709	NA	0.0837	0.793	6.5	6.9	0.36
10340178	NA	0.114	0.82	5.3	5.7	0.36
10537849	Arhgef5	0.135	0.835	8.2	8.6	0.36
10424555	NA	0.189	0.851	5.2	5.5	0.36
10509063	Il22ra1	0.215	0.856	8.7	9	0.36
10427075	Krt18	0.229	0.857	11.8	12.1	0.36
10339916	NA	0.353	0.892	3.1	3.4	0.36
10342774	NA	0.379	0.897	5.7	6.1	0.36
10339647	NA	0.488	0.92	4	4.4	0.36
10484205	Ccdc141	0.0038	0.389	5.3	5.7	0.36
10449575	Ppil1	0.00996	0.54	8.1	8.5	0.36
10340315	NA	0.0403	0.696	2	2.3	0.36
10342319	NA	0.264	0.869	4.6	5	0.36
10343223	NA	0.287	0.875	5.7	6.1	0.36
10339852	NA	0.297	0.878	2.9	3.3	0.36
10339554	NA	0.331	0.885	4.5	4.9	0.36
10367400	Mmp19	0.0265	0.657	10.2	10.5	0.36
10498117	NA	0.0358	0.685	12.1	12.5	0.36
10502552	Clca1	0.131	0.834	6	6.3	0.36
10340437	NA	0.165	0.847	4.5	4.8	0.36
10343397	NA	0.292	0.877	4.6	4.9	0.36
10415784	Trim13	0.374	0.897	7	7.3	0.36
10338808	NA	0.408	0.905	3.9	4.2	0.36
10550102	Lig1	0.007	0.477	6.7	7.1	0.35
10529671	Slc2a9	0.00715	0.481	9.2	9.5	0.35
10366522	NA	0.02	0.641	12.2	12.5	0.35
10393944	Rfng	0.0282	0.665	8	8.4	0.35
10350044	NA	0.0312	0.672	12.2	12.5	0.35
10485687	Mettl15	0.044	0.71	6.9	7.3	0.35
10341494	NA	0.0549	0.75	5.6	5.9	0.35
10431546	NA	0.102	0.814	10.2	10.5	0.35
10424691	Ly6f	0.118	0.823	6.2	6.5	0.35
10342759	NA	0.129	0.831	2.5	2.8	0.35
10340694	NA	0.209	0.853	5.7	6	0.35
10338620	NA	0.447	0.912	3.7	4	0.35
10340549	NA	0.506	0.923	6	6.4	0.35
10365769	Hal	0.00523	0.429	12.5	12.9	0.35
10536746	Arf5	0.00958	0.534	10	10.3	0.35
10604633	NA	0.0221	0.644	8.2	8.5	0.35
10357579	Mapkapk2	0.0269	0.658	9.9	10.2	0.35
10574595	NA	0.0875	0.799	8	8.3	0.35
10342528	NA	0.187	0.851	2.7	3	0.35
10600131	NA	0.356	0.892	4.1	4.4	0.35
10343954	NA	0.431	0.908	3.2	3.6	0.35
10340641	NA	0.477	0.918	4	4.4	0.35
10340186	NA	0.541	0.93	5	5.3	0.35
10369989	Ddt	0.00322	0.384	11.5	11.9	0.35
10431528	Lmf2	0.0704	0.775	9.5	9.8	0.35
10364712	Cirbp	0.0824	0.793	8	8.4	0.35
10552553	Klk1b7-ps	0.206	0.852	4.8	5.2	0.35
10342467	NA	0.304	0.879	6.7	7	0.35
10341548	NA	0.389	0.901	3.9	4.3	0.35
10342865	NA	0.477	0.918	5.6	6	0.35
10340622	NA	0.0173	0.62	2.3	2.6	0.35
10406865	Mrps27	0.0232	0.647	8.4	8.7	0.35
10402316	NA	0.0237	0.647	12.2	12.6	0.35
10383289	Baiap2	0.0462	0.715	8.9	9.3	0.35
10374464	Spred2	0.0631	0.764	7.3	7.7	0.35
10400321	Sptssa	0.159	0.841	7.4	7.8	0.35
10350471	NA	0.2	0.851	3.7	4.1	0.35
10341843	NA	0.215	0.856	5.8	6.1	0.35
10349832	NA	0.249	0.863	6.2	6.6	0.35
10407387	Gm7120	0.43	0.908	8.8	9.2	0.35
10602176	NA	0.0623	0.76	7.9	8.3	0.35
10434806	Lpp	0.139	0.836	10.8	11.2	0.35
10342551	NA	0.341	0.891	4.3	4.6	0.35
10344191	NA	0.409	0.905	3.5	3.8	0.35
10344204	NA	0.49	0.92	4.9	5.2	0.35
10343128	NA	0.525	0.928	5.7	6.1	0.35
10472197	NA	0.038	0.69	12.2	12.5	0.35
10473596	NA	0.0609	0.759	3.8	4.2	0.35
10447190	Plekhh2	0.111	0.82	6.2	6.5	0.35
10420785	Mtmr9	0.181	0.851	7.1	7.5	0.35
10338228	NA	0.312	0.881	8.4	8.8	0.35
10342278	NA	0.315	0.881	3.8	4.2	0.35
10414527	NA	0.0371	0.688	11.2	11.6	0.35
10341745	NA	0.104	0.816	2.9	3.2	0.35
10339693	NA	0.115	0.82	5.7	6.1	0.35
10564467	Lrrc28	0.138	0.835	9.2	9.5	0.35
10572085	Nat1	0.197	0.851	5.9	6.3	0.35
10344304	NA	0.254	0.866	5.8	6.2	0.35
10362902	NA	0.0045	0.417	10.5	10.8	0.35
10463200	Hoga1	0.0287	0.666	11.3	11.7	0.35
10405576	Fbxl21	0.0348	0.685	6.3	6.6	0.35
10532954	Mlec	0.114	0.82	8.8	9.1	0.35
10341415	NA	0.227	0.857	3.5	3.8	0.35
10339733	NA	0.506	0.923	5.8	6.2	0.35
10511375	Cyp7a1	0.546	0.931	11.6	12	0.35
10343326	NA	0.626	0.95	2.8	3.2	0.35
10339828	NA	0.631	0.951	3.6	3.9	0.35
10445323	NA	0.0285	0.665	3.5	3.9	0.35
10427035	Nr4a1	0.124	0.83	6.4	6.7	0.35
10604984	NA	0.374	0.897	4.3	4.7	0.35
10339282	NA	0.391	0.902	4.9	5.3	0.35
10340301	NA	0.628	0.95	4.1	4.4	0.35
10405566	Slc25a48	0.00987	0.539	8.4	8.7	0.35
10438405	Iglv1	0.023	0.647	5.7	6	0.35
10338123	NA	0.0397	0.695	9.5	9.9	0.35
10341687	NA	0.0462	0.716	7.5	7.9	0.35
10340994	NA	0.141	0.836	5.7	6.1	0.35
10534966	Zfp113	0.148	0.838	7.4	7.8	0.35
10339262	NA	0.175	0.848	6.2	6.6	0.35
10343108	NA	0.34	0.89	4.4	4.7	0.35
10454733	NA	0.0171	0.62	12.2	12.6	0.35
10584827	Mpzl2	0.0264	0.657	10.6	10.9	0.35
10444041	Ndufa7	0.0591	0.756	9.7	10	0.35
10563441	Emp3	0.1	0.812	7.3	7.6	0.35
10339669	NA	0.102	0.815	2.2	2.6	0.35
10342519	NA	0.122	0.828	3.5	3.9	0.35
10340669	NA	0.152	0.84	4.5	4.8	0.35
10475800	Adra2b	0.182	0.851	8	8.3	0.35
10340915	NA	0.283	0.873	4.6	5	0.35
10340601	NA	0.344	0.891	5.4	5.7	0.35
10407481	Pfkp	0.00577	0.437	6.3	6.7	0.35
10583142	NA	0.0239	0.647	12.3	12.6	0.35
10500091	Scnm1	0.0314	0.673	9.4	9.7	0.35
10340903	NA	0.0638	0.766	7.4	7.7	0.35
10339129	NA	0.097	0.81	6.2	6.5	0.35
10338566	NA	0.101	0.813	6.8	7.2	0.35
10338811	NA	0.144	0.837	10.5	10.8	0.35
10428619	Enpp2	0.171	0.848	10.4	10.8	0.35
10343850	NA	0.51	0.923	3.6	3.9	0.35
10499378	Sema4a	0.0165	0.62	10.3	10.7	0.34
10527886	Gatad1	0.0822	0.793	7.8	8.1	0.34
10429387	Ptplb	0.00813	0.502	12.3	12.7	0.34
10508707	Tmem200b	0.0303	0.672	7.9	8.3	0.34
10389238	Dusp14	0.0591	0.756	7.4	7.8	0.34
10341656	NA	0.0623	0.76	3.7	4	0.34
10358357	NA	0.152	0.84	7.5	7.8	0.34
10482073	NA	0.187	0.851	9.1	9.5	0.34
10342844	NA	0.217	0.856	3.1	3.4	0.34
10340844	NA	0.366	0.895	5.2	5.6	0.34
10344465	NA	0.65	0.954	4.6	5	0.34
10456545	Ccdc68	0.000265	0.133	6.3	6.6	0.34
10554198	Klhl25	0.0113	0.564	7.8	8.1	0.34
10338104	NA	0.0144	0.595	8.1	8.4	0.34
10523111	5830473C10Rik	0.0403	0.696	10.9	11.3	0.34
10369413	Sgpl1	0.0558	0.754	9.6	9.9	0.34
10343265	NA	0.111	0.82	5.5	5.9	0.34
10343415	NA	0.401	0.903	4.7	5.1	0.34
10341721	NA	0.44	0.911	5	5.4	0.34
10524588	Ankrd13a	0.000259	0.132	9	9.3	0.34
10342294	NA	0.00911	0.522	11	11.3	0.34
10585194	Il18	0.0271	0.659	7.7	8.1	0.34
10340795	NA	0.0931	0.807	2.5	2.9	0.34
10339263	NA	0.37	0.895	2.4	2.7	0.34
10340883	NA	0.558	0.934	3.3	3.6	0.34
10343927	NA	0.00247	0.364	10.1	10.5	0.34
10444895	Flot1	0.00357	0.388	7.6	8	0.34
10343570	NA	0.0058	0.437	8.3	8.7	0.34
10581569	NA	0.0175	0.62	11.7	12	0.34
10466606	Anxa1	0.0451	0.712	6.2	6.6	0.34
10340916	NA	0.0574	0.754	6.9	7.2	0.34
10495035	Slc16a1	0.0735	0.781	9.7	10	0.34
10382516	Kctd2	0.0945	0.808	8.1	8.5	0.34
10353667	NA	0.105	0.816	2.9	3.2	0.34
10341563	NA	0.106	0.818	3.6	4	0.34
10344449	NA	0.149	0.839	6.8	7.2	0.34
10342651	NA	0.224	0.856	5.3	5.7	0.34
10341326	NA	0.42	0.907	4.3	4.7	0.34
10341228	NA	0.447	0.912	3.9	4.3	0.34
10443808	Ndufv3	0.0408	0.699	9.3	9.7	0.34
10341556	NA	0.107	0.82	2.3	2.6	0.34
10341363	NA	0.153	0.84	5.1	5.4	0.34
10343655	NA	0.209	0.853	6.3	6.6	0.34
10338134	NA	0.212	0.855	11.5	11.8	0.34
10344537	NA	0.226	0.857	5.4	5.8	0.34
10344546	NA	0.313	0.881	4.6	5	0.34
10338388	NA	0.365	0.895	4.5	4.9	0.34
10588499	NA	0.031	0.672	12.2	12.6	0.34
10523579	Arhgap24	0.0497	0.726	7.3	7.7	0.34
10343275	NA	0.0634	0.765	2.8	3.2	0.34
10340373	NA	0.107	0.82	3.9	4.2	0.34
10341994	NA	0.248	0.863	3.4	3.7	0.34
10343206	NA	0.307	0.881	2.9	3.3	0.34
10339555	NA	0.314	0.881	4.8	5.2	0.34
10344118	NA	0.368	0.895	6	6.3	0.34
10548785	NA	0.369	0.895	9.2	9.5	0.34
10456291	Mir122a	0.679	0.96	5.5	5.8	0.34
10455595	NA	0.0101	0.54	12.7	13	0.34
10344326	NA	0.492	0.921	5.6	6	0.34
10340480	NA	0.563	0.935	4.5	4.8	0.34
10339457	NA	0.621	0.949	3	3.3	0.34
10504194	NA	0.0237	0.647	9.4	9.8	0.34
10504164	NA	0.0237	0.647	9.4	9.8	0.34
10544855	NA	0.0265	0.657	12.2	12.5	0.34
10404496	Nqo2	0.0383	0.691	10.9	11.3	0.34
10562211	Fxyd1	0.0467	0.718	11.6	12	0.34
10533360	Acad12	0.072	0.778	6.5	6.9	0.34
10344467	NA	0.112	0.82	5.1	5.4	0.34
10338353	NA	0.224	0.856	5.9	6.2	0.34
10343173	NA	0.225	0.857	2.2	2.5	0.34
10341482	NA	0.326	0.884	2.7	3	0.34
10343074	NA	0.46	0.915	3.6	3.9	0.34
10458661	NA	0.0584	0.756	7.6	7.9	0.34
10339820	NA	0.179	0.851	9	9.3	0.34
10341486	NA	0.18	0.851	2	2.4	0.34
10344229	NA	0.225	0.857	4.8	5.1	0.34
10341227	NA	0.0168	0.62	10.3	10.7	0.34
10578219	NA	0.0204	0.641	7	7.3	0.34
10448208	Zfp947	0.134	0.835	5	5.3	0.34
10392347	Pitpnc1	0.201	0.851	8.6	9	0.34
10339684	NA	0.354	0.892	3.2	3.5	0.34
10343455	NA	0.698	0.964	3.8	4.1	0.34
10588505	Abhd14b	0.0158	0.613	11.1	11.4	0.34
10344407	NA	0.0431	0.707	3.3	3.7	0.34
10363118	Dcbld1	0.0613	0.759	7.2	7.6	0.34
10507848	NA	0.168	0.847	5.9	6.3	0.34
10582811	Irf2bp2	0.236	0.86	9.9	10.3	0.34
10341810	NA	0.348	0.892	3.9	4.3	0.34
10447617	Mir692-1	0.0228	0.647	10.4	10.7	0.33
10397555	Gm8587	0.0584	0.756	8	8.3	0.33
10407876	Sugct	0.127	0.83	8.5	8.8	0.33
10342072	NA	0.195	0.851	4.6	4.9	0.33
10501235	Gstm4	0.241	0.862	11.4	11.7	0.33
10338781	NA	0.297	0.878	2.1	2.4	0.33
10340270	NA	0.385	0.901	4.4	4.7	0.33
10342170	NA	0.394	0.903	9.9	10.2	0.33
10340341	NA	0.0178	0.62	3.7	4	0.33
10403346	NA	0.0378	0.69	12.2	12.5	0.33
10339509	NA	0.157	0.84	5.6	5.9	0.33
10342347	NA	0.181	0.851	6.2	6.6	0.33
10339187	NA	0.197	0.851	2.9	3.2	0.33
10340778	NA	0.204	0.851	2.8	3.2	0.33
10341950	NA	0.271	0.872	5.3	5.6	0.33
10338573	NA	0.344	0.891	5.4	5.7	0.33
10338379	NA	0.414	0.906	2.4	2.8	0.33
10342285	NA	0.653	0.955	3.7	4	0.33
10604637	NA	0.0159	0.614	8.2	8.5	0.33
10592535	Sorl1	0.104	0.816	6.5	6.9	0.33
10343310	NA	0.124	0.829	2.2	2.5	0.33
10343752	NA	0.213	0.856	5.3	5.7	0.33
10341333	NA	0.273	0.872	4.2	4.5	0.33
10340628	NA	0.364	0.895	7.5	7.9	0.33
10342638	NA	0.401	0.903	2.4	2.8	0.33
10339799	NA	0.45	0.912	3.3	3.7	0.33
10339648	NA	0.595	0.943	4.9	5.3	0.33
10341067	NA	0.601	0.943	5	5.3	0.33
10603346	Plp2	0.011	0.56	6.7	7	0.33
10339708	NA	0.0184	0.626	5.3	5.7	0.33
10339804	NA	0.041	0.699	4.5	4.8	0.33
10339878	NA	0.114	0.82	7.6	8	0.33
10344121	NA	0.191	0.851	3	3.3	0.33
10341149	NA	0.202	0.851	2.6	2.9	0.33
10341428	NA	0.28	0.873	5.4	5.7	0.33
10343159	NA	0.519	0.926	4.6	4.9	0.33
10541071	8430408G22Rik	0.626	0.95	9.5	9.8	0.33
10341339	NA	0.0335	0.682	4.7	5	0.33
10433049	Atp5g2	0.0608	0.759	11.7	12	0.33
10363786	Ank3	0.117	0.823	7.9	8.2	0.33
10344535	NA	0.156	0.84	3.2	3.5	0.33
10339464	NA	0.214	0.856	4.7	5.1	0.33
10338217	NA	0.221	0.856	9	9.3	0.33
10343952	NA	0.241	0.862	5.2	5.5	0.33
10342004	NA	0.356	0.892	6.1	6.4	0.33
10339301	NA	0.472	0.918	7.2	7.6	0.33
10494595	Notch2	0.0151	0.605	9.5	9.8	0.33
10356172	Pid1	0.0833	0.793	10	10.3	0.33
10344211	NA	0.0953	0.808	2.9	3.3	0.33
10545210	Igkv4-55	0.105	0.818	5.3	5.7	0.33
10355967	Ap1s3	0.112	0.82	6.4	6.7	0.33
10447594	NA	0.334	0.886	9.3	9.6	0.33
10360578	NA	0.0284	0.665	12.3	12.6	0.33
10463704	As3mt	0.0751	0.783	10.3	10.6	0.33
10340497	NA	0.0805	0.79	9.9	10.2	0.33
10459225	Mir145a	0.0904	0.803	5	5.3	0.33
10342192	NA	0.163	0.844	5.8	6.1	0.33
10339833	NA	0.215	0.856	2.4	2.7	0.33
10339930	NA	0.424	0.907	6.7	7	0.33
10338957	NA	0.451	0.912	6.1	6.4	0.33
10529206	Fndc4	0.00364	0.389	9.2	9.5	0.33
10394082	Ogfod3	0.00913	0.522	7.3	7.7	0.33
10562774	Emc10	0.0328	0.677	9.8	10.2	0.33
10339586	NA	0.075	0.783	6.9	7.3	0.33
10598771	Maoa	0.0871	0.799	7.1	7.4	0.33
10447275	Camkmt	0.0881	0.799	6	6.3	0.33
10340451	NA	0.103	0.816	5.2	5.5	0.33
10341298	NA	0.131	0.834	4.5	4.9	0.33
10341667	NA	0.296	0.877	3.8	4.2	0.33
10340542	NA	0.316	0.881	4.3	4.6	0.33
10338375	NA	0.369	0.895	3.9	4.3	0.33
10341882	NA	0.405	0.903	3	3.3	0.33
10343770	NA	0.0399	0.696	10.3	10.6	0.33
10461526	Vwce	0.0642	0.767	9	9.3	0.33
10338087	NA	0.1	0.812	4	4.4	0.33
10600533	NA	0.165	0.847	5	5.3	0.33
10551282	Cyp2a5	0.19	0.851	12	12.3	0.33
10338859	NA	0.194	0.851	7.1	7.4	0.33
10340957	NA	0.236	0.86	10.9	11.2	0.33
10510025	Agmat	0.0114	0.568	11.6	11.9	0.33
10499643	Chrnb2	0.0234	0.647	6.8	7.2	0.33
10391036	Krt19	0.0295	0.672	6.7	7	0.33
10500685	Atp1a1	0.0433	0.708	11.7	12	0.33
10363696	D630028G08Rik	0.0487	0.724	4.2	4.5	0.33
10515841	Gm12866	0.102	0.814	5.8	6.1	0.33
10438555	Thpo	0.214	0.856	8.4	8.8	0.33
10338542	NA	0.226	0.857	5.5	5.8	0.33
10352548	Slc30a10	0.272	0.872	9.5	9.9	0.33
10338080	NA	0.477	0.918	3.2	3.5	0.33
10435383	Ptplb	0.0014	0.273	9.9	10.2	0.33
[truncated: 33,558 more rows]

## Sheet: Changed genes at FRD≤0.1
Up- and down-regulated transcripts in the liver of Trpm6 null mice with FRD q≤0.1
Fold change (log2)	p-value (limma)	p-value (FDR)	Affymetrix ID	Symbol	Entrez Gene Name	Location	Type(s)
8.71333	2.32e-09	8.27e-05	10551218	Cyp2b9	cytochrome P450, family 2, subfamily b, polypeptide 9	Cytoplasm	enzyme
5.72583	8.07e-05	0.0795425	10359593	Fmo3	flavin containing monooxygenase 3	Cytoplasm	enzyme
4.74583	2.8e-08	0.000498046	10465726	Slc22a26	solute carrier family 22 (organic cation transporter), member 26	Other	other
3.12667	2.91e-05	0.0622704	10511779	Atp6v0d2	ATPase, H+ transporting, lysosomal 38kDa, V0 subunit d2	Cytoplasm	transporter
3.01417	2.09e-06	0.0123973	10465734	Slc22a27	solute carrier family 22, member 25	Other	other
2.71583	9.88e-05	0.0878613	10431697	Abcd2	ATP-binding cassette, sub-family D (ALD), member 2	Cytoplasm	transporter
2.10833	4.85e-05	0.0697269	10562166	Hamp2	hepcidin	Extracellular Space	other
1.865	4.14e-05	0.0697269	10369993	Gstt3	glutathione S-transferase, theta 3	Other	enzyme
1.70833	0.000109263	0.0902873	10462281	Vldlr	very low density lipoprotein receptor	Plasma Membrane	transporter
1.67333	7.8e-05	0.0795425	10423030	Prlr	prolactin receptor	Plasma Membrane	transmembrane receptor
1.59583	1.01e-05	0.0400325	10359861	Mgst3	microsomal glutathione S-transferase 3	Cytoplasm	enzyme
1.54333	2.98e-07	0.00352804	10367059	RDH16	retinol dehydrogenase 16 (all-trans)	Cytoplasm	enzyme
1.45667	0.000108286	0.0902873	10445308	Cyp39a1	cytochrome P450, family 39, subfamily A, polypeptide 1	Cytoplasm	enzyme
1.38083	1.44e-05	0.0427656	10372988	Slc16a7	solute carrier family 16 (monocarboxylate transporter), member 7	Plasma Membrane	transporter
1.155	7.11e-05	0.0788014	10535331	Mmd2	monocyte to macrophage differentiation-associated 2	Other	other
1.09417	0.000116439	0.0920022	10342998	NA	NA	NA	NA
1.06667	6.27e-05	0.0742641	10367045	Rdh16	retinol dehydrogenase 16 (all-trans)	Cytoplasm	enzyme
0.873333	5.95e-05	0.0734569	10343506	NA	NA	NA	NA
0.7375	3.03e-06	0.0153853	10404113	Slc17a1	solute carrier family 17 (organic anion transporter), member 1	Plasma Membrane	transporter
0.705833	3.29e-05	0.0650824	10568001	Sult1a1	sulfotransferase family 1A, phenol-preferring, member 1	Cytoplasm	enzyme
0.6575	2.91e-05	0.0622704	10428012	Ropn1l	rhophilin associated tail protein 1-like	Cytoplasm	kinase
0.648333	5.6e-05	0.0734569	10368289	Enpp1	ectonucleotide pyrophosphatase/phosphodiesterase 1	Plasma Membrane	enzyme
0.588333	8.25e-05	0.0795425	10340001	NA	NA	NA	NA
0.504167	0.000109664	0.0902873	10398069	Serpina3m	serpin peptidase inhibitor, clade A (alpha-1 antiproteinase, antitrypsin), member 3	Extracellular Space	other
0.451667	0.000111729	0.0902873	10533367	Acad10	acyl-CoA dehydrogenase family, member 10	Cytoplasm	enzyme
0.425833	4.87e-05	0.0697269	10582658	Agt	angiotensinogen (serpin peptidase inhibitor, clade A, member 8)	Extracellular Space	growth factor
0.3575	8.62e-05	0.0806248	10602062	Prps1	phosphoribosyl pyrophosphate synthetase 1	Cytoplasm	kinase
-0.503333	5.99e-05	0.0734569	10468949	Dclre1c	DNA cross-link repair 1C	Nucleus	enzyme
-0.589167	7.31e-05	0.0788014	10339188	NA	NA	NA	NA
-0.7525	9.15e-05	0.0834392	10372421	Trhde	thyrotropin-releasing hormone degrading enzyme	Plasma Membrane	peptidase
-0.82	0.000123547	0.0954964	10404132	Cmah	cytidine monophospho-N-acetylneuraminic acid hydroxylase	Cytoplasm	enzyme
-0.88	4.88e-05	0.0697269	10567394	Pdilt	protein disulfide isomerase-like, testis expressed	Extracellular Space	enzyme
-1.225	4.77e-05	0.0697269	10479811	Mcm10	minichromosome maintenance complex component 10	Nucleus	other
-1.24583	1.14e-05	0.0404462	10411229	F2r	coagulation factor II (thrombin) receptor	Plasma Membrane	G-protein coupled receptor
-1.24667	1.37e-06	0.00977486	10343673	NA	NA	NA	NA
-1.29417	1.44e-05	0.0427656	10464586	NA	NA	NA	NA
-1.29417	1.92e-05	0.0487244	10361152	NA	NA	NA	NA
-1.36583	4.9e-05	0.0697269	10502214	Cyp2u1	cytochrome P450, family 2, subfamily U, polypeptide 1	Cytoplasm	enzyme
-1.40083	8.28e-05	0.0795425	10410452	Srd5a1	SRD5A1	Cytoplasm	enzyme
-1.475	1.73e-05	0.0474169	10374366	Egfr	epidermal growth factor receptor	Plasma Membrane	kinase
-1.73333	7.03e-06	0.0312496	10574617	Ces4a	carboxylesterase 4A	Extracellular Space	enzyme
-1.815	4.04e-07	0.00359131	10494085	Selenbp2	selenium binding protein 1	Cytoplasm	other
-2.54917	7.19e-05	0.0788014	10422635	C6	complement component 6	Extracellular Space	other
-3.235	3.53e-05	0.0660336	10497381	Cyp7b1	cytochrome P450, family 7, subfamily B, polypeptide 1	Cytoplasm	enzyme
-5.10667	2.98e-05	0.0622704	10398011	Serpina4-ps1	serine (or cysteine) peptidase inhibitor, clade A, member 4, pseudogene 1	NA	NA
-6.00583	5.46e-05	0.0734569	10500545	Hsd3b5	hydroxy-delta-5-steroid dehydrogenase, 3 beta- and steroid delta-isomerase 4	Cytoplasm	enzyme
