# Supplementary material for: Epithelial magnesium transport by TRPM6 is essential for prenatal development and adult survival
Source: eLife. 2016 Dec 19;5:e20914. doi: 10.7554/eLife.20914 (PMC5218537; doi:10.7554/eLife.20914)
Supplement: Supplementary file 3. — Dataset is available in the Dryad Digital Repository (Chubanov and Gudermann, 2016). (1) Statistical analysis of metabolite measurements in serum samples. (2) Statistical analysis of metabolite measurements in gastrocnemius muscle samples. (3) Statistical analysis of metabolite measurements in liver samples. (4) Metabolites significantly changed in serum samples of Trpm6-deficient mice (FDR p≤0.05). (5) Metabolites significantly changed in gastrocnemius muscle samples of Trpm6-deficient mice (FDR p≤0.05). (6) Metabolites significantly changed in liver samples of Trpm6-deficient mice (FDR p≤0.05). (7) Abbreviations of metabolites. DOI: http://dx.doi.org/10.7554/eLife.20914.024 [file elife-20914-supp3.xlsx]

## Sheet: All metabolites in serum
Statistical analysis of metabolite measurements in serum samples
Metabolite	Chemical class	p-value t-test	FDR p-value t-test	log2 Fold change	Lower adj. 95%CI log2 FC	Uppper adj. 95%CI log2 FC	Median concentration in KO samples (nmol/g tissue)	Median concentration in control samples (nmol/g tissue)
Ala	Amino acids	0.3595	0.4969	0.1386	-0.2749	0.552	445.5	403.5
Arg	Amino acids	0.2342	0.4054	0.153	-0.2098	0.5158	160	145.5
Asn	Amino acids	0.1915	0.3496	0.1856	-0.1966	0.5678	42.5	39.5
Asp	Amino acids	0.9623	0.9685	0.02858	-1.716	1.773	26.5	26
Cit	Amino acids	0.2446	0.4084	0.2756	-0.3974	0.9486	51	38
Gln	Amino acids	0.109	0.2445	0.1613	-0.1051	0.4276	915	844
Glu	Amino acids	0.2351	0.4054	0.7089	-0.8909	2.309	112	55
Gly	Amino acids	0.5745	0.6885	-0.09782	-0.5889	0.3933	344.5	344.5
His	Amino acids	0.6087	0.724	-0.05522	-0.3585	0.248	83.5	85.5
Ile	Amino acids	0.3116	0.466	-0.1286	-0.4765	0.2193	127.5	136
Leu	Amino acids	0.9115	0.9336	-0.01493	-0.3906	0.3608	220	215.5
Lys	Amino acids	0.4533	0.5981	0.1128	-0.3179	0.5435	415.5	359.5
Met	Amino acids	0.9862	0.9862	-0.002718	-0.4525	0.4471	56	56.5
Orn	Amino acids	0.01333	0.05814	0.4247	0.00196	0.8474	114	82
Phe	Amino acids	0.7179	0.8167	0.04002	-0.2752	0.3553	113	111
Pro	Amino acids	0.2624	0.4138	0.2388	-0.3567	0.8342	127	103.5
Ser	Amino acids	0.3004	0.459	0.1357	-0.2209	0.4922	128	120
Thr	Amino acids	0.2471	0.4084	0.1895	-0.2721	0.651	117	96.5
Trp	Amino acids	0.001271	0.01331	0.419	0.1259	0.7122	91.5	71.5
Tyr	Amino acids	0.8674	0.915	-0.02511	-0.455	0.4048	93	91
Val	Amino acids	0.3267	0.4793	-0.1019	-0.3786	0.1748	222	231.5
ADMA	Biogenic amines	0.1184	0.2512	0.3266	-0.2556	0.9087	0.97	0.75
alpha-AAA	Biogenic amines	0.0007196	0.009385	0.3575	0.1596	0.5553	5.7	4.45
Carnosine	Biogenic amines	0.1854	0.349	-0.4102	-1.21	0.3892	0.525	0.76
DOPA	Biogenic amines	0.1299	0.267	0.6792	-0.5692	1.928	0.0525	0.0265
Histamine	Biogenic amines	0.05392	0.1568	0.7141	-0.2573	1.685	0.23	0.18
Kynurenine	Biogenic amines	0.002221	0.01744	0.5879	0.1439	1.032	1.75	1.3
Met-SO	Biogenic amines	0.6703	0.7854	0.1724	-0.9998	1.345	1.9	1.65
OH-Pro	Biogenic amines	0.4005	0.5468	0.3041	-0.6563	1.265	0.074	0.054
Sarcosine	Biogenic amines	0.07737	0.1898	-0.4198	-1.03	0.1907	3.5	4.7
SDMA	Biogenic amines	0.8264	0.8986	-0.1209	-1.715	1.473	0.215	0.255
Serotonin	Biogenic amines	0.2815	0.4376	0.3978	-0.6192	1.415	20	17.5
Spermidine	Biogenic amines	0.0007771	0.009385	0.5493	0.2093	0.8893	4.45	2.95
Spermine	Biogenic amines	0.1908	0.3496	0.8664	-0.9737	2.706	0.57	0.19
Taurine	Biogenic amines	0.6769	0.7872	0.06948	-0.4028	0.5418	512	485.5
C0	Acylcarnitines	0.06976	0.1778	-0.3697	-0.9148	0.1754	21	25
C2	Acylcarnitines	0.7255	0.8194	0.06751	-0.4797	0.6147	27	25
C3	Acylcarnitines	0.9259	0.9379	0.0222	-0.6539	0.6983	0.635	0.61
C3-DC (C4-OH)	Acylcarnitines	0.4807	0.6076	0.2155	-0.6558	1.087	0.345	0.355
C4	Acylcarnitines	0.01404	0.05958	-0.3954	-0.8051	0.01433	1.4	1.65
C5	Acylcarnitines	0.6607	0.7799	0.07984	-0.4309	0.5905	0.16	0.16
C5-DC (C6-OH)	Acylcarnitines	0.2529	0.4094	0.1841	-0.2527	0.6209	0.025	0.0205
C5-OH (C3-DC-M)	Acylcarnitines	0.2376	0.4054	0.1328	-0.1673	0.4328	0.0975	0.084
C6 (C4:1-DC)	Acylcarnitines	0.1805	0.3456	-0.3161	-0.9783	0.3462	0.15	0.18
C14	Acylcarnitines	0.07217	0.1799	0.4114	-0.1925	1.015	0.0805	0.055
C14:1	Acylcarnitines	0.06186	0.1674	0.4113	-0.1792	1.002	0.092	0.074
C16	Acylcarnitines	0.05802	0.1603	0.5448	-0.2163	1.306	0.305	0.185
C16-OH	Acylcarnitines	0.1498	0.2941	0.2133	-0.1751	0.6016	0.014	0.013
C16:2	Acylcarnitines	0.01257	0.05639	0.6788	-0.006824	1.364	0.021	0.0135
C18	Acylcarnitines	0.0006083	0.009385	0.4208	0.1652	0.6764	0.0755	0.057
C18:1	Acylcarnitines	0.009381	0.04751	0.9336	0.03342	1.834	0.285	0.135
C18:2	Acylcarnitines	0.02104	0.0826	0.8601	-0.1165	1.837	0.1035	0.0575
lysoPC a C16:0	Lysophosphatidylcholines	0.02627	0.09593	-0.336	-0.7235	0.05155	188	235.5
lysoPC a C16:1	Lysophosphatidylcholines	0.004251	0.0273	-0.8844	-1.636	-0.1324	3.85	7.8
lysoPC a C17:0	Lysophosphatidylcholines	0.8492	0.907	0.01872	-0.2498	0.2872	3.05	3
lysoPC a C18:0	Lysophosphatidylcholines	0.2569	0.4115	-0.2211	-0.7667	0.3246	73	81.5
lysoPC a C18:1	Lysophosphatidylcholines	0.004347	0.0273	-0.69	-1.278	-0.1022	30	56.5
lysoPC a C18:2	Lysophosphatidylcholines	0.01096	0.05214	-0.4057	-0.7974	-0.01402	86	116.5
lysoPC a C20:3	Lysophosphatidylcholines	0.0001273	0.003331	-1.283	-1.968	-0.5985	3.4	8.75
lysoPC a C20:4	Lysophosphatidylcholines	0.4576	0.5987	-0.1855	-0.8736	0.5027	31.5	36
lysoPC a C24:0	Lysophosphatidylcholines	0.9158	0.9336	0.0119	-0.312	0.3358	0.495	0.49
lysoPC a C26:0	Lysophosphatidylcholines	0.4445	0.5965	-0.2581	-1.231	0.7145	0.155	0.175
lysoPC a C26:1	Lysophosphatidylcholines	0.5088	0.6289	-0.226	-1.182	0.7298	0.089	0.115
lysoPC a C28:1	Lysophosphatidylcholines	0.907	0.9336	-0.02905	-0.7533	0.6952	0.115	0.12
PC aa C28:1	Phosphatidylcholines	0.5489	0.663	0.09093	-0.3338	0.5157	0.135	0.13
PC aa C30:0	Phosphatidylcholines	0.7343	0.8235	-0.03646	-0.347	0.2741	0.645	0.655
PC aa C32:0	Phosphatidylcholines	0.4933	0.6146	0.1131	-0.3612	0.5873	9.35	7.9
PC aa C32:1	Phosphatidylcholines	0.05796	0.1603	-0.625	-1.514	0.2643	3.3	5.3
PC aa C32:2	Phosphatidylcholines	0.1359	0.2736	-0.345	-0.9835	0.2936	0.705	0.96
PC aa C32:3	Phosphatidylcholines	0.4835	0.6076	0.1051	-0.326	0.5363	0.11	0.0955
PC aa C34:1	Phosphatidylcholines	0.005321	0.0293	-0.6406	-1.198	-0.08374	103	168
PC aa C34:2	Phosphatidylcholines	0.3011	0.459	-0.154	-0.5792	0.2713	367	413
PC aa C34:3	Phosphatidylcholines	0.005412	0.0293	-0.6908	-1.292	-0.08988	10.5	18
PC aa C34:4	Phosphatidylcholines	0.3352	0.4872	-0.248	-0.9729	0.4769	0.365	0.505
PC aa C36:0	Phosphatidylcholines	0.04437	0.1366	0.4636	-0.159	1.086	1.6	1.1
PC aa C36:1	Phosphatidylcholines	0.001533	0.01416	-0.4447	-0.7576	-0.1319	26.5	37.5
PC aa C36:2	Phosphatidylcholines	0.41	0.5549	-0.09996	-0.4355	0.2356	200.5	214
PC aa C36:3	Phosphatidylcholines	0.02838	0.1013	-0.3076	-0.6628	0.04753	65	85
PC aa C36:4	Phosphatidylcholines	0.8856	0.9269	0.02693	-0.5001	0.554	145	142
PC aa C36:5	Phosphatidylcholines	0.03844	0.1257	-0.5835	-1.327	0.1599	5.55	8.5
PC aa C36:6	Phosphatidylcholines	0.1164	0.2504	-0.3329	-0.9144	0.2486	0.26	0.36
PC aa C38:0	Phosphatidylcholines	0.1309	0.267	0.2213	-0.1878	0.6305	2.05	1.7
PC aa C38:3	Phosphatidylcholines	0.0009331	0.01046	-0.4815	-0.7848	-0.1781	18	25.5
PC aa C38:4	Phosphatidylcholines	0.0582	0.1603	0.322	-0.1213	0.7653	102.5	82
PC aa C38:5	Phosphatidylcholines	0.5448	0.663	-0.1329	-0.7371	0.4714	28.5	34
PC aa C38:6	Phosphatidylcholines	0.8476	0.907	0.02431	-0.3086	0.3572	134	128.5
PC aa C40:2	Phosphatidylcholines	0.0006612	0.009385	-0.6302	-1.038	-0.2227	0.285	0.44
PC aa C40:3	Phosphatidylcholines	2.198e-07	3.452e-05	-1.345	-1.746	-0.9446	0.29	0.745
PC aa C40:4	Phosphatidylcholines	1.764e-05	0.0006922	-0.7295	-1.027	-0.4322	1.75	2.95
PC aa C40:5	Phosphatidylcholines	0.2636	0.4138	-0.1998	-0.6958	0.2963	5.15	6.4
PC aa C40:6	Phosphatidylcholines	0.3501	0.4969	0.09838	-0.1652	0.362	33	30.5
PC aa C42:0	Phosphatidylcholines	0.6875	0.7937	0.0767	-0.4763	0.6296	0.103	0.0995
PC aa C42:1	Phosphatidylcholines	0.2468	0.4084	0.1421	-0.1952	0.4794	0.12	0.11
PC aa C42:2	Phosphatidylcholines	0.1717	0.3328	-0.2025	-0.6076	0.2027	0.18	0.21
PC aa C42:4	Phosphatidylcholines	0.07023	0.1778	-0.2303	-0.5752	0.1146	0.21	0.245
PC aa C42:5	Phosphatidylcholines	0.0006368	0.009385	-0.6994	-1.157	-0.242	0.26	0.415
PC aa C42:6	Phosphatidylcholines	6.432e-07	5.049e-05	-1.211	-1.602	-0.8196	0.39	1
PC ae C32:1	Phosphatidylcholines	0.09158	0.2178	0.1936	-0.1133	0.5005	0.475	0.42
PC ae C32:2	Phosphatidylcholines	0.8299	0.8986	-0.03216	-0.463	0.3987	0.17	0.155
PC ae C34:0	Phosphatidylcholines	0.1867	0.349	0.1995	-0.2263	0.6253	0.415	0.375
PC ae C34:1	Phosphatidylcholines	0.2528	0.4094	-0.1682	-0.5771	0.2407	2.85	3.4
PC ae C34:2	Phosphatidylcholines	0.3591	0.4969	0.1699	-0.3554	0.6951	3.85	3.15
PC ae C34:3	Phosphatidylcholines	0.3517	0.4969	0.1662	-0.336	0.6685	1.2	1.1
PC ae C36:0	Phosphatidylcholines	0.4501	0.5981	-0.09054	-0.4361	0.255	0.42	0.44
PC ae C36:1	Phosphatidylcholines	0.05336	0.1568	-0.2054	-0.4711	0.06036	2.2	2.55
PC ae C36:2	Phosphatidylcholines	0.06333	0.1685	0.2347	-0.09516	0.5647	8.85	7.2
PC ae C36:3	Phosphatidylcholines	0.514	0.6304	-0.09227	-0.4891	0.3046	2.35	2.3
PC ae C36:4	Phosphatidylcholines	0.0198	0.0797	0.3827	-0.03712	0.8025	5.45	4.15
PC ae C36:5	Phosphatidylcholines	0.01159	0.0535	0.6044	-0.01348	1.222	2.95	1.95
PC ae C38:0	Phosphatidylcholines	0.005247	0.0293	-0.4516	-0.8171	-0.0861	2.7	3.95
PC ae C38:1	Phosphatidylcholines	0.001514	0.01416	-0.5207	-0.9009	-0.1404	0.635	0.885
PC ae C38:2	Phosphatidylcholines	0.3089	0.466	-0.1721	-0.6555	0.3113	4.85	5
PC ae C38:3	Phosphatidylcholines	0.1129	0.2462	-0.1533	-0.4023	0.09577	1.25	1.4
PC ae C38:4	Phosphatidylcholines	0.08899	0.2149	0.3505	-0.2183	0.9194	5.5	4.25
PC ae C38:5	Phosphatidylcholines	0.03512	0.1173	0.3788	-0.09998	0.8577	5.4	3.75
PC ae C38:6	Phosphatidylcholines	0.01787	0.07384	0.318	-0.01579	0.6519	3.1	2.45
PC ae C40:0	Phosphatidylcholines	0.4838	0.6076	-0.09662	-0.4558	0.2626	14	15.5
PC ae C40:1	Phosphatidylcholines	0.7858	0.8627	-0.06149	-0.7142	0.5912	3.2	3.55
PC ae C40:2	Phosphatidylcholines	0.3608	0.4969	-0.09191	-0.3628	0.179	0.53	0.57
PC ae C40:3	Phosphatidylcholines	0.04388	0.1366	-0.2135	-0.4721	0.04523	0.4	0.47
PC ae C40:4	Phosphatidylcholines	0.8684	0.915	0.02474	-0.4073	0.4568	1.8	1.9
PC ae C40:5	Phosphatidylcholines	0.1398	0.2778	0.2022	-0.1785	0.5829	1.3	1.05
PC ae C40:6	Phosphatidylcholines	0.003246	0.02223	0.3751	0.07392	0.6763	3.1	2.4
PC ae C42:1	Phosphatidylcholines	0.4789	0.6076	-0.1342	-0.671	0.4026	0.41	0.47
PC ae C42:2	Phosphatidylcholines	0.2267	0.4045	-0.236	-0.777	0.3051	0.36	0.4
PC ae C42:3	Phosphatidylcholines	0.3432	0.4943	-0.2155	-0.8544	0.4234	0.895	1.02
PC ae C42:4	Phosphatidylcholines	0.7624	0.8429	-0.06135	-0.6493	0.5266	0.165	0.17
PC ae C44:3	Phosphatidylcholines	0.8942	0.9297	0.01645	-0.3248	0.3577	0.08	0.078
PC ae C44:5	Phosphatidylcholines	0.4739	0.6076	-0.09603	-0.4765	0.2845	0.195	0.21
PC ae C44:6	Phosphatidylcholines	0.0982	0.2234	0.2476	-0.1588	0.654	0.14	0.115
SM (OH) C14:1	Sphingomyelins	0.007011	0.03669	0.5887	0.039	1.138	0.95	0.62
SM (OH) C16:1	Sphingomyelins	0.000217	0.00426	0.5752	0.2357	0.9147	0.33	0.22
SM (OH) C22:1	Sphingomyelins	0.1979	0.3572	0.1958	-0.224	0.6156	3.45	2.9
SM (OH) C22:2	Sphingomyelins	0.127	0.2658	0.2522	-0.2088	0.7133	2.2	1.85
SM (OH) C24:1	Sphingomyelins	0.09346	0.219	0.2545	-0.1649	0.6739	0.315	0.27
SM C16:0	Sphingomyelins	0.04533	0.1369	0.2576	-0.07041	0.5856	18.5	16
SM C16:1	Sphingomyelins	0.7094	0.813	0.04587	-0.2988	0.3905	3.1	3
SM C18:0	Sphingomyelins	2.536e-06	0.0001327	0.9802	0.612	1.348	2.85	1.4
SM C18:1	Sphingomyelins	0.009792	0.04804	0.5442	0.003953	1.084	0.975	0.635
SM C24:0	Sphingomyelins	0.001655	0.01444	-0.6908	-1.209	-0.173	7.85	13
SM C24:1	Sphingomyelins	0.759	0.8429	-0.04828	-0.4952	0.3987	23.5	24.5
SM C26:1	Sphingomyelins	0.03197	0.1091	1.695	-0.2665	3.657	0.0605	0.0255
H1	Hexoses	0.1107	0.2448	-0.4076	-1.11	0.2951	13580	18230
CA	Bile Acids	0.03076	0.1073	2.231	-0.424	4.886	1215	319.4
DCA	Bile Acids	0.03965	0.127	-1.176	-2.55	0.1983	101.2	282.8
GCA	Bile Acids	0.002037	0.01684	3.107	0.8351	5.379	12.83	1.835
GCDCA	Bile Acids	0.2314	0.4054	-0.139	-0.463	0.185	17.19	19.71
LCA	Bile Acids	0.3213	0.4758	-1.395	-5.401	2.61	6.525	9.75
MCA(a)	Bile Acids	0.02427	0.09292	2.575	-0.3605	5.51	83.83	17.96
MCA(b)	Bile Acids	0.09732	0.2234	2.036	-1.307	5.378	2883	561.7
MCA(o)	Bile Acids	0.02501	0.09348	2.104	-0.3186	4.527	407.5	136.7
TCA	Bile Acids	0.004864	0.0293	2.86	0.3368	5.383	1072	130
TCDCA	Bile Acids	0.003257	0.02223	2.34	0.4163	4.265	54.11	9.77
TDCA	Bile Acids	0.06929	0.1778	-1.72	-4.159	0.7199	17.22	48.91
TMCA(a+b)	Bile Acids	0.0002009	0.00426	2.942	1.224	4.66	1578	171.6
TUDCA	Bile Acids	7.766e-05	0.002438	1.927	0.9209	2.934	49.83	16.03
UDCA	Bile Acids	0.002945	0.02202	2.468	0.5667	4.369	314.7	44.63

## Sheet: All metabolites in muscle
Statistical analysis of metabolite measurements in gastrocnemius muscle samples
Metabolite	Chemical class	p-value t-test	FDR p-value t-test	log2 Fold change	Lower adj. 95%CI log2 FC	Uppper adj. 95%CI log2 FC	Median concentration in KO samples (nmol/g tissue)	Median concentration in control samples (nmol/g tissue)
Ala	Amino acids	0.1935	0.3288	-0.1438	-0.4604	0.1727	2657	3018
Arg	Amino acids	0.3218	0.4825	0.2802	-0.5706	1.131	195	146.5
Asn	Amino acids	0.7915	0.8767	0.05404	-0.5644	0.6725	141.5	142
Asp	Amino acids	0.007781	0.05812	0.6243	0.0192	1.229	320.5	192.5
Cit	Amino acids	0.2138	0.353	-0.4034	-1.385	0.5781	73	103.5
Gln	Amino acids	0.5494	0.6677	-0.09251	-0.5662	0.3812	2246	2472
Glu	Amino acids	0.1685	0.3136	0.3817	-0.4507	1.214	1463	1113
Gly	Amino acids	1.92e-05	0.002277	-0.8325	-1.198	-0.4671	2368	3991
His	Amino acids	0.5396	0.6627	-0.09576	-0.5733	0.3818	166	197
Ile	Amino acids	0.4574	0.5938	0.1115	-0.3412	0.5643	117.5	112.5
Leu	Amino acids	0.1612	0.3033	0.219	-0.2188	0.6568	171.5	141.5
Lys	Amino acids	0.8803	0.9225	-0.07831	-1.713	1.557	556.5	595.5
Met	Amino acids	0.3174	0.4825	-0.1612	-0.6395	0.3171	94	105
Orn	Amino acids	0.1993	0.3353	-0.4043	-1.33	0.5209	30	35
Phe	Amino acids	0.0413	0.1225	0.2776	-0.09859	0.6539	123	103.5
Pro	Amino acids	0.9313	0.9475	-0.01662	-0.6015	0.5683	499.5	478
Ser	Amino acids	0.008252	0.05812	-0.5576	-1.109	-0.006139	291	442.5
Thr	Amino acids	0.4174	0.5575	-0.1461	-0.6711	0.379	242.5	286.5
Trp	Amino acids	0.1524	0.2994	0.3663	-0.3952	1.128	27.5	22
Tyr	Amino acids	0.1612	0.3033	0.1853	-0.2065	0.5771	131.5	118
Val	Amino acids	0.9373	0.9481	-0.01093	-0.4255	0.4036	229.5	232.5
ADMA	Biogenic amines	0.3895	0.5383	0.2748	-0.6957	1.245	1.7	1.6
alpha-AAA	Biogenic amines	0.7676	0.8611	0.1124	-1.012	1.236	8.35	6.35
Carnosine	Biogenic amines	0.03925	0.1225	-0.3332	-0.778	0.1117	1232	1454
Creatinine	Biogenic amines	0.2722	0.4203	0.08245	-0.1343	0.2992	327	303.5
Histamine	Biogenic amines	0.05886	0.1585	0.3779	-0.1974	0.9531	28.5	21.5
Met-SO	Biogenic amines	0.8803	0.9225	-0.04689	-1.015	0.9212	2.35	2.35
OH-Pro	Biogenic amines	0.4503	0.5938	-0.5156	-2.704	1.672	0.79	1.35
Putrescine	Biogenic amines	0.1837	0.3202	-0.2405	-0.7692	0.2881	2	2.5
Sarcosine	Biogenic amines	0.132	0.2686	-0.5069	-1.522	0.5084	26	43
SDMA	Biogenic amines	0.6829	0.7846	0.3364	-2.136	2.809	1.02	0.39
Serotonin	Biogenic amines	0.01428	0.06616	0.566	-0.0856	1.218	0.68	0.475
Spermidine	Biogenic amines	0.8225	0.894	0.05051	-0.6396	0.7406	14.5	12.5
Spermine	Biogenic amines	0.7936	0.8767	0.05108	-0.5484	0.6506	4.3	3.8
Taurine	Biogenic amines	0.6054	0.7207	-0.02942	-0.2097	0.1509	3393	3419
C0	Acylcarnitines	0.371	0.5249	0.08399	-0.1963	0.3643		101.5
C2	Acylcarnitines	0.1863	0.3202	-0.1319	-0.4252	0.1613	77	84.5
C3	Acylcarnitines	0.08832	0.2034	0.1689	-0.1096	0.4474	0.695	0.62
C3-DC (C4-OH)	Acylcarnitines	0.5204	0.6466	0.2219	-0.828	1.272	1.85	1.5
C4	Acylcarnitines	0.005191	0.04781	0.3465	0.0487	0.6443	2.95	2.15
C5	Acylcarnitines	0.02831	0.0991	0.2908	-0.04372	0.6253	0.495	0.405
C5-OH (C3-DC-M)	Acylcarnitines	0.4134	0.5565	0.116	-0.314	0.5459	0.8	0.785
C6 (C4:1-DC)	Acylcarnitines	0.3657	0.5246	0.1596	-0.3951	0.7143	0.71	0.655
C12	Acylcarnitines	0.1776	0.3202	0.2991	-0.361	0.9593	0.85	0.745
C14	Acylcarnitines	0.01266	0.06601	0.5603	-0.0531	1.174	1.75	1.2
C14:1	Acylcarnitines	0.06042	0.1602	0.5331	-0.296	1.362	0.63	0.45
C14:1-OH	Acylcarnitines	0.02151	0.08365	0.4653	-0.1238	1.054	0.165	0.12
C14:2	Acylcarnitines	0.01477	0.06616	0.5346	-0.05467	1.124	0.185	0.12
C16	Acylcarnitines	0.005954	0.05209	0.6899	0.02849	1.351	11.5	7.2
C16-OH	Acylcarnitines	0.9209	0.945	0.01165	-0.3246	0.3479	0.23	0.225
C16:1	Acylcarnitines	0.008238	0.05812	0.6531	-0.0107	1.317	2.5	1.65
C16:1-OH	Acylcarnitines	0.009178	0.05949	0.5962	-0.05246	1.245	0.24	0.17
C16:2	Acylcarnitines	0.0233	0.08863	0.502	-0.09866	1.103	0.595	0.405
C18	Acylcarnitines	0.0003636	0.01273	0.662	0.2215	1.102	3.5	2.2
C18:1	Acylcarnitines	2.602e-05	0.002277	0.834	0.4301	1.238	12	6.65
C18:1-OH	Acylcarnitines	0.024	0.08901	0.3822	-0.07893	0.8433	0.445	0.35
C18:2	Acylcarnitines	0.007285	0.05812	0.7711	0.005075	1.537	4.8	2.9
lysoPC a C16:0	Lysophosphatidylcholines	0.915	0.945	0.007233	-0.1942	0.2087	35	35
lysoPC a C16:1	Lysophosphatidylcholines	0.4581	0.5938	0.07276	-0.2232	0.3687	1.55	1.45
lysoPC a C17:0	Lysophosphatidylcholines	0.008635	0.05812	0.4809	-0.0203	0.9821	0.73	0.56
lysoPC a C18:0	Lysophosphatidylcholines	0.04688	0.1367	0.1943	-0.09133	0.4799	15.5	13.5
lysoPC a C18:1	Lysophosphatidylcholines	0.3741	0.5249	0.1161	-0.2809	0.513	8.8	8.2
lysoPC a C18:2	Lysophosphatidylcholines	0.4524	0.5938	0.1298	-0.3988	0.6585	14.5	14
lysoPC a C20:3	Lysophosphatidylcholines	0.06569	0.1666	-0.1923	-0.4806	0.09602	1.2	1.4
lysoPC a C20:4	Lysophosphatidylcholines	0.01778	0.07273	0.2403	-0.03111	0.5118	7.9	6.8
lysoPC a C26:0	Lysophosphatidylcholines	0.1265	0.2604	-0.2449	-0.7064	0.2166	0.59	0.645
lysoPC a C26:1	Lysophosphatidylcholines	0.1732	0.3191	-0.2577	-0.83	0.3146	0.45	0.595
lysoPC a C28:1	Lysophosphatidylcholines	0.0409	0.1225	-0.4139	-1.003	0.1756	0.365	0.48
PC aa C24:0	Phosphatidylcholines	0.1519	0.2994	-0.2385	-0.7498	0.2727	0.495	0.55
PC aa C28:1	Phosphatidylcholines	0.6491	0.7651	0.08517	-0.5184	0.6887	0.595	0.575
PC aa C30:0	Phosphatidylcholines	0.9234	0.945	-0.01014	-0.3391	0.3188	30	29.5
PC aa C30:2	Phosphatidylcholines	0.6741	0.7812	-0.08313	-0.7206	0.5543	0.35	0.4
PC aa C32:0	Phosphatidylcholines	0.4796	0.6126	0.1234	-0.4246	0.6714	126	113
PC aa C32:1	Phosphatidylcholines	0.8509	0.9176	0.01307	-0.1928	0.2189	258.5	257
PC aa C32:2	Phosphatidylcholines	0.4922	0.6242	-0.07999	-0.4462	0.2862	34	36
PC aa C32:3	Phosphatidylcholines	0.05202	0.1445	-0.1999	-0.4838	0.08396	3.4	3.85
PC aa C34:1	Phosphatidylcholines	0.06849	0.1695	0.1668	-0.09534	0.4289	781	718.5
PC aa C34:2	Phosphatidylcholines	0.3309	0.4825	-0.07032	-0.2809	0.1403	1116	1188
PC aa C34:3	Phosphatidylcholines	0.5605	0.6764	-0.04681	-0.281	0.1874	114	120
PC aa C34:4	Phosphatidylcholines	0.3301	0.4825	-0.1155	-0.4833	0.2523	14.5	15.5
PC aa C36:0	Phosphatidylcholines	0.0359	0.1185	0.3719	-0.1294	0.8732	28	20.5
PC aa C36:1	Phosphatidylcholines	0.01391	0.06616	0.3432	-0.04154	0.728	63	54
PC aa C36:2	Phosphatidylcholines	0.01441	0.06616	0.2572	-0.02983	0.5443	263.5	229.5
PC aa C36:3	Phosphatidylcholines	0.2564	0.4079	0.1304	-0.2164	0.4772	358.5	350.5
PC aa C36:4	Phosphatidylcholines	0.8025	0.8777	0.021	-0.2365	0.2785	1068	1050
PC aa C36:5	Phosphatidylcholines	0.5415	0.6627	0.04629	-0.1763	0.2689	75	74
PC aa C36:6	Phosphatidylcholines	0.351	0.5076	0.159	-0.3621	0.6802	6.9	6.3
PC aa C38:0	Phosphatidylcholines	0.1171	0.2469	0.2798	-0.2488	0.8085	4.4	3.6
PC aa C38:1	Phosphatidylcholines	0.154	0.2994	0.5414	-0.6074	1.69	1.95	1.25
PC aa C38:3	Phosphatidylcholines	0.6734	0.7812	0.03599	-0.2161	0.288	21	21
PC aa C38:4	Phosphatidylcholines	0.01202	0.06575	0.2461	-0.01938	0.5117	204	170.5
PC aa C38:5	Phosphatidylcholines	0.06385	0.1647	0.1765	-0.0975	0.4506	266.5	247.5
PC aa C38:6	Phosphatidylcholines	0.09258	0.2077	0.2028	-0.1465	0.5522	614.5	525
PC aa C40:2	Phosphatidylcholines	0.1036	0.2265	0.2461	-0.1988	0.6909	0.555	0.545
PC aa C40:3	Phosphatidylcholines	0.4042	0.5483	0.1187	-0.3179	0.5552	0.68	0.63
PC aa C40:4	Phosphatidylcholines	0.1005	0.2226	0.3244	-0.2609	0.9097	5.7	4.65
PC aa C40:5	Phosphatidylcholines	0.05602	0.1532	0.3508	-0.1779	0.8794	22	17
PC aa C40:6	Phosphatidylcholines	0.01164	0.06568	0.4865	-0.02345	0.9964	69.5	52.5
PC aa C42:1	Phosphatidylcholines	0.07695	0.182	0.5042	-0.3298	1.338	0.64	0.51
PC aa C42:2	Phosphatidylcholines	0.1819	0.3202	0.1862	-0.2205	0.5929	0.55	0.485
PC aa C42:4	Phosphatidylcholines	0.2032	0.3387	0.1652	-0.2149	0.5452	0.34	0.305
PC aa C42:5	Phosphatidylcholines	0.2184	0.3572	0.2233	-0.323	0.7695	0.63	0.605
PC ae C30:0	Phosphatidylcholines	0.07069	0.1695	-0.1154	-0.244	0.01307	1.2	1.3
PC ae C30:1	Phosphatidylcholines	0.5093	0.6413	-0.07957	-0.4619	0.3027	0.76	0.855
PC ae C32:1	Phosphatidylcholines	0.1611	0.3033	0.1325	-0.147	0.412	10	9.55
PC ae C32:2	Phosphatidylcholines	0.8625	0.9176	0.02055	-0.3493	0.3904	1.7	1.6
PC ae C34:0	Phosphatidylcholines	0.07	0.1695	0.2765	-0.1626	0.7157	3.95	3.25
PC ae C34:1	Phosphatidylcholines	0.6859	0.7846	0.06048	-0.4075	0.5284	28.5	29
PC ae C34:2	Phosphatidylcholines	0.969	0.9745	-0.003993	-0.3225	0.3146	15.5	16
PC ae C34:3	Phosphatidylcholines	0.04047	0.1225	0.26	-0.09989	0.6199	8.25	6.65
PC ae C36:0	Phosphatidylcholines	0.6515	0.7651	0.05821	-0.3407	0.4571	1.45	1.55
PC ae C36:1	Phosphatidylcholines	0.08954	0.2035	0.1557	-0.1047	0.4161	11.5	11
PC ae C36:2	Phosphatidylcholines	0.4707	0.6056	0.1037	-0.3399	0.5473	17.5	17
PC ae C36:3	Phosphatidylcholines	0.8651	0.9176	-0.0174	-0.3269	0.2921	9.05	9.6
PC ae C36:4	Phosphatidylcholines	0.2627	0.4104	0.1221	-0.2022	0.4464	12	11
PC ae C36:5	Phosphatidylcholines	0.002362	0.03235	0.4313	0.06923	0.7934	13.5	9.9
PC ae C38:0	Phosphatidylcholines	0.03841	0.1225	0.2113	-0.07429	0.4969	42	36
PC ae C38:1	Phosphatidylcholines	0.8629	0.9176	0.01926	-0.3129	0.3514	1.7	1.8
PC ae C38:2	Phosphatidylcholines	0.2245	0.3637	0.1686	-0.2497	0.5869	3.2	2.95
PC ae C38:3	Phosphatidylcholines	0.7533	0.856	-0.04063	-0.4419	0.3607	2.85	3.2
PC ae C38:4	Phosphatidylcholines	0.3749	0.5249	0.101	-0.2469	0.4488	16	15
PC ae C38:5	Phosphatidylcholines	0.1144	0.244	0.1255	-0.1021	0.353	11	10
PC ae C38:6	Phosphatidylcholines	0.04025	0.1225	0.2673	-0.102	0.6365	17	13.5
PC ae C40:0	Phosphatidylcholines	0.01513	0.06616	0.4721	-0.06637	1.011	68	50
PC ae C40:1	Phosphatidylcholines	0.04825	0.1384	0.3823	-0.1747	0.9394	46	35.5
PC ae C40:2	Phosphatidylcholines	0.2614	0.4104	0.1026	-0.1679	0.3731	2.3	2.35
PC ae C40:3	Phosphatidylcholines	0.3938	0.5383	0.1126	-0.291	0.5162	0.445	0.43
PC ae C40:4	Phosphatidylcholines	0.3261	0.4825	0.08868	-0.176	0.3534	2.7	2.5
PC ae C40:5	Phosphatidylcholines	0.234	0.3757	0.141	-0.2164	0.4984	3.25	3.2
PC ae C40:6	Phosphatidylcholines	0.1817	0.3202	0.1872	-0.2308	0.6052	6.35	5.65
PC ae C42:1	Phosphatidylcholines	0.003317	0.03415	0.3155	0.04713	0.584	2.25	1.75
PC ae C42:2	Phosphatidylcholines	0.0006542	0.01604	0.5169	0.1517	0.882	2.35	1.65
PC ae C42:3	Phosphatidylcholines	0.002403	0.03235	0.6606	0.09701	1.224	4.3	2.45
PC ae C42:4	Phosphatidylcholines	0.3271	0.4825	0.4824	-1.033	1.998	0.155	0.135
PC ae C44:3	Phosphatidylcholines	0.000796	0.01604	0.5141	0.1449	0.8833	2.2	1.45
PC ae C44:4	Phosphatidylcholines	0.0002594	0.01135	0.5327	0.2143	0.851	1.25	0.825
PC ae C44:5	Phosphatidylcholines	0.001693	0.02963	0.4378	0.1003	0.7754	0.68	0.46
SM (OH) C14:1	Sphingomyelins	0.003201	0.03415	0.616	0.07059	1.161	1.15	0.685
SM (OH) C16:1	Sphingomyelins	0.02441	0.08901	0.4115	-0.1069	0.9298	3	2.4
SM (OH) C22:1	Sphingomyelins	0.05039	0.1422	0.3657	-0.1704	0.9018	2.7	2.25
SM (OH) C22:2	Sphingomyelins	0.0008249	0.01604	0.6404	0.1729	1.108	1.5	0.965
SM (OH) C24:1	Sphingomyelins	0.1202	0.2503	0.6517	-0.6129	1.916	0.37	0.275
SM C16:0	Sphingomyelins	0.004161	0.04046	0.2865	0.02844	0.5446	49.5	41
SM C16:1	Sphingomyelins	0.01066	0.06218	0.3813	-0.03664	0.7993	3	2.25
SM C18:0	Sphingomyelins	0.521	0.6466	0.07515	-0.2859	0.4362	110	105.5
SM C18:1	Sphingomyelins	0.02523	0.09011	0.2384	-0.05636	0.5332	8.55	7.55
SM C20:2	Sphingomyelins	0.002955	0.03415	1.319	0.2458	2.392	0.28	0.115
SM C24:0	Sphingomyelins	0.064	0.1647	0.2954	-0.1658	0.7565	8.2	7.5
SM C24:1	Sphingomyelins	0.01787	0.07273	0.3572	-0.05422	0.7686	20.5	17
SM C26:1	Sphingomyelins	0.1057	0.2283	0.4478	-0.343	1.239	0.115	0.092
H1	Hexoses	0.575	0.6893	0.0798	-0.3504	0.5101	2181	1952
Hex-P	Energy Metabolism	0.7612	0.8594	-0.08679	-0.9242	0.7506	55.56	53.87
Lac	Energy Metabolism	0.1339	0.2693	-0.1503	-0.4426	0.142	18850	21030
Pent-P	Energy Metabolism	0.2738	0.4203	0.2604	-0.4226	0.9434	29.2	23.63
Fum	Energy Metabolism	0.03162	0.1085	0.1974	-0.04338	0.4381	181.8	159
Suc	Energy Metabolism	0.3934	0.5383	-0.1606	-0.7248	0.4035	130.3	153.9
Pyr+OAA	Energy Metabolism	0.9136	0.945	0.03126	-0.8513	0.9138	371.4	389.8
12S-HETE	Eicosanoids	0.1785	0.3202	1.101	-1.311	3.513	59.5	18.21
13S-HODE	Eicosanoids	0.0132	0.06601	0.8927	-0.0646	1.85	193.3	91.67
15S-HETE	Eicosanoids	0.003035	0.03415	1.342	0.2698	2.414	13.23	4.352
9-HODE	Eicosanoids	0.009626	0.06016	0.8888	-0.02316	1.801	152	71.01
AA	Eicosanoids	0.0155	0.06616	0.3725	-0.01957	0.7646	8529	6402
DHA	Eicosanoids	0.01894	0.07531	0.4095	-0.04177	0.8608	3278	2484
PGD2	Eicosanoids	0.008368	0.05812	1.27	0.04785	2.492	9.202	3.133
PGE2	Eicosanoids	0.7966	0.8767	0.05335	-0.5638	0.6705	15.2	14.45
TXB2	Eicosanoids	0.01046	0.06218	1.046	0.03468	2.056	2.11	0.955
CA	Bile Acids	0.0002445	0.01135	2.262	0.9603	3.564	63.88	14.41
CDCA	Bile Acids	0.03543	0.1185	0.6003	-0.1615	1.362	10.52	7.13
GCA	Bile Acids	0.07062	0.1695	3.999	-2.331	10.33	6.22	0.125
MCA(b)	Bile Acids	0.00195	0.03103	1.98	0.496	3.464	189	57.04
MCA(o)	Bile Acids	0.01313	0.06601	1.005	0.04312	1.967	30.42	14.86
TCA	Bile Acids	0.1866	0.3202	1.265	-1.505	4.035	182.8	53.48
TDCA	Bile Acids	0.0005327	0.01554	-1.616	-2.587	-0.6453	1.56	5.195
TMCA(a+b)	Bile Acids	0.08485	0.198	1.446	-0.9534	3.846	178.6	66.52
TUDCA	Bile Acids	0.9886	0.9886	-0.003926	-0.8071	0.7992	6.88	6.19

## Sheet: All metabolites in liver
Statistical analysis of metabolite measurements in liver samples
Metabolite	Chemical class	p-value t-test	FDR p-value t-test	log2 Fold change	Lower adj. 95%CI log2 FC	Uppper adj. 95%CI log2 FC	Median concentration in KO samples (nmol/g tissue)	Median concentration in control samples (nmol/g tissue)
Ala	Amino acids	0.3068	0.5229	-0.1238	-0.5058	0.2582	3167	3172
Asn	Amino acids	0.3629	0.5712	0.1504	-0.3852	0.6859	135	120.5
Asp	Amino acids	0.6079	0.7489	0.1408	-0.7637	1.045	343	324.5
Cit	Amino acids	0.2978	0.5222	0.3717	-0.788	1.531	26	22
Gln	Amino acids	0.3459	0.557	-0.1302	-0.5656	0.3051	3622	3805
Glu	Amino acids	0.4871	0.6733	-0.2068	-1.182	0.7685	1149	1221
Gly	Amino acids	0.3348	0.5526	-0.1579	-0.698	0.3821	1927	2309
His	Amino acids	0.8215	0.8952	-0.01913	-0.2747	0.2365	428.5	426.5
Ile	Amino acids	0.2135	0.4372	-0.2334	-0.8227	0.3559	217	267
Leu	Amino acids	0.8662	0.9146	0.02554	-0.4721	0.5232	424	425
Lys	Amino acids	0.4028	0.6063	-0.2515	-1.245	0.7422	350.5	473
Met	Amino acids	0.0166	0.1085	-0.5113	-1.123	0.1003	69.5	104.5
Orn	Amino acids	0.593	0.7418	0.1735	-0.8955	1.242	143.5	157.5
Phe	Amino acids	0.2707	0.5029	-0.1739	-0.6723	0.3246	192.5	232.5
Pro	Amino acids	0.9714	0.9889	-0.008375	-0.7771	0.7604	328.5	328
Ser	Amino acids	0.7404	0.8563	0.07534	-0.6675	0.8182	373	301.5
Thr	Amino acids	0.7596	0.8667	-0.05134	-0.5866	0.484	255.5	282
Trp	Amino acids	0.8047	0.8826	0.0292	-0.3295	0.3879	47	50.5
Tyr	Amino acids	0.9651	0.9889	-0.007412	-0.558	0.5431	212.5	194
Val	Amino acids	0.9968	0.9968	-0.0007638	-0.6392	0.6377	375	347.5
ADMA	Biogenic amines	0.3076	0.5229	0.1595	-0.3256	0.6446	2.35	2.05
alpha-AAA	Biogenic amines	0.01142	0.09429	0.628	-0.03023	1.286	52.5	31
Carnosine	Biogenic amines	0.2285	0.4625	-0.2991	-1.11	0.5115	0.55	0.735
Histamine	Biogenic amines	0.2418	0.4779	0.3727	-0.6298	1.375	0.315	0.23
Met-SO	Biogenic amines	0.4188	0.6138	-0.1751	-0.8273	0.4771	2.35	2.75
Putrescine	Biogenic amines	0.6356	0.7672	-0.07089	-0.5628	0.4211	2.45	2.35
Sarcosine	Biogenic amines	0.1834	0.3898	0.4355	-0.6282	1.499	198	144.5
SDMA	Biogenic amines	1.968e-05	0.001673	1.099	0.5645	1.633	0.93	0.415
Serotonin	Biogenic amines	0.411	0.6129	0.1196	-0.3417	0.5809	2.35	2.2
Spermidine	Biogenic amines	0.02446	0.1428	-0.5203	-1.203	0.1627	24.5	36.5
Spermine	Biogenic amines	0.3516	0.5586	0.1608	-0.4011	0.7227	3.55	2.9
Taurine	Biogenic amines	0.2534	0.4896	-0.1068	-0.3909	0.1773	2894	3029
C0	Acylcarnitines	0.6462	0.7682	0.1045	-0.6352	0.8442	137.5	158.5
C2	Acylcarnitines	0.08893	0.2567	0.3754	-0.2801	1.031	37.5	31.5
C3	Acylcarnitines	0.04407	0.1746	0.9069	-0.4361	2.25	1.75	0.96
C3-DC (C4-OH)	Acylcarnitines	0.08831	0.2567	0.7089	-0.6023	2.02	4.3	2.7
C4	Acylcarnitines	0.37	0.5771	0.3184	-0.7891	1.426	3	2.15
C5	Acylcarnitines	0.2979	0.5222	0.5475	-1.152	2.247	0.62	0.425
C5-DC (C6-OH)	Acylcarnitines	0.03457	0.1553	0.718	-0.3239	1.76	0.895	0.5
C5-M-DC	Acylcarnitines	0.09627	0.2728	0.4554	-0.4078	1.319	0.47	0.33
C5-OH (C3-DC-M)	Acylcarnitines	0.4166	0.6138	0.2697	-0.8284	1.368	0.66	0.61
C7-DC	Acylcarnitines	0.4489	0.6467	-0.1538	-0.8117	0.5042	0.33	0.39
C16	Acylcarnitines	0.07174	0.2345	0.3519	-0.2436	0.9474	0.805	0.58
C16-OH	Acylcarnitines	0.0007552	0.0214	0.6218	0.1703	1.073	0.0685	0.0445
C18	Acylcarnitines	0.04111	0.1705	0.7105	-0.3553	1.776	0.865	0.465
C18:1	Acylcarnitines	0.0003676	0.0125	0.6954	0.2236	1.167	0.825	0.48
C18:2	Acylcarnitines	0.008829	0.08339	0.5753	-0.04027	1.191	0.32	0.2
lysoPC a C16:0	Lysophosphatidylcholines	0.03471	0.1553	-0.2257	-0.5378	0.08649	124	135.5
lysoPC a C16:1	Lysophosphatidylcholines	0.01637	0.1085	-0.9081	-2.036	0.2195	2.95	6.4
lysoPC a C17:0	Lysophosphatidylcholines	0.2901	0.5222	0.1169	-0.2341	0.4679	2	1.8
lysoPC a C18:0	Lysophosphatidylcholines	0.9038	0.9378	0.01723	-0.4516	0.486	55.5	53
lysoPC a C18:1	Lysophosphatidylcholines	0.0145	0.1072	-0.4226	-0.9272	0.08191	32	45
lysoPC a C18:2	Lysophosphatidylcholines	0.004722	0.05352	-0.4016	-0.7929	-0.01035	70	91
lysoPC a C20:3	Lysophosphatidylcholines	0.0122	0.09429	-0.8063	-1.746	0.1331	4.65	9.15
lysoPC a C20:4	Lysophosphatidylcholines	0.4578	0.654	-0.1307	-0.7103	0.449	57.5	63
lysoPC a C24:0	Lysophosphatidylcholines	0.3316	0.5526	0.1362	-0.3125	0.5849	1.35	1.2
lysoPC a C26:0	Lysophosphatidylcholines	0.6758	0.7869	0.05743	-0.3624	0.4773	1.1	1.05
lysoPC a C26:1	Lysophosphatidylcholines	0.843	0.9019	-0.03816	-0.662	0.5857	0.675	0.75
lysoPC a C28:0	Lysophosphatidylcholines	0.8423	0.9019	-0.03081	-0.5473	0.4857	0.695	0.755
lysoPC a C28:1	Lysophosphatidylcholines	0.1908	0.3956	0.1584	-0.2202	0.537	0.755	0.72
PC aa C24:0	Phosphatidylcholines	0.2565	0.49	0.1634	-0.3087	0.6355	0.705	0.6
PC aa C28:1	Phosphatidylcholines	0.1901	0.3956	0.1718	-0.2499	0.5935	0.805	0.695
PC aa C30:0	Phosphatidylcholines	0.8716	0.9146	0.01657	-0.3154	0.3486	5.95	6.1
PC aa C30:2	Phosphatidylcholines	0.9853	0.9968	0.008311	-1.448	1.465	0.275	0.21
PC aa C32:0	Phosphatidylcholines	0.02376	0.1428	0.2089	-0.04961	0.4675	85.5	73.5
PC aa C32:1	Phosphatidylcholines	0.03991	0.1696	-0.7791	-1.956	0.3973	72	126.5
PC aa C32:2	Phosphatidylcholines	0.267	0.5029	-0.2714	-1.053	0.5101	16.5	19.5
PC aa C32:3	Phosphatidylcholines	0.6615	0.7756	-0.05337	-0.4247	0.3179	0.98	1.045
PC aa C34:1	Phosphatidylcholines	0.1621	0.376	-0.2292	-0.7582	0.2998	637.5	761
PC aa C34:2	Phosphatidylcholines	0.1703	0.376	-0.09737	-0.3164	0.1217	1569	1694
PC aa C34:3	Phosphatidylcholines	0.05332	0.1892	-0.4035	-1.057	0.2504	157	228
PC aa C34:4	Phosphatidylcholines	0.1683	0.376	-0.2197	-0.7157	0.2764	10.5	11
PC aa C36:1	Phosphatidylcholines	0.1395	0.3467	-0.2214	-0.6987	0.2559	80.5	97
PC aa C36:2	Phosphatidylcholines	0.9683	0.9889	-0.004021	-0.3295	0.3215	627.5	623
PC aa C36:3	Phosphatidylcholines	0.315	0.5302	-0.1564	-0.6685	0.3557	369	430.5
PC aa C36:4	Phosphatidylcholines	0.9047	0.9378	-0.01345	-0.3904	0.3635	1115	1082
PC aa C36:5	Phosphatidylcholines	0.01617	0.1085	-0.4429	-0.9788	0.09299	90	126
PC aa C36:6	Phosphatidylcholines	0.5387	0.711	-0.1291	-0.8212	0.563	6.4	7.05
PC aa C38:0	Phosphatidylcholines	0.1369	0.3467	0.2085	-0.2329	0.6499	5.85	5.1
PC aa C38:3	Phosphatidylcholines	0.03402	0.1553	-0.2691	-0.6327	0.09449	59	72.5
PC aa C38:4	Phosphatidylcholines	0.04557	0.1761	0.3135	-0.1696	0.7966	514	398.5
PC aa C38:5	Phosphatidylcholines	0.4025	0.6063	0.1055	-0.3054	0.5165	284.5	274
PC aa C38:6	Phosphatidylcholines	0.04415	0.1746	0.2092	-0.1091	0.5275	1038	887.5
PC aa C40:2	Phosphatidylcholines	0.1076	0.2857	-0.2174	-0.6496	0.2149	0.9	1
PC aa C40:3	Phosphatidylcholines	0.1062	0.2857	-0.4282	-1.274	0.4172	1.35	1.85
PC aa C40:4	Phosphatidylcholines	0.02604	0.1428	-0.3775	-0.8826	0.1275	6.35	8.35
PC aa C40:5	Phosphatidylcholines	0.5192	0.7005	0.06116	-0.2416	0.3639	24	24
PC aa C40:6	Phosphatidylcholines	0.0764	0.2433	0.3676	-0.278	1.013	177	121
PC aa C42:1	Phosphatidylcholines	0.2721	0.5029	0.1929	-0.3804	0.7662	0.29	0.245
PC aa C42:2	Phosphatidylcholines	0.7883	0.8759	0.03588	-0.408	0.4797	0.55	0.545
PC aa C42:4	Phosphatidylcholines	0.5994	0.7438	-0.07328	-0.5392	0.3927	0.605	0.615
PC aa C42:5	Phosphatidylcholines	0.1773	0.3815	-0.2275	-0.7749	0.3199	1.075	1.25
PC aa C42:6	Phosphatidylcholines	0.001812	0.02567	-0.6376	-1.188	-0.08697	1.6	2.85
PC ae C30:1	Phosphatidylcholines	0.08704	0.2567	-0.3941	-1.08	0.292	0.29	0.395
PC ae C30:2	Phosphatidylcholines	0.5617	0.7277	-0.06896	-0.4578	0.3199	0.375	0.4
PC ae C32:1	Phosphatidylcholines	0.7776	0.8746	-0.0287	-0.3653	0.3079	2.35	2.45
PC ae C32:2	Phosphatidylcholines	0.7496	0.861	0.04252	-0.3989	0.4839	0.53	0.505
PC ae C34:0	Phosphatidylcholines	0.1745	0.3802	0.1534	-0.1955	0.5024	2.5	2.3
PC ae C34:1	Phosphatidylcholines	0.1407	0.3467	-0.21	-0.653	0.2329	15.5	18.5
PC ae C34:2	Phosphatidylcholines	0.782	0.8746	-0.03854	-0.483	0.4059	14	15
PC ae C34:3	Phosphatidylcholines	0.5181	0.7005	-0.08138	-0.4858	0.3231	1.65	1.75
PC ae C36:0	Phosphatidylcholines	0.4956	0.6795	-0.06359	-0.3424	0.2152	1.8	1.9
PC ae C36:1	Phosphatidylcholines	0.5691	0.7277	-0.0686	-0.4515	0.3144	10	11
PC ae C36:2	Phosphatidylcholines	0.3438	0.557	0.1179	-0.2775	0.5134	23.5	22.5
PC ae C36:3	Phosphatidylcholines	0.6363	0.7672	-0.1058	-0.8535	0.6418	12.5	14
PC ae C36:4	Phosphatidylcholines	0.1054	0.2857	0.2325	-0.2204	0.6853	15.5	14.5
PC ae C36:5	Phosphatidylcholines	0.004067	0.04938	0.372	0.02847	0.7155	5.55	4.4
PC ae C38:0	Phosphatidylcholines	0.1155	0.3021	-0.2013	-0.6021	0.1996	44	54.5
PC ae C38:1	Phosphatidylcholines	0.5693	0.7277	-0.07306	-0.4975	0.3514	2.3	2.5
PC ae C38:2	Phosphatidylcholines	0.302	0.5229	-0.1347	-0.5589	0.2895	7.35	7.85
PC ae C38:3	Phosphatidylcholines	0.8497	0.9028	-0.02389	-0.4395	0.3917	5.95	6.1
PC ae C38:4	Phosphatidylcholines	0.01166	0.09429	0.4452	-0.07112	0.9615	27	19.5
PC ae C38:5	Phosphatidylcholines	0.1542	0.3744	0.1805	-0.2145	0.5756	15.5	14
PC ae C38:6	Phosphatidylcholines	0.0616	0.2094	0.2386	-0.1412	0.6184	9.25	7.8
PC ae C40:0	Phosphatidylcholines	0.1697	0.376	0.2442	-0.3324	0.8208	158.5	135.5
PC ae C40:1	Phosphatidylcholines	0.06402	0.2134	0.2661	-0.1835	0.7156	52.5	47.5
PC ae C40:2	Phosphatidylcholines	0.8436	0.9019	-0.02083	-0.3731	0.3314	3.7	3.7
PC ae C40:3	Phosphatidylcholines	0.1598	0.376	0.2014	-0.2473	0.6501	1.85	1.6
PC ae C40:4	Phosphatidylcholines	0.5437	0.711	0.06996	-0.3066	0.4466	6.5	6.1
PC ae C40:5	Phosphatidylcholines	0.03228	0.1553	0.3797	-0.1487	0.908	6.4	5.15
PC ae C40:6	Phosphatidylcholines	0.02567	0.1428	0.5263	-0.164	1.217	13	8.8
PC ae C42:0	Phosphatidylcholines	0.158	0.376	-0.1965	-0.6309	0.2379	4.35	5.15
PC ae C42:1	Phosphatidylcholines	0.2959	0.5222	0.1775	-0.3795	0.7345	3.65	3.1
PC ae C42:2	Phosphatidylcholines	0.1239	0.3192	-0.1979	-0.5909	0.1951	2.2	2.6
PC ae C42:3	Phosphatidylcholines	0.8011	0.8826	-0.02397	-0.3343	0.2864	9.6	9.65
PC ae C42:4	Phosphatidylcholines	0.07729	0.2433	-0.151	-0.4042	0.1022	0.685	0.775
PC ae C44:3	Phosphatidylcholines	0.249	0.4865	0.1614	-0.2716	0.5944	0.5	0.425
PC ae C44:5	Phosphatidylcholines	0.1683	0.376	-0.1554	-0.5159	0.205	0.89	1.025
PC ae C44:6	Phosphatidylcholines	0.3473	0.557	-0.1734	-0.7733	0.4265	0.28	0.34
SM (OH) C14:1	Sphingomyelins	0.001551	0.02567	1.024	0.1668	1.881	3.5	1.5
SM (OH) C16:1	Sphingomyelins	0.0001926	0.01091	0.754	0.2814	1.227	1.5	0.815
SM (OH) C22:1	Sphingomyelins	0.00176	0.02567	0.5881	0.09623	1.08	16	10.25
SM (OH) C22:2	Sphingomyelins	0.001332	0.02516	0.6419	0.1247	1.159	5.2	3.25
SM (OH) C24:1	Sphingomyelins	0.002675	0.03498	0.7678	0.07245	1.463	0.97	0.51
SM C16:0	Sphingomyelins	0.0003589	0.0125	0.5948	0.1908	0.9987	95	61.5
SM C16:1	Sphingomyelins	0.03913	0.1696	0.4171	-0.2002	1.034	3.4	2.35
SM C18:0	Sphingomyelins	7.17e-06	0.001219	0.9858	0.5526	1.419	17.5	8.4
SM C18:1	Sphingomyelins	0.00118	0.02507	0.9229	0.1725	1.673	1.35	0.645
SM C24:0	Sphingomyelins	0.05316	0.1892	-0.2051	-0.5269	0.1168	28.5	31.5
SM C24:1	Sphingomyelins	0.001048	0.02507	0.5661	0.1075	1.025	65.5	44
H1	Hexoses	0.7733	0.8746	-0.02653	-0.3244	0.2713	52800	53380
Hex-P	Energy Metabolism	0.03259	0.1553	-0.3728	-0.8726	0.1269	248.8	334.4
Lac	Energy Metabolism	0.5765	0.7314	-0.06857	-0.4728	0.3357	8700	9020
Pent-P	Energy Metabolism	0.005998	0.06373	-0.5445	-1.112	0.02253	25.87	36.5
Fum	Energy Metabolism	0.4448	0.6463	0.1187	-0.3973	0.6347	152.7	130.7
Suc	Energy Metabolism	0.4665	0.6604	0.08614	-0.3026	0.4749	665.7	638.3
12S-HETE	Eicosanoids	0.2891	0.5222	-0.364	-1.455	0.7274	9.995	13.4
14(15)-EpETE	Eicosanoids	0.5396	0.711	-0.2544	-1.594	1.085	0.2601	0.2889
15S-HETE	Eicosanoids	0.5935	0.7418	-0.1355	-0.9526	0.6817	5.381	5.381
5S-HpETE	Eicosanoids	0.6456	0.7682	-0.2722	-2.171	1.626	1.207	1.01
9-HODE	Eicosanoids	0.9962	0.9968	-0.001	-0.6799	0.6779	52.06	54.78
AA	Eicosanoids	0.5319	0.711	-0.2103	-1.317	0.8961	45220	55030
DHA	Eicosanoids	0.3923	0.6063	-0.3521	-1.709	1.005	21890	30050
PGE2	Eicosanoids	0.4739	0.6604	-0.4822	-2.646	1.681	44.41	67.49
TXB2	Eicosanoids	0.05705	0.1979	0.4775	-0.2482	1.203	1.11	0.79
CA	Bile Acids	0.008535	0.08339	2.103	-0.1701	4.377	2285	770.8
DCA	Bile Acids	0.2339	0.4677	-1.609	-5.778	2.561	10.32	65.03
GCA	Bile Acids	0.05341	0.1892	1.437	-0.8281	3.702	277.8	62.61
GUDCA	Bile Acids	0.03404	0.1553	1.187	-0.4132	2.788	20.07	8.795
LCA	Bile Acids	0.6149	0.7521	-0.3354	-2.459	1.788	9.06	10.67
MCA(a)	Bile Acids	0.02105	0.1325	1.343	-0.362	3.049	219.4	96.6
MCA(b)	Bile Acids	0.08045	0.2487	1.138	-0.8187	3.094	3436	1489
MCA(o)	Bile Acids	0.009374	0.08387	1.968	-0.1466	4.083	663.7	160
TCA	Bile Acids	0.403	0.6063	0.5238	-1.529	2.577	87020	52490
TCDCA	Bile Acids	0.6534	0.7714	0.1746	-1.087	1.436	4348	3279
TDCA	Bile Acids	0.08908	0.2567	-1.872	-5.255	1.511	810.5	7512
TLCA	Bile Acids	0.4726	0.6604	-0.46	-2.462	1.542	58	99.68
TMCA(a+b)	Bile Acids	0.1031	0.2857	1.32	-1.269	3.909	275200	72050
TUDCA	Bile Acids	0.03459	0.1553	0.977	-0.4362	2.39	7085	2839
UDCA	Bile Acids	0.04899	0.1851	1.922	-1.079	4.924	75.96	29.15

## Sheet: Changed in serum at FDR≤0.05
Metabolites significantly changed in serum samples of Trpm6 null mice (FDR p-values ≤0.05)
Code	Metabolite	HMDB*	Chemical class	P-value t-test	FDR p-value t-test	log2 Fold change	Lower adj. 95%CI log2 FC**	Uppper adj. 95%CI log2 FC**	Median concentration in KO samples (nM)	Median concentration in control samples (nM)
GCA	Glycocholic acid	HMDB00138	Bile Acids	0.002037	0.01684	3.107	0.8351	5.379	12.83	1.835
TMCA(a+b)	α- & β- Tauromuricholic acid	HMDB00932	Bile Acids	0.0002009	0.00426	2.942	1.224	4.66	1578	171.6
TCA	Taurocholic acid	HMDB00036	Bile Acids	0.004864	0.0293	2.86	0.3368	5.383	1072	130
UDCA	Ursodeoxycholic acid	HMDB00946	Bile Acids	0.002945	0.02202	2.468	0.5667	4.369	314.7	44.63
TCDCA	Taurochenodeoxycholic acid	HMDB00951	Bile Acids	0.003257	0.02223	2.34	0.4163	4.265	54.11	9.77
TUDCA	Tauroursodeoxycholic Acid	HMDB00874	Bile Acids	7.766e-05	0.002438	1.927	0.9209	2.934	49.83	16.03
SM C18:0	Sphingomyelin with acyl residue sum C18:0	HMDB01348	Sphingomyelins	2.536e-06	0.0001327	0.9802	0.612	1.348	2.85	1.4
C18:1	Octadecenoylcarnitine (Oleylcarnitine)	HMDB06464	Acylcarnitines	0.009381	0.04751	0.9336	0.03342	1.834	0.285	0.135
SM (OH) C14:1	Hydroxysphingomyelin with acyl residue sum C14:1	HMDB13462	Sphingomyelins	0.007011	0.03669	0.5887	0.039	1.138	0.95	0.62
Kynurenine	Kynurenine	HMDB00684	Biogenic amines	0.002221	0.01744	0.5879	0.1439	1.032	1.75	1.3
SM (OH) C16:1	Hydroxysphingomyelin with acyl residue sum C16:1	HMDB13463	Sphingomyelins	0.000217	0.00426	0.5752	0.2357	0.9147	0.33	0.22
Spermidine	Spermidine	HMDB01257	Biogenic amines	0.0007771	0.009385	0.5493	0.2093	0.8893	4.45	2.95
SM C18:1	Sphingomyelin with acyl residue sum C18:1	HMDB12100	Sphingomyelins	0.009792	0.04804	0.5442	0.003953	1.084	0.975	0.635
C18	Octadecanoylcarnitine (Stearylcarnitine)	HMDB00848	Acylcarnitines	0.0006083	0.009385	0.4208	0.1652	0.6764	0.0755	0.057
Trp	Tryptophan	HMDB00929	Amino acids	0.001271	0.01331	0.419	0.1259	0.7122	91.5	71.5
PC ae C40:6	Phosphatidylcholine with acyl-alkyl residue sum C40:6	HMDB13422	Phosphatidylcholines	0.003246	0.02223	0.3751	0.07392	0.6763	3.1	2.4
alpha-AAA	2-Aminoadipic acid	HMDB00510	Biogenic amines	0.0007196	0.009385	0.3575	0.1596	0.5553	5.7	4.45
PC aa C36:1	Phosphatidylcholine with acyl-alkyl residue sum C36:1	HMDB11332	Phosphatidylcholines	0.001533	0.01416	-0.4447	-0.7576	-0.1319	26.5	37.5
PC ae C38:0	Phosphatidylcholine with acyl-alkyl residue sum C38:0	HMDB13419	Phosphatidylcholines	0.005247	0.0293	-0.4516	-0.8171	-0.0861	2.7	3.95
PC aa C38:3	Phosphatidylcholine with acyl-alkyl residue sum C38:3	HMDB13440	Phosphatidylcholines	0.0009331	0.01046	-0.4815	-0.7848	-0.1781	18	25.5
PC ae C38:1	Phosphatidylcholine with acyl-alkyl residue sum C38:1	HMDB08586	Phosphatidylcholines	0.001514	0.01416	-0.5207	-0.9009	-0.1404	0.635	0.885
PC aa C40:2	Phosphatidylcholine with acyl-alkyl residue sum C40:2	HMDB08589	Phosphatidylcholines	0.0006612	0.009385	-0.6302	-1.038	-0.2227	0.285	0.44
PC aa C34:1	Phosphatidylcholine with acyl-alkyl residue sum C34:1	HMDB11210	Phosphatidylcholines	0.005321	0.0293	-0.6406	-1.198	-0.08374	103	168
lysoPC a C18:1	Lysophosphatidylcholine with acyl residue C18:1	HMDB02815	Lysophosphatidylcholines	0.004347	0.0273	-0.69	-1.278	-0.1022	30	56.5
PC aa C34:3	Phosphatidylcholine with acyl-alkyl residue sum C34:3	HMDB11211	Phosphatidylcholines	0.005412	0.0293	-0.6908	-1.292	-0.08988	10.5	18
SM C24:0	Sphingomyelin with acyl residue sum C24:0	HMDB11697	Sphingomyelins	0.001655	0.01444	-0.6908	-1.209	-0.173	7.85	13
PC aa C42:5	Phosphatidylcholine with acyl-alkyl residue sum C42:5	HMDB13451	Phosphatidylcholines	0.0006368	0.009385	-0.6994	-1.157	-0.242	0.26	0.415
PC aa C40:4	Phosphatidylcholine with acyl-alkyl residue sum C40:4	HMDB08598	Phosphatidylcholines	1.764e-05	0.0006922	-0.7295	-1.027	-0.4322	1.75	2.95
lysoPC a C16:1	Lysophosphatidylcholine with acyl residue C16:1	HMDB10383	Lysophosphatidylcholines	0.004251	0.0273	-0.8844	-1.636	-0.1324	3.85	7.8
PC aa C42:6	Phosphatidylcholine with acyl-alkyl residue sum C42:6	HMDB08513	Phosphatidylcholines	6.432e-07	5.049e-05	-1.211	-1.602	-0.8196	0.39	1
lysoPC a C20:3	Lysophosphatidylcholine with acyl residue C20:3	HMDB10393	Lysophosphatidylcholines	0.0001273	0.003331	-1.283	-1.968	-0.5985	3.4	8.75
PC aa C40:3	Phosphatidylcholine with acyl-alkyl residue sum C40:3	HMDB08622	Phosphatidylcholines	2.198e-07	3.452e-05	-1.345	-1.746	-0.9446	0.29	0.745
Notes:
*Accession number in the Human Metabolome Database (www.hmdb.ca)
**95% confidence interval of the fold change (log2) calculated from linear model coefficients and adjusted for multiple testing

## Sheet:  Changed in muscle at FDR≤0.05
Metabolites significantly changed in gastrocnemius muscle samples of Trpm6 null mice (FDR p-values ≤0.05)
Code	Metabolite	HMDB*	Chemical class	P-value t-test	FDR p-value t-test	log2 Fold change	Lower adj. 95%CI log2 FC**	Uppper adj. 95%CI log2 FC**	Median concentration in KO samples (nmol/g tissue)	Median concentration in control samples (nmol/g tissue)
CA	Cholic Acid	HMDB00619	Bile Acids	0.0002445	0.01135	2.262	0.9603	3.564	63.88	14.41
MCA(b)	β- Muricholic acid	HMDB00415	Bile Acids	0.00195	0.03103	1.98	0.496	3.464	189	57.04
15S-HETE	15(S)-hydroxy-5Z,8Z,11Z,13E-eicosatetraenoic acid	HMDB03876	Eicosanoids	0.003035	0.03415	1.342	0.2698	2.414	13.23	4.352
SM C20:2	Sphingomyelin with acyl residue sum C20:2	HMDB13465	Sphingomyelins	0.002955	0.03415	1.319	0.2458	2.392	0.28	0.115
C18:1	Octadecenoylcarnitine (Oleylcarnitine)	HMDB06464	Acylcarnitines	2.602e-05	0.002277	0.834	0.4301	1.238	12	6.65
C18	Octadecanoylcarnitine (Stearylcarnitine)	HMDB00848	Acylcarnitines	0.0003636	0.01273	0.662	0.2215	1.102	3.5	2.2
PC ae C42:3	Phosphatidylcholine with acyl-alkyl residue sum C42:3	HMDB13458	Phosphatidylcholines	0.002403	0.03235	0.6606	0.09701	1.224	4.3	2.45
SM (OH) C22:2	Hydroxysphingomyelin with acyl residue sum C22:2	HMDB13467	Sphingomyelins	0.0008249	0.01604	0.6404	0.1729	1.108	1.5	0.965
SM (OH) C14:1	Hydroxysphingomyelin with acyl residue sum C14:1	HMDB13462	Sphingomyelins	0.003201	0.03415	0.616	0.07059	1.161	1.15	0.685
PC ae C44:4	Phosphatidylcholine with acyl-alkyl residue sum C44:4	HMDB13455	Phosphatidylcholines	0.0002594	0.01135	0.5327	0.2143	0.851	1.25	0.825
PC ae C42:2	Phosphatidylcholine with acyl-alkyl residue sum C42:2	HMDB13438	Phosphatidylcholines	0.0006542	0.01604	0.5169	0.1517	0.882	2.35	1.65
PC ae C44:3	Phosphatidylcholine with acyl-alkyl residue sum C44:3	HMDB13449	Phosphatidylcholines	0.000796	0.01604	0.5141	0.1449	0.8833	2.2	1.45
PC ae C44:5	Phosphatidylcholine with acyl-alkyl residue sum C44:5	HMDB13456	Phosphatidylcholines	0.001693	0.02963	0.4378	0.1003	0.7754	0.68	0.46
PC ae C36:5	Phosphatidylcholine with acyl-alkyl residue sum C36:5	HMDB11220	Phosphatidylcholines	0.002362	0.03235	0.4313	0.06923	0.7934	13.5	9.9
C4	Butenoylcarnitine	HMDB13126	Acylcarnitines	0.005191	0.04781	0.3465	0.0487	0.6443	2.95	2.15
PC ae C42:1	Phosphatidylcholine with acyl-alkyl residue sum C42:2	HMDB13434	Phosphatidylcholines	0.003317	0.03415	0.3155	0.04713	0.584	2.25	1.75
SM C16:0	Sphingomyelin with acyl residue sum C16:0	HMDB10169	Sphingomyelins	0.004161	0.04046	0.2865	0.02844	0.5446	49.5	41
Gly	Glycine	HMDB00123	Amino acids	1.92e-05	0.002277	-0.8325	-1.198	-0.4671	2368	3991
TDCA	Taurodeoxycholic Acid	HMDB00896	Bile Acids	0.0005327	0.01554	-1.616	-2.587	-0.6453	1.56	5.195
Notes:
*Accession number in the Human Metabolome Database (www.hmdb.ca)
**95% confidence interval of the fold change calculated from linear model coefficients and adjusted for multiple testing

## Sheet:  Changed in liver at FDR≤0.05
Metabolites significantly changed in liver samples of Trpm6 null mice (FDR p-values ≤0.05)
Code	Metabolite	HMDB*	Chemical class	P-value t-test	FDR p-value t-test	log2 Fold change	Lower adj. 95%CI log2 FC**	Uppper adj. 95%CI log2 FC**	Median concentration in KO samples (nmol/g tissue)	Median concentration in control samples (nmol/g tissue)
SDMA	Symmetric dimethylarginine	HMDB03334	Biogenic amines	1.968e-05	0.001673	1.099	0.5645	1.633	0.93	0.415
SM (OH) C14:1	Hydroxysphingomyelin with acyl residue sum C14:1	HMDB13462	Sphingomyelins	0.001551	0.02567	1.024	0.1668	1.881	3.5	1.5
SM C18:0	Sphingomyelin with acyl residue sum C18:0	HMDB01348	Sphingomyelins	7.17e-06	0.001219	0.9858	0.5526	1.419	17.5	8.4
SM C18:1	Sphingomyelin with acyl residue sum C18:1	HMDB12100	Sphingomyelins	0.00118	0.02507	0.9229	0.1725	1.673	1.35	0.645
SM (OH) C24:1	Sphingomyelin with acyl residue sum C24:1	HMDB12107	Sphingomyelins	0.002675	0.03498	0.7678	0.07245	1.463	0.97	0.51
SM (OH) C16:1	Hydroxysphingomyelin with acyl residue sum C16:1	HMDB13463	Sphingomyelins	0.0001926	0.01091	0.754	0.2814	1.227	1.5	0.815
C18:1	Octadecenoylcarnitine (Oleylcarnitine)	HMDB06464	Acylcarnitines	0.0003676	0.0125	0.6954	0.2236	1.167	0.825	0.48
SM (OH) C22:2	Hydroxysphingomyelin with acyl residue sum C22:2	HMDB13467	Sphingomyelins	0.001332	0.02516	0.6419	0.1247	1.159	5.2	3.25
C16-OH	Hexadecenoylcarnitine (Palmitoleylcarnitine)	HMDB06317	Acylcarnitines	0.0007552	0.0214	0.6218	0.1703	1.073	0.0685	0.0445
SM C16:0	Sphingomyelin with acyl residue sum C16:0	HMDB10169	Sphingomyelins	0.0003589	0.0125	0.5948	0.1908	0.9987	95	61.5
SM (OH) C22:1	Hydroxysphingomyelin with acyl residue sum C22:1	HMDB13466	Sphingomyelins	0.00176	0.02567	0.5881	0.09623	1.08	16	10.25
SM C24:1	Sphingomyelin with acyl residue sum C24:1	HMDB12107	Sphingomyelins	0.001048	0.02507	0.5661	0.1075	1.025	65.5	44
PC ae C36:5	Phosphatidylcholine with acyl-alkyl residue sum C36:5	HMDB11220	Phosphatidylcholines	0.004067	0.04938	0.372	0.02847	0.7155	5.55	4.4
PC aa C42:6	Phosphatidylcholine with diacyl residue sum C42:6	HMDB08288	Phosphatidylcholines	0.001812	0.02567	-0.6376	-1.188	-0.08697	1.6	2.85
Notes:
*Accession number in the Human Metabolome Database (www.hmdb.ca)
**95% confidence interval of the fold change calculated from linear model coefficients and adjusted for multiple testing

## Sheet: Abbreviations of metabolites
Abbreviations of metabolites
Amino acids
Code	Analyte
Ala	Alanine
Arg	Arginine
Asn	Asparagine
Asp	Aspartate
Cit	Citrulline
Gln	Glutamine
Glu	Glutamate
Gly	Glycine
His	Histidine
Ile	Isoleucine
Leu	Leucine
Lys	Lysine
Met	Methionine
Orn	Ornithine
Phe	Phenylalanine
Pro	Proline
Ser	Serine
Thr	Threonine
Trp	Tryptophan
Tyr	Tyrosine
Val	Valine
Biogenic Amines
Code	Analyte
ADMA	Asymmetric dimethylarginine
Creatinine	Creatinine
DOPA	Dihydroxyphenylalanine
Dopamine	Dopamine
Histamine	Histamine
Kyn	Kynurenine
Met-SO	Methionine-Sulfoxide
Nitro-Tyr	Nitrotyrosine
OH-Pro	Hydroxyproline
PEA	Phenylethylamine
Putrescine	Putrescine
Sarcosine	Sarcosine
SDMA	Symmetric dimethylarginine
Serotonin	Serotonin
Spermidine	Spermidine
Spermine	Spermine
Taurine	Taurine
Acylcarnitine
Code	Analyte
C0	Carnitine (free)
C2	Acetylcarnitine
C3	Propionylcarnitine
C3:1	Propenoylcarnitine
C3-OH	Hydroxypropionylcarnitine
C4	Butyrylcarnitine / Isobutyrylcarnitine
C4:1	Butenoylcarnitine
C4-OH (C3-DC)	Hydroxybutyrylcarnitine (Malonylcarnitine)
C5	Isovalerylcarnitine / 2-Methylbutyrylcarnitine / Valerylcarnitine
C5:1	Tiglylcarnitine / 3-Methyl-crotonylcarnitine
C5:1-DC	Glutaconylcarnitine / Mesaconylcarnitine
C5-DC (C6-OH)	Glutarylcarnitine (Hydroxyhexanoylcarnitine [= Hydroxycaproylcarnitine])
C5-M-DC	Methylglutarylcarnitine
C5-OH (C3-DC-M)	Hydroxyisovalerylcarnitine / Hydroxy-2-methylbutyryl / Hydroxyvalerylcarnitine (Methylmalonylcarnitine)
C6 (C4:1-DC)	Hexanoylcarnitine [= Caproylcarnitine] (Fumarylcarnitine)
C6:1	Hexenoylcarnitine
C7-DC	Pimelylcarnitine
C8	Octanoylcarnitine [= Caprylylcarnitine]
C9	Nonanoylcarnitine [= Pelargonylcarnitine]
C10	Decanoylcarnitine [= Caprylcarnitine]
C10:1	Decenoylcarnitine
C10:2	Decadienoylcarnitine
C12	Dodecanoylcarnitine [= Laurylcarnitine]
C12:1	Dodecenoylcarnitine
C12-DC	Dodecanedioylcarnitine
C14	Tetradecanoylcarnitine [= Myristylcarnitine]
C14:1	Tetradecenoylcarnitine [= Myristoleylcarnitine]
C14:1-OH	Hydroxytetradecenoylcarnitine [= Hydroxymyristoleylcarnitine]
C14:2	Tetradecadienoylcarnitine
C14:2-OH	Hydroxytetradecadienoylcarnitine
C16	Hexadecanoylcarnitine [= Palmitoylcarnitine]
C16:1	Hexadecenoylcarnitine [= Palmitoleylcarnitine]
C16:1-OH	Hydroxyhexadecenoylcarnitine [= Hydroxypalmitoleylcarnitine]
C16:2	Hexadecadienoylcarnitine
C16:2-OH	Hydroxyhexadecadienoylcarnitine
C16-OH	Hydroxyhexadecanolycarnitine [= Hydroxypalmitoylcarnitine]
C18	Octadecanoylcarnitine [= Stearylcarnitine]
C18:1	Octadecenoylcarnitine [= Oleylcarnitine]
C18:1-OH	Hydroxyoctadecenoylcarnitine [= Hydroxyoleylcarnitine]
C18:2	Octadecadienoylcarnitine [= Linoleylcarnitine]
Lysophosphatidylcholines
Code	Analyte
lysoPC a C14:0	Lysophosphatidylcholine with acyl residue C14:0
lysoPC a C16:0	Lysophosphatidylcholine with acyl residue C16:0
lysoPC a C16:1	Lysophosphatidylcholine with acyl residue C16:1
lysoPC a C17:0	Lysophosphatidylcholine with acyl residue C17:0
lysoPC a C18:0	Lysophosphatidylcholine with acyl residue C18:0
lysoPC a C18:1	Lysophosphatidylcholine with acyl residue C18:1
lysoPC a C18:2	Lysophosphatidylcholine with acyl residue C18:2
lysoPC a C20:3	Lysophosphatidylcholine with acyl residue C20:3
lysoPC a C20:4	Lysophosphatidylcholine with acyl residue C20:4
lysoPC a C24:0	Lysophosphatidylcholine with acyl residue C24:0
lysoPC a C26:0	Lysophosphatidylcholine with acyl residue C26:0
lysoPC a C26:1	Lysophosphatidylcholine with acyl residue C26:1
lysoPC a C28:0	Lysophosphatidylcholine with acyl residue C28:0
lysoPC a C28:1	Lysophosphatidylcholine with acyl residue C28:1
Phosphatidylcholines
Code	Analyte
PC aa C24:0	Phosphatidylcholine with diacyl residue sum C24:0
PC aa C26:0	Phosphatidylcholine with diacyl residue sum C26:0
PC aa C28:1	Phosphatidylcholine with diacyl residue sum C28:1
PC aa C30:0	Phosphatidylcholine with diacyl residue sum C30:0
PC aa C30:2	Phosphatidylcholine with diacyl residue sum C30:2
PC aa C32:0	Phosphatidylcholine with diacyl residue sum C32:0
PC aa C32:1	Phosphatidylcholine with diacyl residue sum C32:1
PC aa C32:2	Phosphatidylcholine with diacyl residue sum C32:2
PC aa C32:3	Phosphatidylcholine with diacyl residue sum C32:3
PC aa C34:1	Phosphatidylcholine with diacyl residue sum C34:1
PC aa C34:2	Phosphatidylcholine with diacyl residue sum C34:2
PC aa C34:3	Phosphatidylcholine with diacyl residue sum C34:3
PC aa C34:4	Phosphatidylcholine with diacyl residue sum C34:4
PC aa C36:0	Phosphatidylcholine with diacyl residue sum C36:0
PC aa C36:1	Phosphatidylcholine with diacyl residue sum C36:1
PC aa C36:2	Phosphatidylcholine with diacyl residue sum C36:2
PC aa C36:3	Phosphatidylcholine with diacyl residue sum C36:3
PC aa C36:4	Phosphatidylcholine with diacyl residue sum C36:4
PC aa C36:5	Phosphatidylcholine with diacyl residue sum C36:5
PC aa C36:6	Phosphatidylcholine with diacyl residue sum C36:6
PC aa C38:0	Phosphatidylcholine with diacyl residue sum C38:0
PC aa C38:1	Phosphatidylcholine with diacyl residue sum C38:1
PC aa C38:3	Phosphatidylcholine with diacyl residue sum C38:3
PC aa C38:4	Phosphatidylcholine with diacyl residue sum C38:4
PC aa C38:5	Phosphatidylcholine with diacyl residue sum C38:5
PC aa C38:6	Phosphatidylcholine with diacyl residue sum C38:6
PC aa C40:1	Phosphatidylcholine with diacyl residue sum C40:1
PC aa C40:2	Phosphatidylcholine with diacyl residue sum C40:2
PC aa C40:3	Phosphatidylcholine with diacyl residue sum C40:3
PC aa C40:4	Phosphatidylcholine with diacyl residue sum C40:4
PC aa C40:5	Phosphatidylcholine with diacyl residue sum C40:5
PC aa C40:6	Phosphatidylcholine with diacyl residue sum C40:6
PC aa C42:0	Phosphatidylcholine with diacyl residue sum C42:0
PC aa C42:1	Phosphatidylcholine with diacyl residue sum C42:1
PC aa C42:2	Phosphatidylcholine with diacyl residue sum C42:2
PC aa C42:4	Phosphatidylcholine with diacyl residue sum C42:4
PC aa C42:5	Phosphatidylcholine with diacyl residue sum C42:5
PC aa C42:6	Phosphatidylcholine with diacyl residue sum C42:6
PC ae C30:0	Phosphatidylcholine with acyl-alkyl residue sum C30:0
PC ae C30:1	Phosphatidylcholine with acyl-alkyl residue sum C30:1
PC ae C30:2	Phosphatidylcholine with acyl-alkyl residue sum C30:2
PC ae C32:1	Phosphatidylcholine with acyl-alkyl residue sum C32:1
PC ae C32:2	Phosphatidylcholine with acyl-alkyl residue sum C32:2
PC ae C34:0	Phosphatidylcholine with acyl-alkyl residue sum C34:0
PC ae C34:1	Phosphatidylcholine with acyl-alkyl residue sum C34:1
PC ae C34:2	Phosphatidylcholine with acyl-alkyl residue sum C34:2
PC ae C34:3	Phosphatidylcholine with acyl-alkyl residue sum C34:3
PC ae C36:0	Phosphatidylcholine with acyl-alkyl residue sum C36:0
PC ae C36:1	Phosphatidylcholine with acyl-alkyl residue sum C36:1
PC ae C36:2	Phosphatidylcholine with acyl-alkyl residue sum C36:2
PC ae C36:3	Phosphatidylcholine with acyl-alkyl residue sum C36:3
PC ae C36:4	Phosphatidylcholine with acyl-alkyl residue sum C36:4
PC ae C36:5	Phosphatidylcholine with acyl-alkyl residue sum C36:5
PC ae C38:0	Phosphatidylcholine with acyl-alkyl residue sum C38:0
PC ae C38:1	Phosphatidylcholine with acyl-alkyl residue sum C38:1
PC ae C38:2	Phosphatidylcholine with acyl-alkyl residue sum C38:2
PC ae C38:3	Phosphatidylcholine with acyl-alkyl residue sum C38:3
PC ae C38:4	Phosphatidylcholine with acyl-alkyl residue sum C38:4
PC ae C38:5	Phosphatidylcholine with acyl-alkyl residue sum C38:5
PC ae C38:6	Phosphatidylcholine with acyl-alkyl residue sum C38:6
PC ae C40:0	Phosphatidylcholine with acyl-alkyl residue sum C40:0
PC ae C40:1	Phosphatidylcholine with acyl-alkyl residue sum C40:1
PC ae C40:2	Phosphatidylcholine with acyl-alkyl residue sum C40:2
PC ae C40:3	Phosphatidylcholine with acyl-alkyl residue sum C40:3
PC ae C40:4	Phosphatidylcholine with acyl-alkyl residue sum C40:4
PC ae C40:5	Phosphatidylcholine with acyl-alkyl residue sum C40:5
PC ae C40:6	Phosphatidylcholine with acyl-alkyl residue sum C40:6
PC ae C42:0	Phosphatidylcholine with acyl-alkyl residue sum C42:0
PC ae C42:1	Phosphatidylcholine with acyl-alkyl residue sum C42:1
PC ae C42:2	Phosphatidylcholine with acyl-alkyl residue sum C42:2
PC ae C42:3	Phosphatidylcholine with acyl-alkyl residue sum C42:3
PC ae C42:4	Phosphatidylcholine with acyl-alkyl residue sum C42:4
PC ae C42:5	Phosphatidylcholine with acyl-alkyl residue sum C42:5
PC ae C44:3	Phosphatidylcholine with acyl-alkyl residue sum C44:3
PC ae C44:4	Phosphatidylcholine with acyl-alkyl residue sum C44:4
PC ae C44:5	Phosphatidylcholine with acyl-alkyl residue sum C44:5
PC ae C44:6	Phosphatidylcholine with acyl-alkyl residue sum C44:6
Sphingomyelins
Code	Analyte
SM (OH) C14:1	Hydroxysphingomyelin with acyl residue sum C14:1
SM (OH) C16:1	Hydroxysphingomyelin with acyl residue sum C16:1
SM (OH) C22:1	Hydroxysphingomyelin with acyl residue sum C22:1
SM (OH) C22:2	Hydroxysphingomyelin with acyl residue sum C22:2
SM (OH) C24:1	Hydroxysphingomyelin with acyl residue sum C24:1
SM C16:0	Sphingomyelin with acyl residue sum C16:0
SM C16:1	Sphingomyelin with acyl residue sum C16:1
SM C18:0	Sphingomyelin with acyl residue sum C18:0
SM C18:1	Sphingomyelin with acyl residue sum C18:1
SM C20:2	Sphingomyelin with acyl residue sum C20:2
SM C22:3	Sphingomyelin with acyl residue sum C22:3
SM C24:0	Sphingomyelin with acyl residue sum C24:0
SM C24:1	Sphingomyelin with acyl residue sum C24:1
SM C26:0	Sphingomyelin with acyl residue sum C26:0
SM C26:1	Sphingomyelin with acyl residue sum C26:1
Bile acids
Code	Analyte
CA	Cholic Acid
CDCA	Chenodeoxycholic Acid
DCA	Deoxycholic Acid
GCA	Glycocholic Acid
GCDCA	Glycochenodeoxycholic Acid
GDCA	Glycodeoxycholic Acid
GLCA	Glycolithocholic Acid
GLCAS	Glycolithocholic Acid sulfate
GUDCA	Glycoursodeoxycholic Acid
HDCA	Hyodeoxycholic acid
LCA	Lithocholic Acid
MCA(a)	α- Muricholic acid
MCA(b)	β- Muricholic acid
MCA(o)	ω- Muricholic acid
TCA	Taurocholic Acid
TCDCA	Taurochenodeoxycholic Acid
TDCA	Taurodeoxycholic Acid
TLCA	Taurolithocholic Acid
TLCAS	Taurolithocholic Acid sulfate
TMCA(a+b)	α- & β- Tauromuricholic acid
TUDCA	Tauroursodeoxycholic Acid
UDCA	Ursodeoxycholic Acid
Eicosanoids/Prostaglandins
Code	Analyte
9S-HODE	(±)9-hydroxy-10E,12Z-octadecadienoic acid
13S-HODE	13(S)-hydroxy-9Z,11E-octadecadienoic acid
14(15)-EpETE	(±)14(15)-epoxy-5Z,8Z,11Z,17Z-eicosatetraenoic acid
12S-HETE	12(S)-hydroxy-5Z,8Z,10E,14Z-eicosatetraenoic acid
15S-HETE	15(S)-hydroxy-5Z,8Z,11Z,13E-eicosatetraenoic acid
15S-HpETE	15(S)- hydroperoxy-5Z,8Z,11Z,13E-eicosatetraenoic acid
LTB4	Leukotriene B4
5S-HpETE	5(S)-hydroperoxy-6E,8Z,11Z,14Z-eicosatetraenoic acid
TXB2	Tromboxane B2
LTD4	Leukotriene D4
DHA	Docosahexaenoic acid
PGE2	Prostaglandin E2
8-iso PGF2a	8-iso-Prostaglandin F2alpha
PGF2a	Prostaglandin F2alpha
6-keto-PGF1a	6-keto-Prostaglandin F1alpha
PGD2	Prostaglandin D2
AA	Arachidonic acid
Metabolites of Energy Metabolism
Code	Analytes
3-PG	3-Phosphoglycerate
alpha-KGA	alpha-Ketoglutaric acid
AMP	Adenosine-5'-monophosphate
Arg	Arginine
Asp	Aspartic acid
cAMP	3'-5'-cyclic Adenosine monophosphate
DHAP + 3-PGA	Dihydroxyacetonephosphate + 3-Phosphoglyceraldehyde
Fum	Fumaric acid
Glu	Glutamic acid
Hex	Hexose (e.g. Glucose)
Hex-P	Hexosephosphate (e.g. Glucose-1-phosphate + Glucose-6-phosphate + Fructose-6-phosphate)
Lac	Lactate
Pent-P	Pentosephosphate (e.g. Ribose-5-phosphate + Ribulose-5-phosphate)
PEP	Phosphoenolpyruvate
Pyr + OAA	Pyruvate + Oxaloacetate
Suc	Succinic acid
Tetr-P	Tetrosephosphate (e.g. Erythrose-4-phosphate)
