# Supplementary figures and images for: Epithelial magnesium transport by TRPM6 is essential for prenatal development and adult survival
Source: eLife journal article supplement (doi:10.7554/elife.20914), 2016-12-19

**Figure 6-figure supplement 1**

**A**

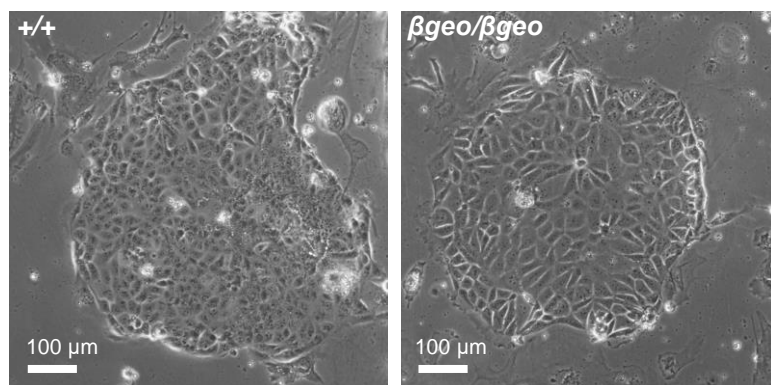

**B**

RT-PCR:

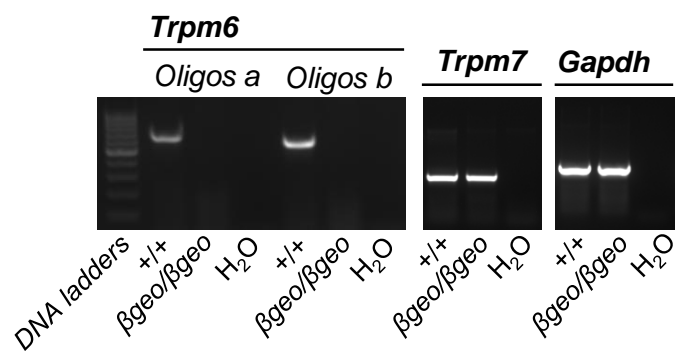

**C**

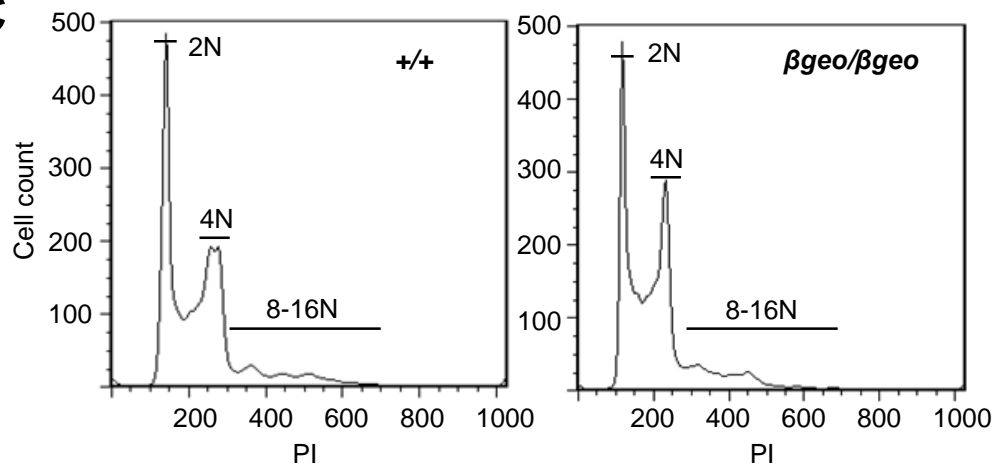

**D**

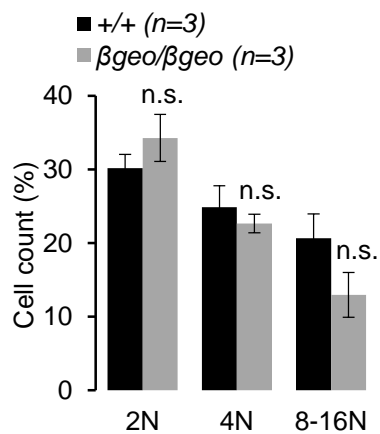

Supplement: supp [file elife_poa_e20914_Figure_6_figure_supplement_1.pdf › elife_poa_e20914_Figure_6_figure_supplement_1.pdf]
